# Supplementary material for: An auxin-mediated ultradian rhythm promotes root regeneration in Arabidopsis
Source: Research Square preprint supplement (doi:10.21203/rs.3.rs-604908/v1), 2021-06-25
Supplement: Supplementary file 2 [file 3d725619cb54bae216dc0e9b.xlsx]

## Sheet: Supplementary Table 5
Supplementary Table 5. A list of primers used in this study. F: forward; R: reverse.
Name of primer	Sequence (5' to 3')	Purpose
pPIN3_F	AGAGGATCCCTGACATATGAAGTGCTTCCAAAAG	Cloning
pPIN3_R	GATGGATCCCTTGAAGGGACAAAAATGGAAAAC	Cloning
pAFB2_F	AGAGGATCCCACCATTGAGAAAATATGGTTAACAG	Cloning
pAFB2_R	ATAAAGCTTCTCTAACTTCACCAGCAAGATTCC	Cloning
EAR1::EAR1_F	CAGAGATCTCCTAATCCTACTCACTCACCAACTTGTG	Cloning
EAR1::EAR1_R	CTTAGGCCTTGTGGCAATGCAGAAAGGCTC	Cloning
pEAR1_F	AACAAGACAATACACTTACGTACGTAGG	Cloning
pEAR1_R	TTTTTCAAAAGGAAATCACAAACC	Cloning
ORE1_F	TCTGCTACTGCCATTGGTGA	qRT-PCR
ORE1_R	TCTCCCATCTTAGCCTTCCA	qRT-PCR
M21-83_F	CCACTGAACCTCCGAATCAATCTC	Sequencing
M21-83_R	GTCGAACACTTCATCTGCACCTTC	Sequencing
M23_F	CGAAGCTTCTCAGAGGAAGAGATTCTC	Sequencing
M23_R	ACCCCACAGTACATGGTTCCATAATG	Sequencing
EAR1_F	TTGAATTTTTCACCCTCACTTTC	qRT-PCR
EAR1_R	ACAACACTATTCCCTCGCTTTT	qRT-PCR
S108025_LP	CCGTTGGATATTCCACTCATG	Genotyping
S108025_RP	CGATTGGTTCTTGAAGCTGTC	Genotyping
