# Supplementary material for: An auxin-mediated ultradian rhythm promotes root regeneration in Arabidopsis
Source: Research Square preprint supplement (doi:10.21203/rs.3.rs-604908/v1), 2021-06-25
Supplement: Supplementary file 4 [file 6aec4f8ddead3473398c4ea3.xlsx]

## Sheet: Supplementary Table 2
Supplementary Table 2. Results of Gene Ontology (GO) and Kyoto Encyclopedia of Genes and Genomes (KEGG) enrichment analyses of UR-related genes.
Source	GO term name	GO term id	Adj. p-value	GO term size	Query size	Intersections
GO:BP	response to stimulus	GO:0050896	5.57e-26	6742	1297	AT4G28860,AT5G25350,AT1G80460,AT1G18390,AT4G13980,AT5G22050,AT1G73660,AT5G38850,AT1G16110,AT4G28880,AT1G08970,AT5G37770,AT2G41100,AT1G80440,AT5G56550,AT2G26710,AT2G17780,AT4G32620,AT1G73680,AT2G20370,AT3G51670,AT5G54250,AT3G10985,AT3G26030,AT5G65730,AT4G36830,AT3G08720,AT1G80420,AT1G18330,AT1G15530,AT2G46450,AT2G47900,AT5G38895,AT2G40130,AT2G46440,AT3G15500,AT5G42750,AT3G15510,AT3G51630,AT5G09990…
GO:BP	response to abiotic stimulus	GO:0009628	1.22e-25	2343	545	AT4G28860,AT1G80460,AT1G18390,AT4G13980,AT1G73660,AT4G28880,AT1G08970,AT5G37770,AT2G41100,AT5G65730,AT3G08720,AT1G18330,AT2G47900,AT3G15500,AT3G51630,AT2G23070,AT2G37860,AT1G53210,AT1G62660,AT3G27690,AT5G15650,AT1G69570,AT2G16660,AT1G12860,AT3G02040,AT1G67360,AT3G19130,AT1G02270,AT4G21150,AT5G53170,AT3G03050,AT1G64860,AT5G20730,AT5G08020,AT5G07460,AT1G29300,AT1G07870,AT4G01660,AT3G49580,AT4G18880…
GO:BP	response to organic substance	GO:0010033	4.39e-21	2276	515	AT5G25350,AT1G80460,AT1G18390,AT1G73660,AT1G08970,AT5G37770,AT1G80440,AT2G26710,AT2G20370,AT3G51670,AT3G10985,AT4G36830,AT1G18330,AT5G38895,AT2G40130,AT3G15500,AT5G42750,AT3G15510,AT3G63010,AT2G23070,AT1G62660,AT3G27690,AT3G15540,AT4G08850,AT3G09820,AT1G53230,AT1G13430,AT4G22200,AT4G13930,AT5G53160,AT5G28770,AT1G30260,AT2G33310,AT3G23210,AT5G20730,AT1G79700,AT4G18890,AT4G03190,AT3G03990,AT5G20700…
GO:BP	response to chemical	GO:0042221	6.22e-20	3436	715	AT5G25350,AT1G80460,AT1G18390,AT1G73660,AT1G08970,AT5G37770,AT2G41100,AT1G80440,AT5G56550,AT2G26710,AT1G73680,AT2G20370,AT3G51670,AT3G10985,AT5G65730,AT4G36830,AT3G08720,AT1G18330,AT2G47900,AT5G38895,AT2G40130,AT3G15500,AT5G42750,AT3G15510,AT3G63010,AT2G23070,AT2G37860,AT1G53210,AT1G62660,AT3G27690,AT3G15540,AT5G15650,AT3G28200,AT4G08850,AT3G02040,AT3G09820,AT1G67360,AT1G53230,AT1G13430,AT4G22200…
GO:BP	cellular response to stimulus	GO:0051716	1.2e-19	3473	720	AT4G28860,AT5G25350,AT1G18390,AT4G13980,AT5G22050,AT1G73660,AT5G38850,AT1G16110,AT4G28880,AT1G08970,AT2G41100,AT1G80440,AT2G17780,AT4G32620,AT1G73680,AT2G20370,AT3G51670,AT5G54250,AT3G26030,AT4G36830,AT3G08720,AT1G80420,AT1G15530,AT2G47900,AT3G15500,AT5G42750,AT3G51630,AT3G63010,AT2G23070,AT1G53210,AT1G62660,AT3G27690,AT4G14580,AT3G15540,AT3G28200,AT4G08850,AT3G02040,AT1G67360,AT3G19130,AT3G46830…
GO:BP	regulation of cellular process	GO:0050794	5.16e-18	5490	1049	AT4G28860,AT5G25350,AT1G80460,AT4G13980,AT1G44810,AT5G58900,AT3G18060,AT5G22050,AT1G73660,AT5G38850,AT1G16110,AT4G28880,AT1G08970,AT5G37770,AT2G41100,AT3G18035,AT1G80440,AT3G25580,AT2G17780,AT4G32620,AT2G20370,AT3G26030,AT3G08720,AT5G03220,AT2G30620,AT3G24050,AT2G26770,AT1G80420,AT1G18330,AT1G15530,AT3G08710,AT2G47900,AT5G49880,AT3G15500,AT3G16630,AT1G32360,AT5G42750,AT4G38510,AT3G15510,AT5G54290…
GO:BP	regulation of biological process	GO:0050789	3.25e-17	6154	1152	AT4G28860,AT5G25350,AT1G80460,AT1G75220,AT4G13980,AT1G44810,AT5G58900,AT3G18060,AT5G22050,AT1G73660,AT5G38850,AT1G16110,AT4G28880,AT1G08970,AT5G37770,AT2G41100,AT3G18035,AT1G80440,AT3G25580,AT2G26710,AT2G17780,AT4G32620,AT2G20370,AT3G26030,AT3G08720,AT5G03220,AT2G30620,AT3G24050,AT5G49160,AT2G26770,AT1G80420,AT1G18330,AT1G15530,AT3G08710,AT2G47900,AT5G49880,AT3G15500,AT3G16630,AT1G32360,AT5G42750…
GO:BP	cellular process	GO:0009987	1.09e-16	14475	2418	AT4G28860,AT1G72150,AT2G31200,AT5G25350,AT4G34640,AT5G18440,AT1G80460,AT1G14030,AT1G18390,AT4G13980,AT1G44810,AT5G58900,AT3G18060,AT5G11430,AT5G22050,AT1G73660,AT5G38850,AT4G35760,AT1G72160,AT4G09510,AT1G16110,AT5G49840,AT4G13990,AT4G19860,AT4G28880,AT4G36890,AT1G08970,AT5G37770,AT2G41100,AT2G35680,AT3G18035,AT1G80440,AT2G43360,AT3G25580,AT2G30600,AT2G17780,AT4G32620,AT2G35690,AT1G73680,AT1G08980…
GO:BP	cellular response to organic substance	GO:0071310	2.29e-16	1250	306	AT5G25350,AT1G18390,AT1G73660,AT1G08970,AT1G80440,AT2G20370,AT3G51670,AT4G36830,AT3G15500,AT5G42750,AT3G63010,AT2G23070,AT1G62660,AT3G27690,AT3G15540,AT4G08850,AT4G13930,AT5G53160,AT5G28770,AT2G33310,AT3G23210,AT5G20730,AT1G79700,AT4G18890,AT4G03190,AT3G03990,AT3G50060,AT2G23950,AT4G02060,AT2G22430,AT2G47000,AT2G17820,AT1G78570,AT4G03110,AT5G04870,AT3G04110,AT2G31230,AT1G22070,AT2G01570,AT4G18010…
GO:BP	cell communication	GO:0007154	2.69e-16	2419	520	AT4G28860,AT5G25350,AT1G18390,AT5G22050,AT1G73660,AT5G38850,AT1G16110,AT4G28880,AT1G08970,AT2G41100,AT1G80440,AT2G17780,AT2G20370,AT3G26030,AT3G08720,AT1G15530,AT3G08710,AT3G15500,AT5G42750,AT3G51630,AT3G63010,AT2G23070,AT1G62660,AT4G14580,AT3G15540,AT4G08850,AT5G49830,AT3G46830,AT5G53160,AT5G28770,AT3G03950,AT2G33310,AT5G46450,AT5G20730,AT1G79700,AT1G63700,AT4G18890,AT4G03190,AT1G07870,AT3G49580…
GO:BP	biological regulation	GO:0065007	2.89e-16	7035	1287	AT4G28860,AT5G25350,AT1G80460,AT1G75220,AT4G13980,AT1G44810,AT5G58900,AT3G18060,AT5G22050,AT1G73660,AT5G38850,AT1G16110,AT4G28880,AT1G08970,AT5G37770,AT2G41100,AT3G18035,AT1G80440,AT3G25580,AT2G26710,AT2G17780,AT4G32620,AT2G35690,AT1G08980,AT2G20370,AT3G51670,AT3G26030,AT3G08720,AT5G03220,AT2G30620,AT3G24050,AT5G49160,AT2G26770,AT1G80420,AT1G18330,AT1G15530,AT3G08710,AT2G47900,AT5G49880,AT3G15500…
GO:BP	response to endogenous stimulus	GO:0009719	7.03e-16	1938	432	AT5G25350,AT1G18390,AT1G08970,AT5G37770,AT1G80440,AT2G26710,AT2G20370,AT3G51670,AT4G36830,AT1G18330,AT2G40130,AT3G15500,AT5G42750,AT3G15510,AT3G63010,AT2G23070,AT1G62660,AT3G27690,AT3G15540,AT4G08850,AT1G53230,AT1G13430,AT4G22200,AT4G13930,AT5G53160,AT5G28770,AT1G30260,AT2G33310,AT5G20730,AT1G79700,AT4G18890,AT4G03190,AT3G03990,AT3G50060,AT2G23950,AT1G04400,AT2G22430,AT2G47000,AT3G61890,AT2G17820…
GO:BP	cellular response to chemical stimulus	GO:0070887	9.32e-16	1787	404	AT5G25350,AT1G18390,AT1G73660,AT1G08970,AT2G41100,AT1G80440,AT1G73680,AT2G20370,AT3G51670,AT4G36830,AT3G08720,AT2G47900,AT3G15500,AT5G42750,AT3G63010,AT2G23070,AT1G53210,AT1G62660,AT3G27690,AT3G15540,AT3G28200,AT4G08850,AT3G02040,AT1G67360,AT4G13930,AT5G53160,AT5G28770,AT2G33310,AT3G23210,AT5G20730,AT1G79700,AT4G18890,AT5G07460,AT4G03190,AT1G07870,AT3G03990,AT3G49580,AT3G50060,AT2G23950,AT3G60320…
GO:BP	cellular response to endogenous stimulus	GO:0071495	1.58e-15	1125	279	AT5G25350,AT1G18390,AT1G08970,AT1G80440,AT2G20370,AT3G51670,AT4G36830,AT3G15500,AT5G42750,AT3G63010,AT2G23070,AT1G62660,AT3G27690,AT3G15540,AT4G08850,AT4G13930,AT5G53160,AT5G28770,AT2G33310,AT5G20730,AT1G79700,AT4G18890,AT4G03190,AT3G03990,AT3G50060,AT2G23950,AT2G22430,AT2G47000,AT2G17820,AT1G78570,AT4G03110,AT5G04870,AT3G04110,AT2G31230,AT1G22070,AT2G01570,AT4G18010,AT2G41140,AT5G49980,AT3G09770…
GO:BP	response to hormone	GO:0009725	4.1e-15	1901	422	AT5G25350,AT1G18390,AT1G08970,AT5G37770,AT1G80440,AT2G26710,AT2G20370,AT3G51670,AT4G36830,AT1G18330,AT2G40130,AT3G15500,AT5G42750,AT3G15510,AT3G63010,AT2G23070,AT1G62660,AT3G27690,AT3G15540,AT4G08850,AT1G53230,AT1G13430,AT4G22200,AT5G53160,AT5G28770,AT1G30260,AT2G33310,AT5G20730,AT1G79700,AT4G18890,AT4G03190,AT3G03990,AT3G50060,AT1G04400,AT2G22430,AT2G47000,AT3G61890,AT2G17820,AT1G78570,AT4G03110…
GO:BP	signal transduction	GO:0007165	6.18e-15	2128	462	AT4G28860,AT5G25350,AT5G22050,AT1G73660,AT5G38850,AT1G16110,AT4G28880,AT1G08970,AT2G41100,AT1G80440,AT2G17780,AT2G20370,AT3G26030,AT3G08720,AT1G15530,AT3G15500,AT5G42750,AT3G51630,AT3G63010,AT2G23070,AT1G62660,AT4G14580,AT3G15540,AT4G08850,AT3G46830,AT5G53160,AT3G03950,AT2G33310,AT5G46450,AT5G20730,AT1G79700,AT1G63700,AT4G18890,AT4G03190,AT1G07870,AT3G50060,AT5G59150,AT2G23950,AT4G02060,AT1G04400…
GO:BP	cellular response to hormone stimulus	GO:0032870	1.57e-14	1086	268	AT5G25350,AT1G18390,AT1G08970,AT1G80440,AT2G20370,AT3G51670,AT4G36830,AT3G15500,AT5G42750,AT3G63010,AT2G23070,AT1G62660,AT3G27690,AT3G15540,AT4G08850,AT5G53160,AT5G28770,AT2G33310,AT5G20730,AT1G79700,AT4G18890,AT4G03190,AT3G03990,AT3G50060,AT2G22430,AT2G47000,AT2G17820,AT1G78570,AT4G03110,AT5G04870,AT3G04110,AT2G31230,AT1G22070,AT2G01570,AT4G18010,AT2G41140,AT5G49980,AT3G09770,AT1G14920,AT4G35890…
GO:BP	response to oxygen-containing compound	GO:1901700	2.19e-14	1808	402	AT1G18390,AT1G73660,AT1G08970,AT5G37770,AT2G26710,AT2G20370,AT3G10985,AT5G65730,AT4G36830,AT2G47900,AT5G38895,AT2G40130,AT3G15500,AT5G42750,AT3G15510,AT3G63010,AT2G23070,AT2G37860,AT1G62660,AT3G27690,AT3G09820,AT1G67360,AT4G22200,AT4G13930,AT5G53160,AT5G28770,AT3G23210,AT4G18890,AT3G03990,AT5G20700,AT4G18880,AT3G50060,AT2G23950,AT3G60320,AT4G02060,AT2G22490,AT1G04400,AT2G22430,AT3G61890,AT2G17820…
GO:BP	signaling	GO:0023052	3.49e-14	2170	466	AT4G28860,AT5G25350,AT5G22050,AT1G73660,AT5G38850,AT1G16110,AT4G28880,AT1G08970,AT2G41100,AT1G80440,AT2G17780,AT2G20370,AT3G26030,AT3G08720,AT1G15530,AT3G15500,AT5G42750,AT3G51630,AT3G63010,AT2G23070,AT1G62660,AT4G14580,AT3G15540,AT4G08850,AT3G46830,AT5G53160,AT3G03950,AT2G33310,AT5G46450,AT5G20730,AT1G79700,AT1G63700,AT4G18890,AT4G03190,AT1G07870,AT3G50060,AT5G59150,AT2G23950,AT4G02060,AT1G04400…
GO:BP	hormone-mediated signaling pathway	GO:0009755	9.93e-14	961	241	AT5G25350,AT1G08970,AT1G80440,AT3G15500,AT5G42750,AT3G63010,AT1G62660,AT3G15540,AT4G08850,AT5G53160,AT2G33310,AT5G20730,AT1G79700,AT4G18890,AT4G03190,AT3G50060,AT2G22430,AT2G47000,AT2G17820,AT1G78570,AT5G04870,AT3G04110,AT2G31230,AT2G01570,AT4G18010,AT2G41140,AT5G49980,AT3G09770,AT1G14920,AT4G35890,AT1G15670,AT3G45640,AT5G11590,AT2G18790,AT1G53300,AT2G45000,AT5G53060,AT3G48040,AT4G22330,AT4G36900…
GO:BP	metabolic process	GO:0008152	1.98e-13	13350	2231	AT4G28860,AT5G25350,AT4G34640,AT1G80460,AT1G14030,AT1G18390,AT4G13980,AT1G44810,AT5G58900,AT5G11430,AT5G22050,AT1G73660,AT4G35760,AT1G28600,AT4G09510,AT1G16110,AT5G49840,AT4G13990,AT4G19860,AT4G28880,AT4G36890,AT1G08970,AT5G37770,AT2G35680,AT3G18035,AT1G80440,AT2G43360,AT1G28610,AT2G26710,AT2G30600,AT5G18670,AT4G32620,AT2G35690,AT1G73680,AT1G08980,AT2G20370,AT3G26030,AT5G65730,AT4G36830,AT5G22020…
GO:BP	organic substance metabolic process	GO:0071704	1.41e-12	11832	1999	AT4G28860,AT5G25350,AT4G34640,AT1G80460,AT1G14030,AT1G18390,AT4G13980,AT1G44810,AT5G58900,AT5G11430,AT5G22050,AT1G73660,AT1G28600,AT4G09510,AT1G16110,AT5G49840,AT4G13990,AT4G19860,AT4G28880,AT4G36890,AT1G08970,AT2G35680,AT3G18035,AT1G80440,AT2G43360,AT1G28610,AT2G26710,AT2G30600,AT5G18670,AT4G32620,AT2G35690,AT1G73680,AT1G08980,AT2G20370,AT3G26030,AT5G65730,AT4G36830,AT3G08720,AT3G10910,AT3G17770…
GO:BP	primary metabolic process	GO:0044238	3.68e-11	11143	1884	AT4G28860,AT5G25350,AT4G34640,AT1G80460,AT1G14030,AT1G18390,AT4G13980,AT1G44810,AT5G58900,AT5G11430,AT5G22050,AT1G73660,AT1G28600,AT4G09510,AT1G16110,AT5G49840,AT4G13990,AT4G19860,AT4G28880,AT4G36890,AT1G08970,AT2G35680,AT3G18035,AT1G28610,AT2G26710,AT2G30600,AT5G18670,AT4G32620,AT2G35690,AT1G73680,AT2G20370,AT3G26030,AT5G65730,AT4G36830,AT3G08720,AT3G10910,AT3G17770,AT5G03220,AT2G30620,AT1G76390…
GO:BP	cellular metabolic process	GO:0044237	1.25e-10	11604	1949	AT4G28860,AT5G25350,AT4G34640,AT1G80460,AT1G14030,AT1G18390,AT4G13980,AT1G44810,AT5G58900,AT5G11430,AT5G22050,AT1G73660,AT4G35760,AT4G09510,AT1G16110,AT4G13990,AT4G19860,AT4G28880,AT4G36890,AT1G08970,AT5G37770,AT2G35680,AT3G18035,AT1G80440,AT2G43360,AT2G30600,AT4G32620,AT2G35690,AT1G73680,AT1G08980,AT2G20370,AT3G26030,AT5G65730,AT4G36830,AT3G08720,AT3G10910,AT3G17770,AT5G03220,AT2G30620,AT1G76390…
GO:BP	developmental process	GO:0032502	3.56e-10	3375	651	AT4G28860,AT1G72150,AT1G18390,AT1G75220,AT3G63088,AT4G09510,AT4G28880,AT4G36890,AT1G08970,AT5G37770,AT2G17780,AT1G73680,AT2G20370,AT3G10985,AT5G03220,AT3G24050,AT5G49160,AT1G74380,AT1G12840,AT3G16630,AT3G15510,AT3G51630,AT3G63010,AT2G23070,AT5G39990,AT2G37860,AT3G15540,AT1G70070,AT5G15650,AT4G36810,AT1G69570,AT1G73600,AT4G08850,AT1G12860,AT3G18830,AT2G35610,AT1G67360,AT1G53230,AT2G35620,AT4G37450…
GO:BP	multicellular organism development	GO:0007275	7.52e-10	2799	552	AT4G28860,AT1G18390,AT1G75220,AT3G63088,AT4G09510,AT4G28880,AT4G36890,AT1G08970,AT5G37770,AT2G17780,AT1G73680,AT3G10985,AT5G49160,AT1G74380,AT3G15510,AT3G51630,AT3G63010,AT2G23070,AT2G37860,AT3G15540,AT1G70070,AT5G15650,AT4G36810,AT1G69570,AT1G73600,AT1G12860,AT3G18830,AT2G35610,AT1G67360,AT1G53230,AT2G35620,AT4G37450,AT1G20780,AT3G55610,AT3G62500,AT2G42200,AT1G01880,AT3G23210,AT5G20730,AT3G19190…
GO:BP	shoot system development	GO:0048367	1.2e-09	955	225	AT3G63088,AT4G36890,AT5G37770,AT1G73680,AT3G10985,AT5G49160,AT3G15510,AT3G63010,AT2G37860,AT3G15540,AT1G69570,AT1G53230,AT1G20780,AT2G42200,AT5G20730,AT3G19190,AT1G63700,AT3G03990,AT3G03090,AT2G23950,AT5G04810,AT2G39705,AT5G08070,AT1G04400,AT3G24770,AT4G03110,AT2G01570,AT3G08640,AT4G08920,AT1G14920,AT4G35890,AT4G12970,AT5G65810,AT3G45640,AT5G49020,AT4G36930,AT1G69690,AT1G53310,AT4G36920,AT1G19300…
GO:BP	response to acid chemical	GO:0001101	1.35e-09	1357	299	AT1G18390,AT1G08970,AT5G37770,AT2G20370,AT3G10985,AT5G65730,AT4G36830,AT3G15500,AT3G15510,AT3G63010,AT2G23070,AT1G62660,AT3G27690,AT1G67360,AT4G22200,AT4G13930,AT5G53160,AT5G28770,AT3G50060,AT3G60320,AT1G04400,AT2G22430,AT3G61890,AT2G17820,AT3G20660,AT4G39730,AT4G03110,AT4G26640,AT5G04870,AT2G27090,AT3G04110,AT1G22070,AT2G01570,AT4G18010,AT2G41140,AT2G46590,AT2G15620,AT3G09770,AT4G08920,AT1G14920…
GO:BP	cellular carbohydrate metabolic process	GO:0044262	2.05e-09	508	137	AT1G80460,AT4G09510,AT4G36890,AT2G20370,AT5G65730,AT3G17770,AT1G74380,AT1G62660,AT3G02040,AT2G35610,AT2G35620,AT1G03310,AT3G03050,AT1G77460,AT3G14570,AT4G17770,AT5G04040,AT5G04885,AT3G01640,AT4G18010,AT4G39770,AT2G18700,AT4G39800,AT2G19860,AT3G55070,AT1G03400,AT1G50460,AT5G09870,AT1G19300,AT1G15690,AT2G39770,AT5G61420,AT5G64380,AT1G12780,AT2G19800,AT5G15740,AT1G10670,AT1G05630,AT3G21190,AT4G03210…
GO:BP	system development	GO:0048731	2.15e-09	1942	402	AT1G18390,AT3G63088,AT4G09510,AT4G36890,AT5G37770,AT2G17780,AT1G73680,AT3G10985,AT5G49160,AT1G74380,AT3G15510,AT3G51630,AT3G63010,AT2G23070,AT2G37860,AT3G15540,AT1G70070,AT4G36810,AT1G69570,AT3G18830,AT2G35610,AT1G53230,AT2G35620,AT1G20780,AT3G55610,AT3G62500,AT2G42200,AT5G20730,AT3G19190,AT1G63700,AT3G03990,AT3G03090,AT3G50060,AT2G42280,AT2G23950,AT5G04810,AT2G39705,AT5G08070,AT1G04400,AT3G50070…
GO:BP	leaf development	GO:0048366	2.16e-09	374	109	AT1G73680,AT3G10985,AT2G37860,AT1G53230,AT1G20780,AT2G42200,AT5G20730,AT3G19190,AT5G04810,AT5G08070,AT1G04400,AT2G01570,AT3G08640,AT4G08920,AT1G14920,AT4G35890,AT5G65810,AT1G53310,AT1G19300,AT1G15690,AT4G22330,AT3G19290,AT1G10670,AT4G01500,AT4G30340,AT4G01540,AT1G69780,AT5G44160,AT4G24670,AT3G16857,AT1G13260,AT4G00180,AT4G33950,AT3G61630,AT4G14713,AT3G56400,AT3G12280,AT5G63770,AT3G49720,AT2G34650…
GO:BP	anatomical structure development	GO:0048856	2.92e-09	3189	614	AT4G28860,AT1G72150,AT1G18390,AT1G75220,AT3G63088,AT4G09510,AT4G28880,AT4G36890,AT1G08970,AT5G37770,AT2G17780,AT1G73680,AT2G20370,AT3G10985,AT5G03220,AT5G49160,AT1G74380,AT1G12840,AT3G16630,AT3G15510,AT3G51630,AT3G63010,AT2G23070,AT5G39990,AT2G37860,AT3G15540,AT1G70070,AT5G15650,AT4G36810,AT1G69570,AT1G73600,AT4G08850,AT1G12860,AT3G18830,AT2G35610,AT1G67360,AT1G53230,AT2G35620,AT4G37450,AT1G20780…
GO:BP	cellular protein modification process	GO:0006464	4.38e-09	3154	607	AT4G28860,AT5G25350,AT1G14030,AT1G18390,AT5G22050,AT1G73660,AT1G16110,AT4G13990,AT4G28880,AT2G35680,AT2G30600,AT4G32620,AT2G20370,AT3G26030,AT3G08720,AT3G10910,AT1G76390,AT1G15530,AT5G38895,AT4G38520,AT4G09560,AT5G42750,AT4G26940,AT4G35780,AT1G68400,AT3G51630,AT2G23070,AT1G49620,AT5G40540,AT5G22920,AT1G76360,AT3G27690,AT4G14580,AT2G32710,AT4G08850,AT2G35610,AT3G19150,AT2G35620,AT3G06270,AT5G53140…
GO:BP	protein modification process	GO:0036211	4.38e-09	3154	607	AT4G28860,AT5G25350,AT1G14030,AT1G18390,AT5G22050,AT1G73660,AT1G16110,AT4G13990,AT4G28880,AT2G35680,AT2G30600,AT4G32620,AT2G20370,AT3G26030,AT3G08720,AT3G10910,AT1G76390,AT1G15530,AT5G38895,AT4G38520,AT4G09560,AT5G42750,AT4G26940,AT4G35780,AT1G68400,AT3G51630,AT2G23070,AT1G49620,AT5G40540,AT5G22920,AT1G76360,AT3G27690,AT4G14580,AT2G32710,AT4G08850,AT2G35610,AT3G19150,AT2G35620,AT3G06270,AT5G53140…
GO:BP	response to light stimulus	GO:0009416	4.65e-09	767	187	AT4G28860,AT1G18390,AT4G28880,AT1G08970,AT5G37770,AT2G41100,AT3G51630,AT2G23070,AT2G37860,AT3G27690,AT1G69570,AT1G64860,AT5G20730,AT5G08020,AT1G29300,AT4G01660,AT2G42280,AT1G04400,AT4G03110,AT5G43760,AT2G01570,AT2G46590,AT3G08640,AT4G08920,AT1G14920,AT1G53380,AT5G09810,AT2G26640,AT5G22830,AT3G45640,AT3G62410,AT4G36930,AT2G18790,AT5G64330,AT5G08130,AT4G16780,AT1G51140,AT1G10670,AT1G05630,AT1G42550…
GO:BP	plant organ development	GO:0099402	5.22e-09	1049	240	AT4G09510,AT2G17780,AT1G73680,AT3G10985,AT1G74380,AT3G15510,AT3G63010,AT2G37860,AT3G15540,AT3G18830,AT2G35610,AT1G53230,AT1G20780,AT2G42200,AT5G20730,AT3G19190,AT3G50060,AT2G23950,AT5G04810,AT5G08070,AT1G04400,AT2G02080,AT3G08800,AT2G47000,AT2G01570,AT2G11890,AT3G08640,AT4G08920,AT1G14920,AT4G35890,AT4G20140,AT5G09810,AT5G65810,AT3G45640,AT4G36930,AT5G42030,AT1G50460,AT1G53310,AT3G13870,AT4G36920…
GO:BP	phyllome development	GO:0048827	5.32e-09	534	141	AT1G73680,AT3G10985,AT3G15510,AT2G37860,AT3G15540,AT1G53230,AT1G20780,AT2G42200,AT5G20730,AT3G19190,AT2G23950,AT5G04810,AT5G08070,AT1G04400,AT2G01570,AT3G08640,AT4G08920,AT1G14920,AT4G35890,AT5G65810,AT3G45640,AT4G36930,AT1G53310,AT4G36920,AT1G19300,AT1G15690,AT4G22330,AT3G19290,AT1G10670,AT4G01500,AT4G30340,AT4G01540,AT1G69780,AT1G51170,AT5G44160,AT4G24670,AT3G26810,AT3G16857,AT1G13260,AT4G00180…
GO:BP	carbohydrate biosynthetic process	GO:0016051	6.46e-09	380	109	AT4G36890,AT2G20370,AT1G74380,AT3G63010,AT1G70090,AT5G15650,AT2G35610,AT2G35620,AT1G03310,AT2G05320,AT3G03050,AT1G77460,AT1G06780,AT3G14570,AT4G17770,AT5G04885,AT4G39770,AT3G04120,AT2G18700,AT4G39800,AT5G65810,AT3G55070,AT3G62410,AT1G03400,AT5G09870,AT1G19300,AT2G39770,AT5G61420,AT5G64380,AT1G12780,AT2G19800,AT5G15740,AT1G10670,AT4G02130,AT3G21190,AT4G32410,AT4G39120,AT1G74910,AT2G22190,AT2G32540…
GO:BP	regulation of biological quality	GO:0065008	8.85e-09	1328	290	AT1G75220,AT3G18060,AT5G37770,AT3G25580,AT2G26710,AT2G35690,AT1G08980,AT3G51670,AT3G08710,AT1G32360,AT5G42750,AT4G38510,AT5G54290,AT1G53210,AT3G27690,AT3G25500,AT5G18600,AT3G02040,AT4G29670,AT4G22200,AT4G13930,AT5G28770,AT3G23210,AT1G01080,AT5G08020,AT1G77460,AT3G03990,AT2G23950,AT1G04400,AT1G05520,AT2G47000,AT3G14570,AT5G63530,AT1G78570,AT3G04110,AT5G54140,AT2G46590,AT3G09770,AT4G08920,AT1G14920…
GO:BP	regulation of gene expression	GO:0010468	1.2e-08	2986	576	AT1G80460,AT4G13980,AT1G44810,AT5G58900,AT1G08970,AT3G18035,AT4G32620,AT3G08720,AT5G03220,AT2G30620,AT3G24050,AT5G49160,AT1G18330,AT2G47900,AT3G15500,AT1G32360,AT3G15510,AT1G76350,AT3G63010,AT3G15540,AT1G70070,AT5G18600,AT1G69570,AT1G12860,AT1G53230,AT1G31280,AT2G45810,AT4G14540,AT1G13450,AT2G42200,AT5G28770,AT2G33310,AT3G23210,AT1G64860,AT5G20730,AT1G79700,AT4G18890,AT1G01080,AT5G59180,AT4G03190…
GO:BP	phosphorus metabolic process	GO:0006793	1.45e-08	2527	498	AT4G28860,AT4G34640,AT1G80460,AT1G18390,AT5G22050,AT1G73660,AT1G16110,AT4G19860,AT4G28880,AT2G35680,AT3G26030,AT3G08720,AT3G17770,AT1G80420,AT1G15530,AT4G38520,AT5G42750,AT4G35780,AT1G68400,AT3G51630,AT2G23070,AT1G49620,AT5G40540,AT1G76360,AT4G14580,AT2G32710,AT5G15650,AT4G36810,AT1G73600,AT4G08850,AT3G02040,AT3G09820,AT3G19150,AT2G35620,AT3G06270,AT5G53140,AT2G25620,AT3G55610,AT5G53160,AT3G50000…
GO:BP	regulation of metabolic process	GO:0019222	1.69e-08	3781	707	AT1G80460,AT4G13980,AT1G44810,AT5G58900,AT1G08970,AT5G37770,AT3G18035,AT1G80440,AT4G32620,AT3G26030,AT3G08720,AT5G03220,AT2G30620,AT3G24050,AT5G49160,AT1G80420,AT1G18330,AT2G47900,AT3G15500,AT1G32360,AT5G42750,AT3G15510,AT1G76350,AT3G63010,AT1G49620,AT3G27690,AT3G15540,AT2G32710,AT1G70070,AT5G18600,AT1G69570,AT1G12860,AT3G19150,AT1G53230,AT1G31280,AT5G18650,AT2G45810,AT1G20780,AT4G14540,AT1G13450…
GO:BP	response to lipid	GO:0033993	1.8e-08	868	204	AT1G18390,AT1G08970,AT5G37770,AT2G26710,AT4G36830,AT2G40130,AT5G42750,AT3G63010,AT2G23070,AT1G62660,AT3G27690,AT4G22200,AT5G53160,AT5G28770,AT4G18890,AT3G03990,AT1G04400,AT2G22430,AT3G61890,AT2G17820,AT5G04870,AT3G04110,AT2G01570,AT4G18010,AT2G41140,AT3G09770,AT4G08920,AT1G14920,AT4G35890,AT4G28080,AT4G19700,AT4G09460,AT3G45640,AT1G50420,AT4G08980,AT1G53300,AT5G61420,AT3G48040,AT4G22330,AT3G55730…
GO:BP	regulation of biosynthetic process	GO:0009889	2.04e-08	2852	552	AT1G80460,AT4G13980,AT1G44810,AT5G58900,AT1G08970,AT3G18035,AT4G32620,AT3G08720,AT5G03220,AT2G30620,AT3G24050,AT1G18330,AT2G47900,AT3G15500,AT1G32360,AT5G42750,AT3G15510,AT1G76350,AT3G27690,AT3G15540,AT5G18600,AT1G69570,AT1G12860,AT1G53230,AT1G31280,AT2G45810,AT1G20780,AT4G14540,AT1G13450,AT2G42200,AT5G28770,AT2G33310,AT3G23210,AT1G64860,AT5G20730,AT1G79700,AT4G18890,AT1G01080,AT5G59180,AT4G03190…
GO:BP	regulation of transcription, DNA-templated	GO:0006355	2.11e-08	2474	488	AT1G80460,AT4G13980,AT1G44810,AT5G58900,AT1G08970,AT3G18035,AT4G32620,AT5G03220,AT2G30620,AT3G24050,AT1G18330,AT2G47900,AT3G15500,AT1G32360,AT3G15510,AT1G76350,AT3G15540,AT5G18600,AT1G69570,AT1G12860,AT1G53230,AT4G14540,AT1G13450,AT2G42200,AT5G28770,AT2G33310,AT3G23210,AT1G64860,AT5G20730,AT1G79700,AT4G18890,AT4G03190,AT5G44260,AT4G18880,AT3G50060,AT2G42280,AT2G02060,AT1G51060,AT5G59140,AT5G08070…
GO:BP	carbohydrate metabolic process	GO:0005975	2.41e-08	1212	267	AT1G80460,AT4G09510,AT4G36890,AT5G18670,AT2G20370,AT5G65730,AT3G17770,AT1G74380,AT5G58000,AT4G19820,AT3G63010,AT1G70090,AT1G62660,AT5G15650,AT3G02040,AT2G35610,AT2G35620,AT1G03310,AT2G05320,AT3G03050,AT4G16650,AT1G77460,AT5G50420,AT1G04430,AT1G06780,AT3G14570,AT1G66250,AT4G17770,AT1G24280,AT5G04040,AT5G58090,AT5G04885,AT3G01640,AT4G18030,AT4G18010,AT5G56630,AT4G39770,AT3G04120,AT2G18700,AT1G18270…
GO:BP	regulation of cellular biosynthetic process	GO:0031326	2.71e-08	2827	547	AT1G80460,AT4G13980,AT1G44810,AT5G58900,AT1G08970,AT3G18035,AT4G32620,AT3G08720,AT5G03220,AT2G30620,AT3G24050,AT1G18330,AT2G47900,AT3G15500,AT1G32360,AT5G42750,AT3G15510,AT1G76350,AT3G15540,AT5G18600,AT1G69570,AT1G12860,AT1G53230,AT1G31280,AT2G45810,AT1G20780,AT4G14540,AT1G13450,AT2G42200,AT5G28770,AT2G33310,AT3G23210,AT1G64860,AT5G20730,AT1G79700,AT4G18890,AT1G01080,AT5G59180,AT4G03190,AT5G44260…
GO:BP	post-embryonic development	GO:0009791	3.15e-08	1584	333	AT4G28860,AT1G18390,AT1G75220,AT4G28880,AT4G36890,AT1G08970,AT5G37770,AT2G17780,AT5G49160,AT3G15510,AT3G51630,AT3G63010,AT2G23070,AT3G15540,AT1G70070,AT4G36810,AT1G69570,AT1G12860,AT3G18830,AT2G35620,AT3G55610,AT2G42200,AT3G23210,AT5G20730,AT1G63700,AT3G03090,AT3G50060,AT2G42280,AT2G23950,AT1G04400,AT3G50070,AT2G17820,AT3G61880,AT3G24770,AT4G03110,AT2G01570,AT4G18010,AT3G04120,AT2G46590,AT3G08640…
GO:BP	regulation of RNA biosynthetic process	GO:2001141	3.53e-08	2488	489	AT1G80460,AT4G13980,AT1G44810,AT5G58900,AT1G08970,AT3G18035,AT4G32620,AT5G03220,AT2G30620,AT3G24050,AT1G18330,AT2G47900,AT3G15500,AT1G32360,AT3G15510,AT1G76350,AT3G15540,AT5G18600,AT1G69570,AT1G12860,AT1G53230,AT4G14540,AT1G13450,AT2G42200,AT5G28770,AT2G33310,AT3G23210,AT1G64860,AT5G20730,AT1G79700,AT4G18890,AT4G03190,AT5G44260,AT4G18880,AT3G50060,AT2G42280,AT2G02060,AT1G51060,AT5G59140,AT5G08070…
GO:BP	regulation of nucleic acid-templated transcription	GO:1903506	3.53e-08	2488	489	AT1G80460,AT4G13980,AT1G44810,AT5G58900,AT1G08970,AT3G18035,AT4G32620,AT5G03220,AT2G30620,AT3G24050,AT1G18330,AT2G47900,AT3G15500,AT1G32360,AT3G15510,AT1G76350,AT3G15540,AT5G18600,AT1G69570,AT1G12860,AT1G53230,AT4G14540,AT1G13450,AT2G42200,AT5G28770,AT2G33310,AT3G23210,AT1G64860,AT5G20730,AT1G79700,AT4G18890,AT4G03190,AT5G44260,AT4G18880,AT3G50060,AT2G42280,AT2G02060,AT1G51060,AT5G59140,AT5G08070…
GO:BP	response to stress	GO:0006950	4.68e-08	3892	722	AT1G80460,AT1G18390,AT4G13980,AT1G73660,AT5G37770,AT2G41100,AT5G56550,AT4G32620,AT1G73680,AT5G54250,AT3G10985,AT5G65730,AT3G08720,AT1G80420,AT1G18330,AT1G15530,AT2G46450,AT2G47900,AT2G46440,AT3G15500,AT5G09990,AT2G37860,AT1G53210,AT1G62660,AT3G27690,AT5G15650,AT3G28200,AT1G12860,AT3G02040,AT1G11210,AT1G67360,AT1G31280,AT5G18650,AT2G25620,AT3G19130,AT1G02270,AT4G21150,AT5G53170,AT5G37720,AT5G28770…
GO:BP	regulation of cellular metabolic process	GO:0031323	9.03e-08	3479	652	AT1G80460,AT4G13980,AT1G44810,AT5G58900,AT1G08970,AT5G37770,AT3G18035,AT1G80440,AT4G32620,AT3G26030,AT3G08720,AT5G03220,AT2G30620,AT3G24050,AT1G80420,AT1G18330,AT2G47900,AT3G15500,AT1G32360,AT5G42750,AT3G15510,AT1G76350,AT1G49620,AT3G27690,AT3G15540,AT2G32710,AT5G18600,AT1G69570,AT1G12860,AT3G19150,AT1G53230,AT1G31280,AT5G18650,AT2G45810,AT1G20780,AT4G14540,AT1G13450,AT5G53160,AT2G42200,AT5G28770…
GO:BP	cellular macromolecule metabolic process	GO:0044260	9.32e-08	7552	1303	AT4G28860,AT5G25350,AT1G80460,AT1G14030,AT1G18390,AT4G13980,AT1G44810,AT5G58900,AT5G11430,AT5G22050,AT1G73660,AT1G16110,AT4G13990,AT4G28880,AT4G36890,AT1G08970,AT2G35680,AT3G18035,AT2G30600,AT4G32620,AT2G20370,AT3G26030,AT5G65730,AT3G08720,AT3G10910,AT5G03220,AT2G30620,AT1G76390,AT3G24050,AT5G49160,AT1G80420,AT1G18330,AT1G15530,AT1G74380,AT2G47900,AT5G38895,AT4G38520,AT4G09560,AT3G15500,AT3G63030…
GO:BP	response to radiation	GO:0009314	9.56e-08	793	187	AT4G28860,AT1G18390,AT4G28880,AT1G08970,AT5G37770,AT2G41100,AT3G51630,AT2G23070,AT2G37860,AT3G27690,AT1G69570,AT1G64860,AT5G20730,AT5G08020,AT1G29300,AT4G01660,AT2G42280,AT1G04400,AT4G03110,AT5G43760,AT2G01570,AT2G46590,AT3G08640,AT4G08920,AT1G14920,AT1G53380,AT5G09810,AT2G26640,AT5G22830,AT3G45640,AT3G62410,AT4G36930,AT2G18790,AT5G64330,AT5G08130,AT4G16780,AT1G51140,AT1G10670,AT1G05630,AT1G42550…
GO:BP	regulation of cellular macromolecule biosynthetic process	GO:2000112	9.93e-08	2718	525	AT1G80460,AT4G13980,AT1G44810,AT5G58900,AT1G08970,AT3G18035,AT4G32620,AT3G08720,AT5G03220,AT2G30620,AT3G24050,AT1G18330,AT2G47900,AT3G15500,AT1G32360,AT3G15510,AT1G76350,AT3G15540,AT5G18600,AT1G69570,AT1G12860,AT1G53230,AT1G31280,AT2G45810,AT4G14540,AT1G13450,AT2G42200,AT5G28770,AT2G33310,AT3G23210,AT1G64860,AT5G20730,AT1G79700,AT4G18890,AT1G01080,AT5G59180,AT4G03190,AT5G44260,AT4G18880,AT3G50060…
GO:BP	multicellular organismal process	GO:0032501	1.13e-07	3103	589	AT4G28860,AT1G72150,AT1G18390,AT1G75220,AT3G63088,AT4G09510,AT4G28880,AT4G36890,AT1G08970,AT5G37770,AT2G17780,AT1G73680,AT3G10985,AT5G49160,AT1G74380,AT3G15510,AT3G51630,AT3G63010,AT2G23070,AT2G37860,AT3G15540,AT1G70070,AT5G15650,AT4G36810,AT1G69570,AT1G73600,AT4G08850,AT1G12860,AT3G18830,AT2G35610,AT1G67360,AT1G53230,AT2G35620,AT4G37450,AT1G20780,AT5G49830,AT3G55610,AT3G62500,AT2G42200,AT1G01880…
GO:BP	phosphate-containing compound metabolic process	GO:0006796	1.2e-07	2484	485	AT4G28860,AT4G34640,AT1G80460,AT1G18390,AT5G22050,AT1G73660,AT1G16110,AT4G19860,AT4G28880,AT2G35680,AT3G26030,AT3G08720,AT3G17770,AT1G80420,AT1G15530,AT4G38520,AT5G42750,AT4G35780,AT1G68400,AT3G51630,AT2G23070,AT1G49620,AT5G40540,AT1G76360,AT4G14580,AT2G32710,AT4G36810,AT1G73600,AT4G08850,AT3G02040,AT3G09820,AT3G19150,AT2G35620,AT3G06270,AT5G53140,AT2G25620,AT3G55610,AT5G53160,AT3G50000,AT5G59160…
GO:BP	regulation of macromolecule biosynthetic process	GO:0010556	1.9e-07	2741	527	AT1G80460,AT4G13980,AT1G44810,AT5G58900,AT1G08970,AT3G18035,AT4G32620,AT3G08720,AT5G03220,AT2G30620,AT3G24050,AT1G18330,AT2G47900,AT3G15500,AT1G32360,AT3G15510,AT1G76350,AT3G15540,AT5G18600,AT1G69570,AT1G12860,AT1G53230,AT1G31280,AT2G45810,AT4G14540,AT1G13450,AT2G42200,AT5G28770,AT2G33310,AT3G23210,AT1G64860,AT5G20730,AT1G79700,AT4G18890,AT1G01080,AT5G59180,AT4G03190,AT5G44260,AT4G18880,AT3G50060…
GO:BP	cellular response to oxygen-containing compound	GO:1901701	3.4e-07	810	188	AT1G18390,AT1G73660,AT1G08970,AT2G20370,AT4G36830,AT3G15500,AT5G42750,AT3G63010,AT2G23070,AT1G62660,AT3G27690,AT4G13930,AT5G53160,AT5G28770,AT3G23210,AT4G18890,AT3G03990,AT2G23950,AT3G60320,AT4G02060,AT2G22430,AT2G17820,AT3G20660,AT4G03110,AT5G04870,AT2G27090,AT3G04110,AT1G22070,AT2G01570,AT4G18010,AT2G41140,AT2G46590,AT3G09770,AT4G08920,AT1G14920,AT4G35890,AT2G19860,AT3G45640,AT1G32440,AT2G18790…
GO:BP	regulation of RNA metabolic process	GO:0051252	3.58e-07	2615	504	AT1G80460,AT4G13980,AT1G44810,AT5G58900,AT1G08970,AT3G18035,AT4G32620,AT5G03220,AT2G30620,AT3G24050,AT1G18330,AT2G47900,AT3G15500,AT1G32360,AT3G15510,AT1G76350,AT3G15540,AT5G18600,AT1G69570,AT1G12860,AT1G53230,AT4G14540,AT1G13450,AT2G42200,AT5G28770,AT2G33310,AT3G23210,AT1G64860,AT5G20730,AT1G79700,AT4G18890,AT1G01080,AT5G59180,AT4G03190,AT5G44260,AT4G18880,AT3G50060,AT2G42280,AT2G02060,AT1G51060…
GO:BP	regulation of nucleobase-containing compound metabolic process	GO:0019219	6.15e-07	2678	513	AT1G80460,AT4G13980,AT1G44810,AT5G58900,AT1G08970,AT3G18035,AT4G32620,AT5G03220,AT2G30620,AT3G24050,AT1G80420,AT1G18330,AT2G47900,AT3G15500,AT1G32360,AT3G15510,AT1G76350,AT3G15540,AT5G18600,AT1G69570,AT1G12860,AT1G53230,AT4G14540,AT1G13450,AT2G42200,AT5G28770,AT2G33310,AT3G23210,AT1G64860,AT5G20730,AT1G79700,AT4G18890,AT1G01080,AT5G59180,AT4G03190,AT5G44260,AT4G18880,AT3G50060,AT2G42280,AT2G02060…
GO:BP	organic substance biosynthetic process	GO:1901576	7.42e-07	5653	996	AT4G34640,AT1G80460,AT4G13980,AT1G44810,AT5G58900,AT5G11430,AT4G13990,AT4G36890,AT1G08970,AT3G18035,AT2G43360,AT4G32620,AT1G73680,AT1G08980,AT2G20370,AT4G36830,AT3G08720,AT5G03220,AT2G30620,AT3G24050,AT1G62640,AT1G18330,AT1G74380,AT2G47900,AT1G55880,AT3G15500,AT1G32360,AT5G42750,AT3G15510,AT4G26940,AT1G28680,AT1G19440,AT1G76350,AT3G63010,AT1G70090,AT1G60550,AT3G15540,AT5G15650,AT5G18600,AT4G36810…
GO:BP	organic cyclic compound biosynthetic process	GO:1901362	1.16e-06	3462	641	AT4G34640,AT1G80460,AT4G13980,AT1G44810,AT5G58900,AT5G11430,AT1G08970,AT3G18035,AT2G43360,AT4G32620,AT1G08980,AT5G03220,AT2G30620,AT3G24050,AT1G18330,AT2G47900,AT3G15500,AT1G32360,AT5G42750,AT3G15510,AT1G28680,AT1G76350,AT3G15540,AT5G18600,AT1G69570,AT1G12860,AT3G09820,AT1G53230,AT1G20780,AT4G14540,AT1G13450,AT3G55610,AT2G42200,AT5G28770,AT2G33310,AT3G23210,AT1G64860,AT5G20730,AT1G79700,AT4G18890…
GO:BP	cell wall pectin metabolic process	GO:0052546	1.26e-06	60	29	AT4G36890,AT2G35610,AT1G04430,AT4G18030,AT1G29470,AT1G15690,AT5G15740,AT3G23300,AT3G21190,AT5G15470,AT1G77260,AT2G43200,AT2G40280,AT4G19120,AT5G64030,AT1G26850,AT2G03480,AT3G25140,AT1G13860,AT1G18580,AT3G56080,AT3G61130,AT4G00740,AT4G00750,AT4G04920,AT3G29360,AT2G34300,AT1G51630,AT4G01220
GO:BP	transcription, DNA-templated	GO:0006351	1.66e-06	2618	500	AT1G80460,AT4G13980,AT1G44810,AT5G58900,AT5G11430,AT1G08970,AT3G18035,AT4G32620,AT5G03220,AT2G30620,AT3G24050,AT1G18330,AT2G47900,AT3G15500,AT1G32360,AT3G15510,AT1G76350,AT3G15540,AT5G18600,AT1G69570,AT1G12860,AT1G53230,AT4G14540,AT1G13450,AT2G42200,AT5G28770,AT2G33310,AT3G23210,AT1G64860,AT5G20730,AT1G79700,AT4G18890,AT5G59180,AT4G03190,AT5G44260,AT4G18880,AT3G50060,AT2G42280,AT2G02060,AT1G51060…
GO:BP	heterocycle biosynthetic process	GO:0018130	1.88e-06	3271	608	AT1G80460,AT4G13980,AT1G44810,AT5G58900,AT5G11430,AT1G08970,AT3G18035,AT2G43360,AT4G32620,AT1G08980,AT5G03220,AT2G30620,AT3G24050,AT1G18330,AT2G47900,AT3G15500,AT1G32360,AT3G15510,AT1G28680,AT1G76350,AT3G15540,AT5G18600,AT1G69570,AT1G12860,AT3G09820,AT1G53230,AT1G20780,AT4G14540,AT1G13450,AT3G55610,AT2G42200,AT5G28770,AT2G33310,AT3G23210,AT1G64860,AT5G20730,AT1G79700,AT4G18890,AT5G08020,AT5G59180…
GO:BP	biosynthetic process	GO:0009058	2.34e-06	5814	1017	AT4G34640,AT1G80460,AT4G13980,AT1G44810,AT5G58900,AT5G11430,AT4G13990,AT4G36890,AT1G08970,AT3G18035,AT2G43360,AT4G32620,AT1G73680,AT1G08980,AT2G20370,AT4G36830,AT5G22020,AT3G08720,AT5G03220,AT2G30620,AT3G24050,AT1G62640,AT1G18330,AT1G74380,AT2G47900,AT1G55880,AT3G15500,AT1G32360,AT5G42750,AT3G15510,AT4G26940,AT1G28680,AT1G19440,AT1G76350,AT3G63010,AT1G70090,AT1G60550,AT3G27690,AT3G15540,AT5G15650…
GO:BP	RNA biosynthetic process	GO:0032774	2.46e-06	2655	505	AT1G80460,AT4G13980,AT1G44810,AT5G58900,AT5G11430,AT1G08970,AT3G18035,AT4G32620,AT5G03220,AT2G30620,AT3G24050,AT1G18330,AT2G47900,AT3G15500,AT1G32360,AT3G15510,AT1G76350,AT3G15540,AT5G18600,AT1G69570,AT1G12860,AT1G53230,AT4G14540,AT1G13450,AT2G42200,AT5G28770,AT2G33310,AT3G23210,AT1G64860,AT5G20730,AT1G79700,AT4G18890,AT5G59180,AT4G03190,AT5G44260,AT4G18880,AT3G50060,AT2G42280,AT2G02060,AT1G51060…
GO:BP	regulation of seedling development	GO:1900140	2.85e-06	87	36	AT1G75220,AT1G08970,AT2G23070,AT3G23210,AT2G01570,AT2G46590,AT1G14920,AT4G36930,AT2G18790,AT1G42550,AT1G07240,AT1G16060,AT2G20180,AT5G53000,AT5G35750,AT3G06500,AT3G47620,AT1G05010,AT1G66350,AT5G66880,AT2G42620,AT5G56860,AT3G03450,AT4G39400,AT2G43820,AT2G37678,AT2G46690,AT1G27320,AT5G53470,AT2G47790,AT5G39610,AT5G56030,AT5G63470,AT2G01830,AT5G66730,AT4G26150
GO:BP	homeostatic process	GO:0042592	2.97e-06	660	156	AT1G75220,AT3G25580,AT2G26710,AT2G35690,AT3G08710,AT5G54290,AT1G53210,AT3G27690,AT5G18600,AT3G02040,AT4G29670,AT5G28770,AT3G23210,AT5G08020,AT2G23950,AT1G04400,AT5G63530,AT3G04110,AT3G09770,AT4G08920,AT1G14920,AT3G17630,AT1G14130,AT4G20140,AT2G19860,AT5G22830,AT2G45700,AT2G18790,AT5G48450,AT1G69690,AT1G50460,AT1G53300,AT5G39865,AT4G22330,AT2G38270,AT3G19270,AT5G28030,AT5G61440,AT1G05630,AT4G21990…
GO:BP	nucleic acid-templated transcription	GO:0097659	3.22e-06	2630	500	AT1G80460,AT4G13980,AT1G44810,AT5G58900,AT5G11430,AT1G08970,AT3G18035,AT4G32620,AT5G03220,AT2G30620,AT3G24050,AT1G18330,AT2G47900,AT3G15500,AT1G32360,AT3G15510,AT1G76350,AT3G15540,AT5G18600,AT1G69570,AT1G12860,AT1G53230,AT4G14540,AT1G13450,AT2G42200,AT5G28770,AT2G33310,AT3G23210,AT1G64860,AT5G20730,AT1G79700,AT4G18890,AT5G59180,AT4G03190,AT5G44260,AT4G18880,AT3G50060,AT2G42280,AT2G02060,AT1G51060…
GO:BP	phosphorylation	GO:0016310	3.49e-06	1752	351	AT4G28860,AT1G80460,AT1G18390,AT5G22050,AT1G73660,AT1G16110,AT4G28880,AT3G26030,AT3G08720,AT3G17770,AT1G15530,AT5G42750,AT4G35780,AT1G68400,AT3G51630,AT2G23070,AT1G49620,AT5G40540,AT1G76360,AT4G14580,AT2G32710,AT4G08850,AT3G09820,AT3G19150,AT2G35620,AT3G55610,AT3G50000,AT1G71410,AT1G63700,AT1G04440,AT1G07870,AT4G01660,AT3G49590,AT2G23950,AT2G22490,AT1G04400,AT3G50070,AT4G15530,AT2G17820,AT4G02010…
GO:BP	regulation of primary metabolic process	GO:0080090	4.21e-06	3336	616	AT1G80460,AT4G13980,AT1G44810,AT5G58900,AT1G08970,AT3G18035,AT4G32620,AT3G26030,AT3G08720,AT5G03220,AT2G30620,AT3G24050,AT1G80420,AT1G18330,AT2G47900,AT3G15500,AT1G32360,AT5G42750,AT3G15510,AT1G76350,AT1G49620,AT3G15540,AT2G32710,AT5G18600,AT1G69570,AT1G12860,AT3G19150,AT1G53230,AT1G31280,AT5G18650,AT2G45810,AT1G20780,AT4G14540,AT1G13450,AT5G53160,AT2G42200,AT5G28770,AT2G33310,AT3G23210,AT1G64860…
GO:BP	cellular response to acid chemical	GO:0071229	4.73e-06	601	144	AT1G18390,AT1G08970,AT2G20370,AT4G36830,AT3G15500,AT3G63010,AT2G23070,AT1G62660,AT3G27690,AT4G13930,AT5G53160,AT5G28770,AT3G60320,AT2G22430,AT2G17820,AT3G20660,AT4G03110,AT5G04870,AT2G27090,AT3G04110,AT1G22070,AT2G01570,AT4G18010,AT2G41140,AT2G46590,AT3G09770,AT1G14920,AT4G35890,AT3G45640,AT2G18790,AT1G53300,AT5G53060,AT3G48040,AT4G22330,AT3G06380,AT4G30410,AT3G19290,AT1G42550,AT1G56650,AT1G64060…
GO:BP	cellular response to oxygen levels	GO:0071453	7.28e-06	240	71	AT2G41100,AT3G08720,AT3G02040,AT1G67360,AT1G07870,AT1G55810,AT4G27470,AT2G22500,AT1G23710,AT4G27450,AT2G40000,AT1G66080,AT3G62410,AT1G13360,AT4G38470,AT5G42050,AT4G32480,AT1G13260,AT3G24500,AT5G54470,AT1G68670,AT1G76560,AT5G19120,AT1G14200,AT2G18670,AT4G24160,AT3G56400,AT1G03610,AT1G26800,AT1G25550,AT3G60520,AT1G25560,AT2G01150,AT1G72910,AT3G10020,AT2G36800,AT1G72940,AT2G41010,AT2G41090,AT5G65207…
GO:BP	cellular response to decreased oxygen levels	GO:0036294	7.28e-06	240	71	AT2G41100,AT3G08720,AT3G02040,AT1G67360,AT1G07870,AT1G55810,AT4G27470,AT2G22500,AT1G23710,AT4G27450,AT2G40000,AT1G66080,AT3G62410,AT1G13360,AT4G38470,AT5G42050,AT4G32480,AT1G13260,AT3G24500,AT5G54470,AT1G68670,AT1G76560,AT5G19120,AT1G14200,AT2G18670,AT4G24160,AT3G56400,AT1G03610,AT1G26800,AT1G25550,AT3G60520,AT1G25560,AT2G01150,AT1G72910,AT3G10020,AT2G36800,AT1G72940,AT2G41010,AT2G41090,AT5G65207…
GO:BP	chemical homeostasis	GO:0048878	7.58e-06	450	114	AT1G75220,AT2G26710,AT2G35690,AT1G53210,AT3G27690,AT3G02040,AT5G28770,AT3G23210,AT1G04400,AT5G63530,AT3G04110,AT3G09770,AT4G08920,AT1G14920,AT3G17630,AT1G14130,AT4G20140,AT2G19860,AT5G22830,AT2G18790,AT5G48450,AT1G69690,AT1G50460,AT4G22330,AT3G19270,AT5G28030,AT1G05630,AT1G21270,AT1G42550,AT1G64060,AT1G07240,AT1G45249,AT5G13740,AT2G47160,AT5G58700,AT1G68670,AT4G28630,AT3G06483,AT4G24120,AT1G01580…
GO:BP	nucleobase-containing compound biosynthetic process	GO:0034654	9.7e-06	3043	565	AT1G80460,AT4G13980,AT1G44810,AT5G58900,AT5G11430,AT1G08970,AT3G18035,AT4G32620,AT5G03220,AT2G30620,AT3G24050,AT1G18330,AT2G47900,AT3G15500,AT1G32360,AT3G15510,AT1G76350,AT3G15540,AT5G18600,AT1G69570,AT1G12860,AT3G09820,AT1G53230,AT4G14540,AT1G13450,AT2G42200,AT5G28770,AT2G33310,AT3G23210,AT1G64860,AT5G20730,AT1G79700,AT4G18890,AT5G08020,AT5G59180,AT4G03190,AT5G44260,AT4G18880,AT3G50060,AT2G42280…
GO:BP	regulation of macromolecule metabolic process	GO:0060255	9.79e-06	3531	645	AT1G80460,AT4G13980,AT1G44810,AT5G58900,AT1G08970,AT3G18035,AT4G32620,AT3G26030,AT3G08720,AT5G03220,AT2G30620,AT3G24050,AT5G49160,AT1G80420,AT1G18330,AT2G47900,AT3G15500,AT1G32360,AT5G42750,AT3G15510,AT1G76350,AT3G63010,AT1G49620,AT3G15540,AT2G32710,AT1G70070,AT5G18600,AT1G69570,AT1G12860,AT3G19150,AT1G53230,AT1G31280,AT5G18650,AT2G45810,AT4G14540,AT1G13450,AT5G53160,AT2G42200,AT5G28770,AT2G33310…
GO:BP	response to alcohol	GO:0097305	1.01e-05	650	152	AT1G18390,AT1G08970,AT5G37770,AT4G36830,AT2G23070,AT1G62660,AT3G27690,AT4G22200,AT5G53160,AT5G28770,AT2G22430,AT3G61890,AT2G17820,AT5G04870,AT3G04110,AT2G01570,AT4G18010,AT2G41140,AT3G09770,AT1G14920,AT4G35890,AT4G28080,AT3G45640,AT4G08980,AT1G53300,AT3G48040,AT4G22330,AT3G55730,AT3G06380,AT2G38280,AT4G27410,AT3G60240,AT3G19290,AT1G05630,AT1G42550,AT1G64060,AT4G17870,AT4G01026,AT1G16060,AT1G45249…
GO:BP	regulation of response to stimulus	GO:0048583	1.02e-05	768	174	AT5G25350,AT1G08970,AT1G80440,AT3G63010,AT2G23070,AT1G69570,AT1G67360,AT5G18650,AT2G25620,AT5G53160,AT1G63700,AT3G50060,AT1G04400,AT1G51090,AT2G22430,AT2G47000,AT1G78570,AT4G03110,AT2G01570,AT5G18340,AT3G18165,AT4G08920,AT1G14920,AT1G15670,AT3G45640,AT4G14465,AT2G18790,AT1G53300,AT2G45000,AT5G53060,AT3G48040,AT1G09415,AT5G08130,AT3G29160,AT1G42550,AT1G08390,AT1G01960,AT2G25490,AT4G17870,AT3G51480…
GO:BP	response to carbohydrate	GO:0009743	1.03e-05	165	54	AT1G73660,AT5G28770,AT3G23210,AT5G20700,AT4G02060,AT2G22490,AT3G04120,AT2G19860,AT3G62410,AT3G29160,AT1G05630,AT1G56650,AT1G69780,AT1G45249,AT1G22160,AT1G77180,AT4G02280,AT5G01820,AT1G20950,AT1G79550,AT2G28900,AT2G39990,AT4G34590,AT1G49010,AT3G48360,AT3G16690,AT4G00238,AT2G41870,AT4G17670,AT5G03650,AT4G15900,AT4G15920,AT2G24150,AT4G29130,AT2G13600,AT1G28330,AT3G13450,AT5G49450,AT5G47060,AT5G56860…
GO:BP	regulation of seed germination	GO:0010029	1.06e-05	83	34	AT1G75220,AT1G08970,AT2G23070,AT3G23210,AT2G01570,AT2G46590,AT1G14920,AT4G36930,AT2G18790,AT1G42550,AT1G07240,AT1G16060,AT2G20180,AT5G53000,AT5G35750,AT3G06500,AT3G47620,AT1G05010,AT1G66350,AT5G66880,AT2G42620,AT5G56860,AT3G03450,AT2G43820,AT2G37678,AT1G27320,AT5G53470,AT2G47790,AT5G39610,AT5G56030,AT5G63470,AT2G01830,AT5G66730,AT4G26150
GO:BP	aromatic compound biosynthetic process	GO:0019438	1.17e-05	3339	613	AT1G80460,AT4G13980,AT1G44810,AT5G58900,AT5G11430,AT1G08970,AT3G18035,AT4G32620,AT1G08980,AT5G03220,AT2G30620,AT3G24050,AT1G18330,AT2G47900,AT3G15500,AT1G32360,AT3G15510,AT1G28680,AT1G76350,AT3G15540,AT5G18600,AT1G69570,AT1G12860,AT3G09820,AT1G53230,AT1G20780,AT4G14540,AT1G13450,AT2G42200,AT5G28770,AT2G33310,AT3G23210,AT1G64860,AT5G20730,AT1G79700,AT4G18890,AT5G08020,AT5G59180,AT4G03190,AT5G44260…
GO:BP	response to abscisic acid	GO:0009737	1.17e-05	646	151	AT1G18390,AT1G08970,AT5G37770,AT4G36830,AT2G23070,AT1G62660,AT3G27690,AT4G22200,AT5G53160,AT5G28770,AT2G22430,AT3G61890,AT2G17820,AT5G04870,AT3G04110,AT2G01570,AT4G18010,AT2G41140,AT3G09770,AT1G14920,AT4G35890,AT4G28080,AT3G45640,AT4G08980,AT1G53300,AT3G48040,AT4G22330,AT3G55730,AT3G06380,AT2G38280,AT4G27410,AT3G60240,AT3G19290,AT1G05630,AT1G42550,AT1G64060,AT4G17870,AT4G01026,AT1G16060,AT1G45249…
GO:BP	regulation of developmental process	GO:0050793	1.18e-05	764	173	AT1G75220,AT1G08970,AT5G37770,AT5G03220,AT5G49160,AT3G15510,AT2G23070,AT1G69570,AT1G53230,AT2G42200,AT3G23210,AT1G77460,AT3G03090,AT2G23950,AT5G08070,AT1G04400,AT1G05520,AT3G14570,AT4G03110,AT2G01570,AT2G46590,AT4G08920,AT1G14920,AT4G12970,AT4G20140,AT5G65810,AT5G49020,AT4G36930,AT2G18790,AT3G62420,AT5G10480,AT4G36920,AT3G48040,AT5G01170,AT5G64360,AT3G19290,AT1G10670,AT4G01500,AT1G17145,AT1G42550…
GO:BP	small molecule metabolic process	GO:0044281	1.27e-05	1883	370	AT4G34640,AT1G80460,AT2G43360,AT2G35690,AT1G73680,AT1G08980,AT2G20370,AT4G36830,AT3G17770,AT1G62640,AT3G08710,AT1G55880,AT1G19440,AT1G60550,AT5G15650,AT3G02040,AT3G09820,AT1G19400,AT1G20780,AT3G55610,AT1G43710,AT4G13930,AT1G79700,AT4G16650,AT2G02010,AT4G01660,AT5G50420,AT1G08250,AT4G00570,AT1G04400,AT5G05590,AT5G16370,AT4G15530,AT2G36310,AT1G24280,AT5G04040,AT3G01640,AT1G55810,AT1G78570,AT5G43760…
GO:BP	protein ubiquitination	GO:0016567	1.33e-05	825	184	AT5G25350,AT2G30600,AT3G10910,AT1G76390,AT5G38895,AT4G09560,AT5G22920,AT5G18650,AT1G20780,AT1G67340,AT4G02075,AT3G50840,AT4G03190,AT3G18773,AT2G39720,AT5G45360,AT5G59140,AT1G21780,AT1G55000,AT1G45180,AT5G18340,AT3G08660,AT4G27470,AT5G49980,AT3G09770,AT3G06330,AT4G19700,AT4G07400,AT3G55070,AT4G30400,AT4G08980,AT5G64330,AT1G12760,AT1G76410,AT5G01880,AT3G06380,AT5G57740,AT2G01620,AT1G17145,AT1G17970…
GO:BP	response to decreased oxygen levels	GO:0036293	1.4e-05	267	76	AT2G41100,AT3G08720,AT3G02040,AT1G67360,AT1G07870,AT1G55810,AT4G27470,AT2G22500,AT1G23710,AT4G27450,AT2G40000,AT1G66080,AT3G62410,AT1G13360,AT4G38470,AT5G42050,AT4G32480,AT1G13260,AT3G24500,AT5G54470,AT1G68670,AT3G28910,AT1G76560,AT5G19120,AT1G14200,AT2G18670,AT4G24160,AT3G56400,AT1G03610,AT1G26800,AT1G25550,AT3G60520,AT1G25560,AT2G01150,AT1G72910,AT3G10020,AT2G36800,AT1G72940,AT2G41010,AT1G64280…
GO:BP	response to osmotic stress	GO:0006970	1.44e-05	696	160	AT1G73660,AT3G08720,AT1G18330,AT2G47900,AT1G53210,AT1G62660,AT5G15650,AT3G49580,AT3G61890,AT2G17820,AT4G39730,AT2G01570,AT3G04120,AT5G43170,AT1G14920,AT5G17920,AT3G45640,AT3G62420,AT1G50460,AT1G49510,AT1G53300,AT1G15690,AT2G39770,AT5G53060,AT4G22330,AT3G55730,AT3G19290,AT2G39800,AT1G42550,AT1G56650,AT1G64060,AT1G16060,AT1G45249,AT4G01070,AT4G32410,AT1G56600,AT1G22190,AT5G65010,AT3G17510,AT4G11150…
GO:BP	pectin biosynthetic process	GO:0045489	1.62e-05	55	26	AT4G36890,AT1G70090,AT2G35610,AT1G06780,AT5G65810,AT1G19300,AT5G15740,AT4G02130,AT3G21190,AT3G02250,AT5G33290,AT5G15470,AT2G33570,AT5G47780,AT3G49720,AT3G02350,AT3G25140,AT3G58790,AT2G35100,AT1G18580,AT3G61130,AT2G38650,AT1G24170,AT5G06700,AT1G51630,AT4G01220
GO:BP	response to oxygen levels	GO:0070482	1.67e-05	268	76	AT2G41100,AT3G08720,AT3G02040,AT1G67360,AT1G07870,AT1G55810,AT4G27470,AT2G22500,AT1G23710,AT4G27450,AT2G40000,AT1G66080,AT3G62410,AT1G13360,AT4G38470,AT5G42050,AT4G32480,AT1G13260,AT3G24500,AT5G54470,AT1G68670,AT3G28910,AT1G76560,AT5G19120,AT1G14200,AT2G18670,AT4G24160,AT3G56400,AT1G03610,AT1G26800,AT1G25550,AT3G60520,AT1G25560,AT2G01150,AT1G72910,AT3G10020,AT2G36800,AT1G72940,AT2G41010,AT1G64280…
GO:BP	protein phosphorylation	GO:0006468	1.86e-05	1287	266	AT4G28860,AT1G18390,AT5G22050,AT1G73660,AT1G16110,AT4G28880,AT3G26030,AT3G08720,AT1G15530,AT5G42750,AT4G35780,AT1G68400,AT3G51630,AT2G23070,AT1G49620,AT5G40540,AT1G76360,AT4G14580,AT2G32710,AT4G08850,AT3G19150,AT2G35620,AT3G50000,AT1G71410,AT1G63700,AT1G04440,AT1G07870,AT3G49590,AT2G23950,AT2G22490,AT3G50070,AT2G17820,AT4G02010,AT2G47060,AT4G24740,AT5G04870,AT2G41140,AT2G28250,AT4G08920,AT5G63610…
GO:BP	cellular response to stress	GO:0033554	2.07e-05	1317	271	AT1G18390,AT4G13980,AT2G41100,AT4G32620,AT5G54250,AT3G08720,AT1G80420,AT2G47900,AT1G53210,AT3G02040,AT1G67360,AT3G19130,AT5G28770,AT1G01880,AT1G63700,AT5G08020,AT5G07460,AT1G07870,AT3G49580,AT3G23255,AT4G18880,AT4G02060,AT3G20660,AT4G17770,AT1G16190,AT4G18820,AT4G24790,AT1G55810,AT4G03110,AT4G00550,AT1G22070,AT5G18340,AT4G27470,AT2G18700,AT2G22500,AT1G23710,AT4G08920,AT4G36990,AT5G62020,AT4G27450…
GO:BP	regulation of nitrogen compound metabolic process	GO:0051171	2.41e-05	3269	599	AT1G80460,AT4G13980,AT1G44810,AT5G58900,AT1G08970,AT5G37770,AT3G18035,AT4G32620,AT3G26030,AT3G08720,AT5G03220,AT2G30620,AT3G24050,AT1G80420,AT1G18330,AT2G47900,AT3G15500,AT1G32360,AT5G42750,AT3G15510,AT1G76350,AT1G49620,AT3G15540,AT2G32710,AT5G18600,AT1G69570,AT1G12860,AT3G19150,AT1G53230,AT1G31280,AT5G18650,AT2G45810,AT1G20780,AT4G14540,AT1G13450,AT5G53160,AT2G42200,AT5G28770,AT2G33310,AT3G23210…
GO:BP	polysaccharide biosynthetic process	GO:0000271	2.55e-05	228	67	AT4G36890,AT2G20370,AT1G74380,AT1G70090,AT2G35610,AT2G35620,AT1G03310,AT3G03050,AT1G77460,AT1G06780,AT3G14570,AT5G04885,AT5G65810,AT5G09870,AT1G19300,AT2G39770,AT1G12780,AT5G15740,AT1G10670,AT4G02130,AT3G21190,AT4G32410,AT2G32540,AT5G64020,AT3G02250,AT1G26810,AT5G33290,AT5G15470,AT2G33570,AT2G44610,AT5G47780,AT3G49720,AT3G06550,AT5G49720,AT4G39210,AT4G24010,AT3G02140,AT3G58560,AT3G29810,AT5G06610…
GO:BP	cellular response to hypoxia	GO:0071456	2.89e-05	238	69	AT2G41100,AT3G08720,AT3G02040,AT1G67360,AT1G07870,AT1G55810,AT4G27470,AT2G22500,AT1G23710,AT4G27450,AT2G40000,AT1G66080,AT1G13360,AT4G38470,AT5G42050,AT4G32480,AT1G13260,AT3G24500,AT5G54470,AT1G68670,AT5G19120,AT1G14200,AT2G18670,AT4G24160,AT3G56400,AT1G03610,AT1G26800,AT1G25550,AT3G60520,AT1G25560,AT2G01150,AT1G72910,AT3G10020,AT2G36800,AT1G72940,AT2G41010,AT2G41090,AT5G65207,AT1G68840,AT1G59660…
GO:BP	response to nutrient levels	GO:0031667	3.05e-05	243	70	AT5G28770,AT4G03190,AT3G49580,AT5G20700,AT4G00550,AT4G08920,AT3G52190,AT3G45640,AT3G62420,AT1G53310,AT5G61420,AT4G22330,AT1G05630,AT4G24670,AT1G22160,AT1G55920,AT3G06420,AT2G45170,AT4G33030,AT2G44670,AT5G18830,AT4G25350,AT5G21170,AT1G80760,AT3G47640,AT4G14680,AT1G78020,AT4G24800,AT1G64280,AT3G48390,AT3G16690,AT5G20410,AT4G17670,AT3G62980,AT4G15920,AT5G12200,AT3G08860,AT2G02470,AT3G05630,AT3G03520…
GO:BP	regulation of cell communication	GO:0010646	3.27e-05	350	92	AT5G25350,AT1G80440,AT3G63010,AT5G53160,AT1G63700,AT3G50060,AT2G22430,AT2G47000,AT1G78570,AT4G03110,AT2G01570,AT1G14920,AT1G15670,AT1G53300,AT2G45000,AT3G48040,AT1G42550,AT1G01960,AT2G25490,AT4G19660,AT3G16857,AT5G19920,AT1G74950,AT1G08720,AT4G37260,AT1G15380,AT4G33950,AT4G14713,AT3G56400,AT5G01810,AT2G33540,AT5G16530,AT5G53000,AT1G77220,AT1G08400,AT4G31550,AT4G39070,AT2G01150,AT1G24625,AT3G02140…
GO:BP	response to extracellular stimulus	GO:0009991	3.56e-05	282	78	AT1G18390,AT5G28770,AT4G03190,AT3G49580,AT5G20700,AT3G20660,AT4G00550,AT4G08920,AT3G52190,AT3G45640,AT3G62420,AT1G53310,AT5G61420,AT4G22330,AT3G25400,AT1G05630,AT4G24670,AT1G22160,AT1G55920,AT3G06420,AT2G45170,AT4G33030,AT2G44670,AT5G18830,AT4G25350,AT5G21170,AT1G80760,AT3G47640,AT4G14680,AT1G78020,AT4G24800,AT1G64280,AT3G48390,AT3G16690,AT5G20410,AT1G79410,AT4G17670,AT3G10550,AT2G20610,AT3G62980…
GO:BP	response to hypoxia	GO:0001666	3.67e-05	263	74	AT2G41100,AT3G08720,AT3G02040,AT1G67360,AT1G07870,AT1G55810,AT4G27470,AT2G22500,AT1G23710,AT4G27450,AT2G40000,AT1G66080,AT1G13360,AT4G38470,AT5G42050,AT4G32480,AT1G13260,AT3G24500,AT5G54470,AT1G68670,AT3G28910,AT5G19120,AT1G14200,AT2G18670,AT4G24160,AT3G56400,AT1G03610,AT1G26800,AT1G25550,AT3G60520,AT1G25560,AT2G01150,AT1G72910,AT3G10020,AT2G36800,AT1G72940,AT2G41010,AT1G64280,AT2G41090,AT5G65207…
GO:BP	regulation of signal transduction	GO:0009966	3.75e-05	341	90	AT5G25350,AT1G80440,AT3G63010,AT5G53160,AT1G63700,AT3G50060,AT2G22430,AT2G47000,AT1G78570,AT4G03110,AT2G01570,AT1G14920,AT1G15670,AT1G53300,AT2G45000,AT3G48040,AT1G42550,AT1G01960,AT2G25490,AT4G19660,AT3G16857,AT5G19920,AT1G74950,AT1G08720,AT4G37260,AT1G15380,AT4G33950,AT4G14713,AT3G56400,AT5G01810,AT2G33540,AT5G16530,AT5G53000,AT1G77220,AT1G08400,AT4G31550,AT4G39070,AT2G01150,AT1G24625,AT3G02140…
GO:BP	regulation of post-embryonic development	GO:0048580	3.75e-05	391	100	AT1G75220,AT1G08970,AT5G37770,AT5G49160,AT2G23070,AT1G69570,AT3G23210,AT3G03090,AT1G04400,AT4G03110,AT2G01570,AT2G46590,AT4G08920,AT1G14920,AT4G12970,AT5G49020,AT4G36930,AT2G18790,AT3G62420,AT4G36920,AT5G64360,AT1G10670,AT1G17145,AT1G42550,AT1G20823,AT1G07240,AT1G16060,AT2G43410,AT2G24790,AT3G16857,AT4G37295,AT1G13260,AT4G39100,AT1G21920,AT2G20180,AT1G77180,AT5G37055,AT2G42400,AT4G25350,AT5G53000…
GO:BP	regulation of signaling	GO:0023051	3.77e-05	346	91	AT5G25350,AT1G80440,AT3G63010,AT5G53160,AT1G63700,AT3G50060,AT2G22430,AT2G47000,AT1G78570,AT4G03110,AT2G01570,AT1G14920,AT1G15670,AT1G53300,AT2G45000,AT3G48040,AT1G42550,AT1G01960,AT2G25490,AT4G19660,AT3G16857,AT5G19920,AT1G74950,AT1G08720,AT4G37260,AT1G15380,AT4G33950,AT4G14713,AT3G56400,AT5G01810,AT2G33540,AT5G16530,AT5G53000,AT1G77220,AT1G08400,AT4G31550,AT4G39070,AT2G01150,AT1G24625,AT3G02140…
GO:BP	macromolecule modification	GO:0043412	3.82e-05	3598	651	AT4G28860,AT5G25350,AT1G14030,AT1G18390,AT5G22050,AT1G73660,AT1G16110,AT4G13990,AT4G28880,AT2G35680,AT2G30600,AT4G32620,AT2G20370,AT3G26030,AT3G08720,AT3G10910,AT1G76390,AT5G49160,AT1G80420,AT1G15530,AT5G38895,AT4G38520,AT4G09560,AT3G63030,AT5G42750,AT4G26940,AT4G35780,AT1G68400,AT3G51630,AT2G23070,AT1G49620,AT5G40540,AT5G22920,AT1G76360,AT3G27690,AT4G14580,AT2G32710,AT4G08850,AT2G35610,AT3G19150…
GO:BP	cellular carbohydrate biosynthetic process	GO:0034637	4.48e-05	231	67	AT4G36890,AT2G20370,AT1G74380,AT2G35610,AT2G35620,AT1G03310,AT3G03050,AT1G77460,AT3G14570,AT4G17770,AT5G04885,AT4G39770,AT2G18700,AT4G39800,AT5G09870,AT1G19300,AT2G39770,AT5G64380,AT1G12780,AT1G10670,AT3G21190,AT4G32410,AT4G39120,AT2G22190,AT2G32540,AT5G64020,AT1G26810,AT5G15470,AT2G44610,AT3G06550,AT5G65140,AT5G49720,AT4G39210,AT4G24010,AT3G02140,AT3G58560,AT3G29810,AT5G06610,AT4G12430,AT4G32190…
GO:BP	cellular biosynthetic process	GO:0044249	6.97e-05	5569	964	AT4G34640,AT1G80460,AT4G13980,AT1G44810,AT5G58900,AT5G11430,AT4G13990,AT4G36890,AT1G08970,AT3G18035,AT2G43360,AT4G32620,AT1G73680,AT1G08980,AT2G20370,AT4G36830,AT3G08720,AT5G03220,AT2G30620,AT3G24050,AT1G62640,AT1G18330,AT1G74380,AT2G47900,AT1G55880,AT3G15500,AT1G32360,AT5G42750,AT3G15510,AT4G26940,AT1G28680,AT1G19440,AT1G76350,AT1G60550,AT3G15540,AT5G18600,AT4G36810,AT1G69570,AT1G73600,AT1G12860…
GO:BP	cellular response to lipid	GO:0071396	9.3e-05	475	115	AT1G18390,AT1G08970,AT4G36830,AT5G42750,AT3G63010,AT2G23070,AT1G62660,AT3G27690,AT5G53160,AT5G28770,AT4G18890,AT3G03990,AT2G22430,AT2G17820,AT5G04870,AT3G04110,AT2G01570,AT4G18010,AT2G41140,AT3G09770,AT1G14920,AT4G35890,AT3G45640,AT1G53300,AT3G48040,AT4G22330,AT3G06380,AT5G10450,AT1G19350,AT4G30410,AT5G08130,AT3G19290,AT1G42550,AT1G64060,AT4G17870,AT4G01026,AT1G45249,AT2G38310,AT1G61380,AT1G08720…
GO:BP	organic acid metabolic process	GO:0006082	0.000110526	1289	262	AT1G80460,AT2G43360,AT2G35690,AT1G73680,AT1G08980,AT4G36830,AT1G62640,AT1G55880,AT1G19440,AT1G19400,AT1G20780,AT3G55610,AT1G43710,AT4G13930,AT1G79700,AT2G02010,AT1G08250,AT4G00570,AT5G05590,AT5G16370,AT4G15530,AT5G43760,AT4G15560,AT5G56630,AT3G04120,AT4G34740,AT1G23730,AT2G46590,AT2G15620,AT5G65860,AT2G17640,AT3G05290,AT2G40000,AT5G17920,AT2G26640,AT2G19860,AT3G45650,AT1G32440,AT3G09710,AT1G03400…
GO:BP	response to salt stress	GO:0009651	0.000118298	620	142	AT1G73660,AT3G08720,AT1G18330,AT2G47900,AT1G53210,AT1G62660,AT5G15650,AT3G49580,AT4G39730,AT2G01570,AT3G04120,AT5G43170,AT1G14920,AT5G17920,AT3G45640,AT1G50460,AT1G49510,AT1G53300,AT1G15690,AT2G39770,AT4G22330,AT3G55730,AT3G19290,AT2G39800,AT1G56650,AT1G16060,AT1G45249,AT4G01070,AT4G32410,AT1G56600,AT5G65010,AT3G17510,AT4G11150,AT4G37260,AT4G35985,AT4G33950,AT3G19580,AT1G77180,AT2G42400,AT5G01820…
GO:BP	reproductive system development	GO:0061458	0.000122103	1256	256	AT1G18390,AT4G36890,AT5G37770,AT5G49160,AT3G15510,AT3G51630,AT3G63010,AT2G23070,AT3G15540,AT1G70070,AT4G36810,AT1G69570,AT2G35620,AT3G55610,AT3G62500,AT2G42200,AT1G63700,AT3G03090,AT2G42280,AT2G23950,AT1G04400,AT3G50070,AT2G17820,AT3G61880,AT3G24770,AT4G03110,AT2G01570,AT3G04120,AT3G08640,AT1G14920,AT4G13345,AT4G20140,AT4G39800,AT3G45640,AT5G49020,AT1G32440,AT4G36930,AT2G18790,AT1G69690,AT3G62420…
GO:BP	oxoacid metabolic process	GO:0043436	0.000131332	1280	260	AT1G80460,AT2G43360,AT2G35690,AT1G73680,AT1G08980,AT4G36830,AT1G62640,AT1G55880,AT1G19440,AT1G19400,AT1G20780,AT3G55610,AT1G43710,AT4G13930,AT1G79700,AT2G02010,AT1G08250,AT4G00570,AT5G05590,AT5G16370,AT4G15530,AT5G43760,AT4G15560,AT5G56630,AT3G04120,AT4G34740,AT2G46590,AT2G15620,AT5G65860,AT2G17640,AT3G05290,AT2G40000,AT5G17920,AT2G26640,AT2G19860,AT3G45650,AT1G32440,AT3G09710,AT1G03400,AT2G18790…
GO:BP	response to ethylene	GO:0009723	0.000135371	315	83	AT5G25350,AT1G18330,AT5G20730,AT1G79700,AT3G50060,AT2G31230,AT2G01570,AT1G14920,AT5G11590,AT4G36900,AT3G55730,AT5G10520,AT5G07580,AT4G16750,AT1G56650,AT2G25490,AT1G64060,AT1G16060,AT4G24670,AT1G22190,AT3G16857,AT1G13260,AT3G24500,AT1G08720,AT4G37260,AT3G51430,AT3G28910,AT3G61630,AT3G56400,AT5G61590,AT3G11100,AT2G41710,AT1G25560,AT2G46310,AT2G35700,AT5G61600,AT5G64900,AT4G24800,AT1G04310,AT5G58550…
GO:BP	polysaccharide metabolic process	GO:0005976	0.000153319	516	122	AT4G36890,AT5G18670,AT2G20370,AT5G65730,AT1G74380,AT1G70090,AT2G35610,AT2G35620,AT1G03310,AT3G03050,AT1G77460,AT1G04430,AT1G06780,AT3G14570,AT5G04885,AT4G18030,AT5G65810,AT5G09870,AT1G29470,AT1G19300,AT1G15690,AT2G39770,AT1G12780,AT5G15740,AT3G23300,AT1G10670,AT4G02130,AT3G21190,AT4G03210,AT4G32410,AT3G10720,AT3G10740,AT2G32540,AT5G64020,AT3G02250,AT4G02280,AT1G26810,AT5G33290,AT5G15470,AT1G77260…
GO:BP	transport	GO:0006810	0.000155002	2809	517	AT4G28860,AT1G80460,AT1G75220,AT1G08960,AT3G10960,AT2G25610,AT4G28880,AT1G72130,AT2G17780,AT3G51670,AT5G54250,AT2G46450,AT1G12840,AT4G09560,AT2G46440,AT2G18860,AT2G46430,AT4G38510,AT2G43330,AT2G25680,AT3G09800,AT1G53210,AT1G70070,AT5G57685,AT1G76340,AT3G18830,AT1G08900,AT1G44100,AT4G22200,AT2G45810,AT5G49830,AT3G46830,AT5G37720,AT5G16300,AT5G10410,AT3G19190,AT4G21180,AT2G02020,AT4G30240,AT3G03960…
GO:BP	reproductive structure development	GO:0048608	0.000158501	1254	255	AT1G18390,AT4G36890,AT5G37770,AT5G49160,AT3G15510,AT3G51630,AT3G63010,AT2G23070,AT3G15540,AT1G70070,AT4G36810,AT1G69570,AT2G35620,AT3G55610,AT2G42200,AT1G63700,AT3G03090,AT2G42280,AT2G23950,AT1G04400,AT3G50070,AT2G17820,AT3G61880,AT3G24770,AT4G03110,AT2G01570,AT3G04120,AT3G08640,AT1G14920,AT4G13345,AT4G20140,AT4G39800,AT3G45640,AT5G49020,AT1G32440,AT4G36930,AT2G18790,AT1G69690,AT3G62420,AT4G36920…
GO:BP	protein modification by small protein conjugation	GO:0032446	0.000169091	859	185	AT5G25350,AT2G30600,AT3G10910,AT1G76390,AT5G38895,AT4G09560,AT5G22920,AT5G18650,AT1G20780,AT1G67340,AT4G02075,AT3G50840,AT4G03190,AT3G18773,AT2G39720,AT5G45360,AT5G59140,AT1G21780,AT1G55000,AT1G45180,AT5G18340,AT3G08660,AT4G27470,AT5G49980,AT3G09770,AT3G06330,AT4G19700,AT4G07400,AT3G55070,AT4G30400,AT4G08980,AT5G64330,AT1G12760,AT1G76410,AT5G01880,AT3G06380,AT5G57740,AT2G01620,AT1G17145,AT1G17970…
GO:BP	regulation of multicellular organismal development	GO:2000026	0.000175619	549	128	AT1G75220,AT1G08970,AT5G37770,AT5G49160,AT3G15510,AT2G23070,AT1G69570,AT1G53230,AT2G42200,AT3G23210,AT3G03090,AT1G04400,AT4G03110,AT2G01570,AT2G46590,AT4G08920,AT1G14920,AT4G12970,AT4G20140,AT5G49020,AT4G36930,AT2G18790,AT3G62420,AT4G36920,AT5G01170,AT5G64360,AT3G19290,AT1G10670,AT4G01500,AT1G17145,AT1G42550,AT1G20823,AT1G07240,AT1G16060,AT2G43410,AT2G24790,AT3G16857,AT4G37295,AT1G13260,AT4G39100…
GO:BP	sulfur compound biosynthetic process	GO:0044272	0.000268315	180	54	AT2G43360,AT1G55880,AT4G15560,AT2G17640,AT5G17920,AT3G45640,AT3G09710,AT1G03400,AT1G62560,AT5G61420,AT5G28030,AT1G10670,AT4G21990,AT1G65860,AT3G13110,AT3G04940,AT1G55920,AT2G25450,AT4G14713,AT1G74100,AT4G39940,AT3G03780,AT4G14680,AT2G36880,AT5G67520,AT3G03630,AT3G17390,AT3G57050,AT5G43450,AT1G36160,AT2G20610,AT1G02880,AT3G02470,AT4G04610,AT1G74090,AT2G14750,AT2G44160,AT5G48850,AT3G59970,AT1G16400…
GO:BP	establishment of localization	GO:0051234	0.000289743	2853	522	AT4G28860,AT1G80460,AT1G75220,AT1G08960,AT3G10960,AT2G25610,AT4G28880,AT1G72130,AT2G17780,AT3G51670,AT5G54250,AT2G46450,AT1G12840,AT5G49880,AT4G09560,AT2G46440,AT2G18860,AT2G46430,AT4G38510,AT2G43330,AT2G25680,AT3G09800,AT1G53210,AT1G70070,AT5G57685,AT1G76340,AT3G18830,AT1G08900,AT1G44100,AT4G22200,AT2G45810,AT5G49830,AT3G46830,AT5G37720,AT5G16300,AT5G10410,AT3G19190,AT4G21180,AT2G02020,AT4G30240…
GO:BP	protein autophosphorylation	GO:0046777	0.000381127	253	69	AT4G28860,AT3G26030,AT4G08850,AT2G35620,AT4G24740,AT5G04870,AT2G41140,AT4G08920,AT4G20140,AT1G65800,AT4G03260,AT5G46330,AT3G29160,AT1G51170,AT5G20480,AT1G61380,AT1G08720,AT3G06483,AT5G24010,AT4G21380,AT4G33950,AT5G25510,AT5G53890,AT1G65790,AT3G46290,AT3G03770,AT3G24550,AT5G25440,AT1G75820,AT1G12970,AT3G56370,AT1G16670,AT3G49670,AT1G08650,AT2G01450,AT2G41820,AT5G23580,AT3G13530,AT4G04695,AT2G26330…
GO:BP	plant organ morphogenesis	GO:1905392	0.000386426	409	100	AT1G74380,AT3G63010,AT3G18830,AT2G35610,AT1G53230,AT2G42200,AT5G20730,AT5G08070,AT1G04400,AT2G47000,AT4G08920,AT4G20140,AT5G09810,AT5G65810,AT1G50460,AT3G13870,AT4G36920,AT5G57740,AT4G16780,AT4G01500,AT4G01540,AT1G69780,AT4G24670,AT3G16857,AT4G31600,AT5G65090,AT2G42490,AT5G16560,AT3G49720,AT4G30980,AT2G34650,AT3G01470,AT4G37180,AT2G20000,AT1G44900,AT3G02150,AT5G67420,AT2G45190,AT5G45420,AT2G01420…
GO:BP	nitrogen compound metabolic process	GO:0006807	0.000433034	9830	1615	AT4G28860,AT5G25350,AT1G80460,AT1G14030,AT1G18390,AT4G13980,AT1G44810,AT5G58900,AT5G11430,AT5G22050,AT1G73660,AT1G16110,AT5G49840,AT4G13990,AT4G28880,AT1G08970,AT5G37770,AT2G35680,AT3G18035,AT2G43360,AT2G30600,AT4G32620,AT1G08980,AT2G20370,AT3G26030,AT4G36830,AT3G08720,AT3G10910,AT5G03220,AT2G30620,AT1G76390,AT3G24050,AT5G49160,AT1G80420,AT1G18330,AT1G15530,AT2G47900,AT5G38895,AT1G55880,AT2G40130…
GO:BP	response to starvation	GO:0042594	0.000620696	189	55	AT5G28770,AT3G49580,AT5G20700,AT4G00550,AT3G52190,AT3G62420,AT1G53310,AT5G61420,AT1G22160,AT1G55920,AT3G06420,AT2G45170,AT4G33030,AT2G44670,AT5G18830,AT4G25350,AT3G47640,AT4G14680,AT1G78020,AT4G24800,AT3G48390,AT3G16690,AT5G20410,AT4G17670,AT3G62980,AT4G15920,AT2G02470,AT3G05630,AT3G03520,AT5G54730,AT3G13450,AT5G63190,AT5G49450,AT5G48850,AT5G20150,AT5G47060,AT5G15330,AT3G18290,AT3G06850,AT5G24660…
GO:BP	cellular polysaccharide metabolic process	GO:0044264	0.000741919	322	82	AT4G36890,AT2G20370,AT5G65730,AT1G74380,AT2G35610,AT2G35620,AT1G03310,AT3G03050,AT1G77460,AT3G14570,AT5G04885,AT5G09870,AT1G19300,AT1G15690,AT2G39770,AT1G12780,AT5G15740,AT1G10670,AT3G21190,AT4G03210,AT4G32410,AT3G10740,AT2G32540,AT5G64020,AT4G02280,AT1G26810,AT5G15470,AT2G44610,AT3G22380,AT3G06550,AT5G49720,AT4G39210,AT4G24010,AT3G02140,AT3G58560,AT3G29810,AT5G06610,AT4G32190,AT5G03650,AT1G23190…
GO:BP	localization	GO:0051179	0.000826696	3079	555	AT4G28860,AT1G80460,AT1G75220,AT1G08960,AT3G10960,AT2G25610,AT4G28880,AT1G72130,AT2G17780,AT3G51670,AT5G54250,AT2G46450,AT1G12840,AT2G47900,AT5G49880,AT4G09560,AT2G46440,AT2G18860,AT2G46430,AT4G38510,AT2G43330,AT2G25680,AT3G09800,AT1G53210,AT1G70070,AT5G57685,AT1G76340,AT3G18830,AT1G08900,AT1G44100,AT4G22200,AT2G45810,AT5G49830,AT3G46830,AT5G37720,AT5G16300,AT5G10410,AT3G19190,AT4G21180,AT2G02020…
GO:BP	oligosaccharide metabolic process	GO:0009311	0.000853168	101	35	AT4G09510,AT3G63010,AT1G62660,AT2G05320,AT4G17770,AT4G39770,AT2G18700,AT1G15690,AT5G64380,AT1G21270,AT2G22190,AT4G33950,AT4G02280,AT5G11720,AT3G06500,AT5G65140,AT3G54440,AT4G24040,AT3G58560,AT4G12430,AT5G20280,AT5G20250,AT1G68020,AT1G60140,AT1G12240,AT5G11110,AT5G17520,AT1G70290,AT1G23870,AT3G57520,AT4G34860,AT5G27320,AT3G03250,AT1G35580,AT1G55740
GO:BP	carboxylic acid metabolic process	GO:0019752	0.00098776	1114	226	AT1G80460,AT2G43360,AT2G35690,AT1G73680,AT1G08980,AT4G36830,AT1G62640,AT1G55880,AT1G19440,AT1G19400,AT1G20780,AT3G55610,AT1G43710,AT4G13930,AT1G79700,AT2G02010,AT1G08250,AT4G00570,AT5G05590,AT5G16370,AT4G15530,AT5G43760,AT4G15560,AT5G56630,AT3G04120,AT4G34740,AT2G46590,AT5G65860,AT2G17640,AT3G05290,AT2G40000,AT5G17920,AT2G26640,AT2G19860,AT1G32440,AT2G18790,AT5G10480,AT1G50460,AT5G42650,AT2G39770…
GO:BP	cellular response to external stimulus	GO:0071496	0.000995542	225	62	AT1G18390,AT5G28770,AT4G03190,AT3G49580,AT3G20660,AT4G00550,AT4G08920,AT3G52190,AT3G62420,AT1G53310,AT5G61420,AT3G25400,AT4G24670,AT1G55920,AT3G06420,AT2G45170,AT4G33030,AT5G18830,AT4G25350,AT5G21170,AT1G80760,AT3G47640,AT4G14680,AT1G64280,AT3G16690,AT5G20410,AT1G79410,AT3G10550,AT2G20610,AT3G62980,AT4G15920,AT5G12200,AT3G08860,AT2G02470,AT3G05630,AT3G03520,AT5G46760,AT3G13450,AT1G05200,AT5G49450…
GO:BP	macromolecule metabolic process	GO:0043170	0.00103103	9179	1511	AT4G28860,AT5G25350,AT1G80460,AT1G14030,AT1G18390,AT4G13980,AT1G44810,AT5G58900,AT5G11430,AT5G22050,AT1G73660,AT1G16110,AT5G49840,AT4G13990,AT4G28880,AT4G36890,AT1G08970,AT2G35680,AT3G18035,AT2G30600,AT5G18670,AT4G32620,AT2G20370,AT3G26030,AT5G65730,AT3G08720,AT3G10910,AT5G03220,AT2G30620,AT1G76390,AT3G24050,AT5G49160,AT1G80420,AT1G18330,AT1G15530,AT1G74380,AT2G47900,AT5G38895,AT2G40130,AT4G38520…
GO:BP	regulation of multicellular organismal process	GO:0051239	0.00105463	599	134	AT1G75220,AT1G08970,AT5G37770,AT5G49160,AT3G15510,AT2G23070,AT1G69570,AT1G53230,AT2G42200,AT3G23210,AT3G03090,AT1G04400,AT4G03110,AT2G01570,AT2G46590,AT4G08920,AT1G14920,AT4G12970,AT4G20140,AT5G65810,AT5G49020,AT4G36930,AT2G18790,AT3G62420,AT4G36920,AT5G01170,AT5G64360,AT3G19290,AT1G10670,AT4G01500,AT1G17145,AT1G42550,AT1G20823,AT1G07240,AT1G16060,AT2G43410,AT2G24790,AT3G16857,AT4G37295,AT1G13260…
GO:BP	small molecule biosynthetic process	GO:0044283	0.00110022	759	163	AT4G34640,AT2G43360,AT1G73680,AT1G08980,AT2G20370,AT4G36830,AT1G62640,AT1G55880,AT1G19440,AT1G60550,AT5G15650,AT3G09820,AT1G20780,AT3G55610,AT4G13930,AT1G79700,AT4G01660,AT1G08250,AT5G05590,AT5G43760,AT4G15560,AT3G04120,AT2G46590,AT2G17640,AT4G20960,AT5G17920,AT4G39800,AT2G26640,AT3G55070,AT5G10480,AT5G42650,AT2G39770,AT1G50480,AT5G64380,AT3G25400,AT5G28030,AT2G19800,AT1G10670,AT2G39800,AT3G29160…
GO:BP	response to external stimulus	GO:0009605	0.00132165	1840	349	AT1G80460,AT1G18390,AT5G37770,AT2G41100,AT5G54250,AT3G10985,AT1G15530,AT2G46450,AT2G47900,AT2G46440,AT5G09990,AT5G23100,AT1G62660,AT5G57685,AT4G08850,AT1G31280,AT5G18650,AT2G25620,AT5G28770,AT5G20730,AT3G19190,AT1G29300,AT4G03190,AT3G49580,AT3G03090,AT5G20700,AT3G56740,AT1G04400,AT1G51090,AT2G47000,AT3G61890,AT5G03210,AT3G20660,AT4G03110,AT4G18040,AT4G00550,AT1G22070,AT3G18165,AT4G08920,AT4G13350…
GO:BP	disaccharide metabolic process	GO:0005984	0.00142895	74	28	AT4G09510,AT1G62660,AT4G17770,AT4G39770,AT2G18700,AT1G15690,AT5G64380,AT2G22190,AT4G33950,AT4G02280,AT5G11720,AT3G06500,AT5G65140,AT3G54440,AT4G24040,AT3G58560,AT4G12430,AT5G20280,AT1G68020,AT1G60140,AT1G12240,AT5G11110,AT5G17520,AT1G70290,AT1G23870,AT4G34860,AT3G03250,AT1G35580
GO:BP	growth	GO:0040007	0.00143312	668	146	AT1G72150,AT2G26710,AT2G20370,AT5G03220,AT1G74380,AT1G12840,AT2G23070,AT5G39990,AT1G67360,AT2G35620,AT1G63700,AT1G77460,AT2G23950,AT1G04400,AT2G47000,AT3G61880,AT4G39730,AT1G80350,AT2G01570,AT4G08920,AT1G14920,AT2G47220,AT5G09810,AT5G65810,AT5G10480,AT3G13870,AT4G30410,AT4G16780,AT4G03260,AT1G29400,AT1G17145,AT1G21270,AT1G16060,AT5G44160,AT3G16857,AT2G30070,AT3G16860,AT5G65090,AT2G20190,AT1G75080…
GO:BP	seedling development	GO:0090351	0.00153283	194	55	AT1G75220,AT1G08970,AT2G23070,AT3G23210,AT3G03090,AT2G01570,AT4G18010,AT2G46590,AT1G14920,AT3G05290,AT5G09810,AT4G36930,AT2G18790,AT1G42550,AT1G07240,AT1G16060,AT2G20180,AT5G53000,AT5G35750,AT3G06500,AT3G47620,AT1G78020,AT1G05010,AT1G66350,AT5G37260,AT4G03560,AT5G61780,AT5G58440,AT4G21540,AT5G66880,AT2G42620,AT5G57390,AT5G56860,AT3G03450,AT5G01540,AT4G39400,AT2G43820,AT2G37678,AT3G54810,AT1G18580…
GO:BP	cell wall organization or biogenesis	GO:0071554	0.00164135	775	165	AT4G36890,AT2G20370,AT5G65730,AT1G74380,AT3G16630,AT1G70090,AT5G15650,AT2G35610,AT2G35620,AT2G35650,AT3G03050,AT1G77460,AT1G04430,AT5G59150,AT1G06780,AT1G08200,AT3G14570,AT5G04885,AT3G01640,AT1G78570,AT4G18030,AT1G80350,AT4G20170,AT4G08920,AT4G20140,AT5G65810,AT5G09870,AT3G13870,AT1G29470,AT1G19300,AT1G15690,AT1G12780,AT5G15740,AT3G23300,AT5G46330,AT1G64760,AT4G02130,AT4G15630,AT3G21190,AT4G03210…
GO:BP	cellular response to light stimulus	GO:0071482	0.00174634	139	43	AT4G28860,AT4G28880,AT1G64860,AT5G20730,AT1G04400,AT2G46590,AT4G08920,AT2G18790,AT4G16780,AT5G13730,AT5G58760,AT2G24790,AT2G20180,AT4G33950,AT2G42400,AT1G02090,AT4G25350,AT1G03600,AT3G59220,AT1G22280,AT2G46340,AT1G18810,AT1G75100,AT2G46370,AT4G18130,AT2G02950,AT5G04190,AT3G13550,AT5G03650,AT4G02440,AT2G42690,AT2G43010,AT2G46970,AT5G35840,AT3G59060,AT1G47870,AT2G37678,AT2G47700,AT1G71230,AT2G42810…
GO:BP	organonitrogen compound metabolic process	GO:1901564	0.00177132	5977	1013	AT4G28860,AT5G25350,AT1G14030,AT1G18390,AT5G11430,AT5G22050,AT1G73660,AT1G16110,AT5G49840,AT4G13990,AT4G28880,AT2G35680,AT2G43360,AT2G30600,AT4G32620,AT1G08980,AT2G20370,AT3G26030,AT4G36830,AT3G08720,AT3G10910,AT1G76390,AT1G15530,AT5G38895,AT1G55880,AT2G40130,AT4G38520,AT4G09560,AT4G19820,AT1G32360,AT5G42750,AT4G26940,AT4G35780,AT1G68400,AT3G51630,AT2G23070,AT1G49620,AT5G40540,AT5G22920,AT1G76360…
GO:BP	cellular response to extracellular stimulus	GO:0031668	0.00181555	219	60	AT1G18390,AT5G28770,AT4G03190,AT3G49580,AT3G20660,AT4G00550,AT4G08920,AT3G52190,AT3G62420,AT1G53310,AT5G61420,AT3G25400,AT4G24670,AT1G55920,AT3G06420,AT2G45170,AT4G33030,AT5G18830,AT4G25350,AT5G21170,AT1G80760,AT3G47640,AT4G14680,AT1G64280,AT3G16690,AT5G20410,AT1G79410,AT3G10550,AT2G20610,AT3G62980,AT4G15920,AT5G12200,AT3G08860,AT2G02470,AT3G05630,AT3G03520,AT5G46760,AT3G13450,AT5G49450,AT5G48850…
GO:BP	cellular response to nutrient levels	GO:0031669	0.00189835	181	52	AT5G28770,AT4G03190,AT3G49580,AT4G00550,AT4G08920,AT3G52190,AT3G62420,AT1G53310,AT5G61420,AT4G24670,AT1G55920,AT3G06420,AT2G45170,AT4G33030,AT5G18830,AT4G25350,AT5G21170,AT1G80760,AT3G47640,AT4G14680,AT1G64280,AT3G16690,AT5G20410,AT3G62980,AT4G15920,AT5G12200,AT3G08860,AT2G02470,AT3G05630,AT3G03520,AT5G46760,AT3G13450,AT5G49450,AT5G48850,AT5G20150,AT5G15330,AT3G18290,AT3G06850,AT5G24660,AT1G09020…
GO:BP	photoperiodism, flowering	GO:0048573	0.00212323	122	39	AT1G18390,AT5G37770,AT3G51630,AT2G23070,AT1G69570,AT2G42280,AT1G04400,AT4G03110,AT2G18790,AT1G51140,AT5G44160,AT4G39100,AT1G21920,AT1G12110,AT1G77180,AT2G42400,AT5G17690,AT1G25560,AT2G46340,AT5G42820,AT1G12910,AT4G30200,AT4G17640,AT3G44110,AT4G02440,AT2G03500,AT5G56860,AT3G24440,AT1G27650,AT1G67580,AT2G47700,AT1G30810,AT3G13670,AT4G40060,AT1G06040,AT4G04920,AT5G63470,AT3G10480,AT4G26150
GO:BP	response to jasmonic acid	GO:0009753	0.00230999	245	65	AT3G15500,AT3G15510,AT2G01570,AT1G14920,AT4G35890,AT4G09460,AT2G18790,AT5G42650,AT2G39770,AT5G53060,AT5G61420,AT3G55730,AT1G56650,AT1G74430,AT3G51480,AT4G19660,AT3G11670,AT1G18150,AT1G74950,AT4G37260,AT3G51430,AT3G28910,AT1G15380,AT1G17420,AT4G14713,AT3G56400,AT4G31550,AT1G74100,AT4G38620,AT2G28900,AT2G46370,AT5G64900,AT1G64280,AT1G49010,AT3G48360,AT3G47600,AT1G66350,AT5G37260,AT1G71030,AT1G71020…
GO:BP	tropism	GO:0009606	0.00240303	127	40	AT2G41100,AT5G23100,AT5G20730,AT1G29300,AT1G04400,AT2G47000,AT4G08920,AT1G53380,AT2G18790,AT5G64330,AT1G05630,AT4G24670,AT5G49665,AT2G20180,AT2G34650,AT1G18810,AT5G50375,AT2G01420,AT2G02950,AT5G04190,AT5G03640,AT1G16510,AT2G01940,AT4G37590,AT3G54220,AT4G16340,AT1G70560,AT1G68130,AT5G45710,AT1G21050,AT5G06140,AT1G70940,AT3G61050,AT5G58960,AT1G77740,AT5G35220,AT5G65683,AT1G25250,AT2G30520,AT1G08190
GO:BP	cysteine biosynthetic process	GO:0019344	0.00249881	28	15	AT1G55880,AT2G17640,AT5G28030,AT4G21990,AT3G13110,AT3G04940,AT1G55920,AT4G39940,AT5G67520,AT3G03630,AT3G57050,AT4G04610,AT2G14750,AT1G62180,AT4G39640
GO:BP	photoperiodism	GO:0009648	0.00268739	132	41	AT1G18390,AT5G37770,AT3G51630,AT2G23070,AT2G37860,AT1G69570,AT2G42280,AT1G04400,AT4G03110,AT3G08640,AT2G18790,AT1G51140,AT5G44160,AT4G39100,AT1G21920,AT1G12110,AT1G77180,AT2G42400,AT5G17690,AT1G25560,AT2G46340,AT5G42820,AT1G12910,AT4G30200,AT4G17640,AT3G44110,AT4G02440,AT2G03500,AT5G56860,AT3G24440,AT1G27650,AT1G67580,AT2G47700,AT1G30810,AT3G13670,AT4G40060,AT1G06040,AT4G04920,AT5G63470,AT3G10480…
GO:BP	negative regulation of seed germination	GO:0010187	0.00272699	22	13	AT2G23070,AT2G01570,AT1G14920,AT4G36930,AT1G16060,AT2G20180,AT5G53000,AT1G66350,AT2G42620,AT5G56860,AT3G03450,AT5G56030,AT4G26150
GO:BP	seed germination	GO:0009845	0.00279128	169	49	AT1G75220,AT1G08970,AT2G23070,AT3G23210,AT3G03090,AT2G01570,AT4G18010,AT2G46590,AT1G14920,AT5G09810,AT4G36930,AT2G18790,AT1G42550,AT1G07240,AT1G16060,AT2G20180,AT5G53000,AT5G35750,AT3G06500,AT3G47620,AT1G05010,AT1G66350,AT5G37260,AT4G03560,AT5G61780,AT4G21540,AT5G66880,AT2G42620,AT5G57390,AT5G56860,AT3G03450,AT5G01540,AT2G43820,AT2G37678,AT3G54810,AT1G18580,AT4G04890,AT4G21750,AT1G27320,AT5G53470…
GO:BP	anatomical structure morphogenesis	GO:0009653	0.00290698	952	195	AT1G72150,AT2G20370,AT5G03220,AT1G74380,AT1G12840,AT3G16630,AT3G15510,AT3G63010,AT5G39990,AT3G18830,AT2G35610,AT1G53230,AT2G35620,AT2G42200,AT5G20730,AT1G63700,AT2G42230,AT1G77460,AT3G03990,AT5G15680,AT5G08070,AT1G04400,AT1G05520,AT2G47000,AT3G14570,AT5G60690,AT3G24770,AT1G80350,AT4G08920,AT4G12970,AT4G20140,AT5G09810,AT5G65810,AT5G42030,AT1G50460,AT3G13870,AT4G36920,AT3G48040,AT5G57740,AT1G19350…
GO:BP	shoot system morphogenesis	GO:0010016	0.00294404	193	54	AT1G53230,AT2G42200,AT1G63700,AT3G03990,AT5G08070,AT1G04400,AT3G24770,AT4G08920,AT4G12970,AT5G65810,AT4G16780,AT4G01500,AT4G01540,AT1G69780,AT4G24670,AT1G80490,AT3G16857,AT3G12280,AT5G57020,AT3G49720,AT5G17690,AT3G01470,AT1G14350,AT3G02150,AT5G67420,AT3G13300,AT1G36160,AT4G18390,AT2G26330,AT3G15030,AT3G14067,AT3G15070,AT5G08520,AT2G01940,AT2G42620,AT1G70560,AT1G68130,AT5G27030,AT1G01510,AT5G07180…
GO:BP	cellular response to environmental stimulus	GO:0104004	0.00298325	227	61	AT4G28860,AT1G18390,AT4G28880,AT2G47900,AT1G53210,AT1G64860,AT5G20730,AT1G04400,AT3G20660,AT2G46590,AT4G08920,AT2G18790,AT1G49510,AT4G16780,AT1G64060,AT5G13730,AT5G58760,AT2G24790,AT2G20180,AT4G33950,AT2G42400,AT1G02090,AT4G25350,AT1G03600,AT2G34620,AT3G59220,AT1G22280,AT2G46340,AT1G18810,AT1G75100,AT2G46370,AT4G18130,AT2G02950,AT1G79410,AT5G04190,AT3G10550,AT3G13550,AT5G03650,AT4G02440,AT2G42690…
GO:BP	cellular response to abiotic stimulus	GO:0071214	0.00298325	227	61	AT4G28860,AT1G18390,AT4G28880,AT2G47900,AT1G53210,AT1G64860,AT5G20730,AT1G04400,AT3G20660,AT2G46590,AT4G08920,AT2G18790,AT1G49510,AT4G16780,AT1G64060,AT5G13730,AT5G58760,AT2G24790,AT2G20180,AT4G33950,AT2G42400,AT1G02090,AT4G25350,AT1G03600,AT2G34620,AT3G59220,AT1G22280,AT2G46340,AT1G18810,AT1G75100,AT2G46370,AT4G18130,AT2G02950,AT1G79410,AT5G04190,AT3G10550,AT3G13550,AT5G03650,AT4G02440,AT2G42690…
GO:BP	response to red or far red light	GO:0009639	0.00309044	242	64	AT4G28860,AT4G28880,AT1G08970,AT3G27690,AT1G29300,AT2G01570,AT2G46590,AT4G08920,AT1G14920,AT1G53380,AT4G36930,AT2G18790,AT5G08130,AT4G16780,AT2G24790,AT2G46260,AT1G14290,AT5G64813,AT2G20180,AT2G42400,AT1G02090,AT4G25350,AT4G39070,AT1G22280,AT2G46340,AT1G18810,AT2G46370,AT4G32250,AT4G18130,AT2G02950,AT5G04190,AT4G18390,AT3G13550,AT5G52250,AT4G19230,AT4G14130,AT4G02440,AT2G43010,AT4G37580,AT2G35940…
GO:BP	organic acid biosynthetic process	GO:0016053	0.00315349	578	128	AT2G43360,AT1G73680,AT1G08980,AT4G36830,AT1G62640,AT1G55880,AT1G19440,AT1G20780,AT3G55610,AT4G13930,AT1G79700,AT1G08250,AT5G05590,AT5G43760,AT2G46590,AT2G17640,AT5G17920,AT2G26640,AT5G10480,AT5G42650,AT2G39770,AT1G50480,AT5G28030,AT2G19800,AT1G10670,AT2G39800,AT3G29160,AT4G21990,AT3G13110,AT1G16060,AT4G24670,AT3G04940,AT1G55920,AT3G11670,AT5G65010,AT4G39120,AT1G74910,AT1G74960,AT3G06470,AT3G25760…
GO:BP	carboxylic acid biosynthetic process	GO:0046394	0.00315349	578	128	AT2G43360,AT1G73680,AT1G08980,AT4G36830,AT1G62640,AT1G55880,AT1G19440,AT1G20780,AT3G55610,AT4G13930,AT1G79700,AT1G08250,AT5G05590,AT5G43760,AT2G46590,AT2G17640,AT5G17920,AT2G26640,AT5G10480,AT5G42650,AT2G39770,AT1G50480,AT5G28030,AT2G19800,AT1G10670,AT2G39800,AT3G29160,AT4G21990,AT3G13110,AT1G16060,AT4G24670,AT3G04940,AT1G55920,AT3G11670,AT5G65010,AT4G39120,AT1G74910,AT1G74960,AT3G06470,AT3G25760…
GO:BP	cellular response to abscisic acid stimulus	GO:0071215	0.00332451	313	78	AT1G18390,AT1G08970,AT4G36830,AT2G23070,AT1G62660,AT3G27690,AT5G53160,AT5G28770,AT2G22430,AT2G17820,AT5G04870,AT3G04110,AT4G18010,AT2G41140,AT3G09770,AT4G35890,AT3G45640,AT1G53300,AT3G48040,AT4G22330,AT3G06380,AT3G19290,AT1G42550,AT1G64060,AT4G17870,AT4G01026,AT1G45249,AT2G38310,AT1G08720,AT2G30020,AT1G15380,AT4G33950,AT3G19580,AT1G65790,AT5G01810,AT2G33540,AT5G35750,AT5G51300,AT3G59220,AT2G01150…
GO:BP	cellular response to alcohol	GO:0097306	0.00332451	313	78	AT1G18390,AT1G08970,AT4G36830,AT2G23070,AT1G62660,AT3G27690,AT5G53160,AT5G28770,AT2G22430,AT2G17820,AT5G04870,AT3G04110,AT4G18010,AT2G41140,AT3G09770,AT4G35890,AT3G45640,AT1G53300,AT3G48040,AT4G22330,AT3G06380,AT3G19290,AT1G42550,AT1G64060,AT4G17870,AT4G01026,AT1G45249,AT2G38310,AT1G08720,AT2G30020,AT1G15380,AT4G33950,AT3G19580,AT1G65790,AT5G01810,AT2G33540,AT5G35750,AT5G51300,AT3G59220,AT2G01150…
GO:BP	positive regulation of biological process	GO:0048518	0.00337192	1507	290	AT1G75220,AT4G13980,AT3G18060,AT1G08970,AT3G18035,AT3G08720,AT2G30620,AT1G80420,AT3G15500,AT1G32360,AT3G15510,AT3G63010,AT3G27690,AT3G25500,AT1G67360,AT5G18650,AT4G14540,AT5G53160,AT3G23210,AT5G20730,AT1G79700,AT1G63700,AT1G01080,AT5G59180,AT3G03960,AT3G03090,AT3G49590,AT4G18880,AT3G50060,AT2G42280,AT5G59140,AT2G22490,AT5G04840,AT1G04400,AT3G20640,AT3G50070,AT2G02080,AT2G22430,AT3G61890,AT4G03110…
GO:BP	ion transport	GO:0006811	0.00370374	1053	212	AT1G80460,AT1G75220,AT1G08960,AT2G25610,AT1G72130,AT2G17780,AT5G54250,AT2G46450,AT1G12840,AT2G46440,AT2G46430,AT4G38510,AT2G25680,AT1G53210,AT5G57685,AT3G18830,AT1G08900,AT1G44100,AT4G22200,AT2G02020,AT4G14500,AT3G03090,AT3G60320,AT4G02050,AT1G51090,AT3G20660,AT5G63530,AT3G04110,AT2G22500,AT4G08920,AT3G05290,AT1G55960,AT3G17630,AT3G52190,AT5G54170,AT1G80510,AT5G22830,AT3G45650,AT3G05220,AT5G48450…
GO:BP	protein modification by small protein conjugation or removal	GO:0070647	0.00417891	940	192	AT5G25350,AT2G30600,AT3G10910,AT1G76390,AT5G38895,AT4G09560,AT5G22920,AT5G18650,AT1G20780,AT1G67340,AT2G24640,AT4G02075,AT3G50840,AT4G33620,AT4G03190,AT3G18773,AT2G39720,AT5G45360,AT5G59140,AT1G21780,AT1G55000,AT1G45180,AT5G18340,AT3G08660,AT4G27470,AT5G49980,AT3G09770,AT3G06330,AT4G19700,AT4G07400,AT3G55070,AT4G30400,AT4G08980,AT5G64330,AT1G12760,AT1G76410,AT5G01880,AT3G06380,AT5G57740,AT2G01620…
GO:BP	reproductive shoot system development	GO:0090567	0.00566765	568	125	AT5G37770,AT5G49160,AT3G15510,AT3G63010,AT3G15540,AT1G69570,AT2G42200,AT1G63700,AT3G03090,AT2G23950,AT1G04400,AT4G03110,AT3G45640,AT5G49020,AT4G36930,AT1G69690,AT4G36920,AT5G64360,AT1G10670,AT4G01500,AT1G20823,AT1G51170,AT2G43410,AT4G24670,AT5G44180,AT2G24790,AT3G26810,AT1G13260,AT4G39100,AT1G55170,AT1G75080,AT1G17420,AT5G37020,AT5G37055,AT3G56400,AT5G16560,AT4G24960,AT1G11870,AT5G35750,AT4G24972…
GO:BP	pectin metabolic process	GO:0045488	0.00658161	193	53	AT4G36890,AT1G70090,AT2G35610,AT1G04430,AT1G06780,AT4G18030,AT5G65810,AT1G29470,AT1G19300,AT1G15690,AT5G15740,AT3G23300,AT4G02130,AT3G21190,AT3G10720,AT3G02250,AT5G33290,AT5G15470,AT1G77260,AT2G33570,AT5G47780,AT3G49720,AT2G43200,AT2G40280,AT4G19120,AT5G64030,AT4G28490,AT4G33220,AT5G64640,AT1G26850,AT3G02350,AT2G26440,AT2G03480,AT3G25140,AT3G58790,AT1G13860,AT2G35100,AT1G05310,AT1G18580,AT3G56080…
GO:BP	response to monosaccharide	GO:0034284	0.00660427	75	27	AT5G28770,AT3G23210,AT5G20700,AT2G19860,AT1G45249,AT1G22160,AT5G01820,AT1G20950,AT1G79550,AT2G28900,AT3G16690,AT4G00238,AT4G17670,AT5G03650,AT4G15900,AT4G15920,AT4G29130,AT1G28330,AT5G49450,AT5G47060,AT5G56860,AT1G61800,AT4G04040,AT3G01090,AT3G47340,AT3G02570,AT1G74670
GO:BP	response to hexose	GO:0009746	0.00680586	71	26	AT5G28770,AT3G23210,AT5G20700,AT2G19860,AT1G45249,AT1G22160,AT5G01820,AT1G20950,AT1G79550,AT2G28900,AT3G16690,AT4G00238,AT4G17670,AT5G03650,AT4G15900,AT4G15920,AT4G29130,AT1G28330,AT5G49450,AT5G47060,AT5G56860,AT1G61800,AT4G04040,AT3G01090,AT3G47340,AT1G74670
GO:BP	regulation of auxin mediated signaling pathway	GO:0010928	0.00744017	44	19	AT3G50060,AT2G47000,AT1G78570,AT2G45000,AT4G37260,AT5G16530,AT2G01420,AT1G69160,AT1G71090,AT5G67300,AT2G43010,AT4G16340,AT3G59060,AT1G75500,AT3G62150,AT1G27340,AT1G70940,AT5G12050,AT1G54200
GO:BP	galacturonan metabolic process	GO:0010393	0.00774432	194	53	AT4G36890,AT1G70090,AT2G35610,AT1G04430,AT1G06780,AT4G18030,AT5G65810,AT1G29470,AT1G19300,AT1G15690,AT5G15740,AT3G23300,AT4G02130,AT3G21190,AT3G10720,AT3G02250,AT5G33290,AT5G15470,AT1G77260,AT2G33570,AT5G47780,AT3G49720,AT2G43200,AT2G40280,AT4G19120,AT5G64030,AT4G28490,AT4G33220,AT5G64640,AT1G26850,AT3G02350,AT2G26440,AT2G03480,AT3G25140,AT3G58790,AT1G13860,AT2G35100,AT1G05310,AT1G18580,AT3G56080…
GO:BP	plant-type cell wall organization	GO:0009664	0.00811883	175	49	AT4G36890,AT2G35610,AT2G35620,AT1G77460,AT1G04430,AT4G18030,AT5G65810,AT1G29470,AT1G15690,AT5G15740,AT3G23300,AT1G64760,AT3G21190,AT3G16860,AT5G15470,AT1G77260,AT2G44610,AT3G29030,AT3G49720,AT2G43200,AT5G63800,AT2G40280,AT4G19120,AT4G16120,AT3G29810,AT5G64030,AT5G06610,AT2G26330,AT1G26850,AT2G22125,AT2G03480,AT3G25140,AT1G13860,AT1G18580,AT3G56080,AT3G61130,AT4G00740,AT4G00750,AT3G55500,AT5G57560…
GO:BP	cellular response to radiation	GO:0071478	0.008679	147	43	AT4G28860,AT4G28880,AT1G64860,AT5G20730,AT1G04400,AT2G46590,AT4G08920,AT2G18790,AT4G16780,AT5G13730,AT5G58760,AT2G24790,AT2G20180,AT4G33950,AT2G42400,AT1G02090,AT4G25350,AT1G03600,AT3G59220,AT1G22280,AT2G46340,AT1G18810,AT1G75100,AT2G46370,AT4G18130,AT2G02950,AT5G04190,AT3G13550,AT5G03650,AT4G02440,AT2G42690,AT2G43010,AT2G46970,AT5G35840,AT3G59060,AT1G47870,AT2G37678,AT2G47700,AT1G71230,AT2G42810…
GO:BP	red or far-red light signaling pathway	GO:0010017	0.00878226	76	27	AT2G46590,AT2G18790,AT4G16780,AT2G24790,AT2G20180,AT2G42400,AT1G02090,AT4G25350,AT1G22280,AT2G46340,AT1G18810,AT2G46370,AT4G18130,AT2G02950,AT5G04190,AT3G13550,AT4G02440,AT2G43010,AT2G46970,AT5G35840,AT3G59060,AT2G37678,AT2G47700,AT1G71230,AT2G42810,AT5G48150,AT1G10470
GO:BP	developmental process involved in reproduction	GO:0003006	0.0089	1507	287	AT1G72150,AT1G18390,AT4G36890,AT5G37770,AT5G49160,AT3G15510,AT3G51630,AT3G63010,AT2G23070,AT3G15540,AT1G70070,AT4G36810,AT1G69570,AT4G08850,AT2G35620,AT4G37450,AT3G55610,AT2G42200,AT1G63700,AT3G03090,AT2G42280,AT2G23950,AT1G04400,AT3G50070,AT2G17820,AT3G61880,AT3G24770,AT3G01640,AT4G03110,AT2G01570,AT3G04120,AT3G08640,AT1G14920,AT4G13345,AT4G20140,AT4G39800,AT3G45640,AT5G49020,AT1G32440,AT4G36930…
GO:BP	response to bacterium	GO:0009617	0.00908419	513	114	AT1G80460,AT1G15530,AT2G46450,AT2G46440,AT1G62660,AT1G31280,AT5G18650,AT3G19190,AT1G51090,AT1G22070,AT3G18165,AT4G08920,AT2G40000,AT4G19700,AT5G18370,AT3G45640,AT4G14465,AT2G39770,AT5G61420,AT4G22330,AT5G10450,AT1G19350,AT5G28040,AT3G50950,AT5G46330,AT4G24670,AT5G04720,AT3G51480,AT4G19660,AT2G01660,AT5G11630,AT5G20480,AT1G61380,AT1G08720,AT5G42950,AT4G11150,AT3G28910,AT1G01580,AT4G21380,AT4G33950…
GO:BP	sulfur amino acid biosynthetic process	GO:0000097	0.00932505	56	22	AT1G55880,AT2G17640,AT5G17920,AT5G28030,AT4G21990,AT3G13110,AT3G04940,AT1G55920,AT4G14713,AT4G39940,AT3G03780,AT5G67520,AT3G03630,AT3G57050,AT4G04610,AT2G14750,AT2G44160,AT3G59970,AT1G62180,AT3G63250,AT3G01120,AT4G39640
GO:BP	response to glucose	GO:0009749	0.00953206	64	24	AT5G28770,AT3G23210,AT5G20700,AT1G45249,AT1G22160,AT5G01820,AT1G20950,AT1G79550,AT2G28900,AT3G16690,AT4G00238,AT4G17670,AT5G03650,AT4G15900,AT4G29130,AT1G28330,AT5G49450,AT5G47060,AT5G56860,AT1G61800,AT4G04040,AT3G01090,AT3G47340,AT1G74670
GO:BP	regulation of carbohydrate metabolic process	GO:0006109	0.0109542	81	28	AT3G55070,AT3G62410,AT1G03400,AT1G15690,AT5G61420,AT1G74910,AT1G76560,AT2G25450,AT3G02140,AT5G43450,AT2G41090,AT5G06610,AT4G27750,AT4G32190,AT1G13900,AT2G01940,AT5G40870,AT3G16000,AT5G48850,AT1G68130,AT1G42430,AT1G71230,AT1G07640,AT4G13830,AT4G04920,AT1G04770,AT3G57420,AT5G63470
GO:BP	anion transport	GO:0006820	0.0113765	402	93	AT1G80460,AT1G72130,AT2G25680,AT5G57685,AT1G44100,AT4G14500,AT3G60320,AT2G22500,AT4G08920,AT3G05290,AT1G55960,AT3G52190,AT5G54170,AT1G80510,AT3G45650,AT3G55740,AT3G13062,AT5G46330,AT1G20823,AT1G78610,AT5G13740,AT2G47160,AT4G31600,AT5G20480,AT4G36640,AT5G49630,AT1G12110,AT2G39890,AT4G33950,AT2G26900,AT1G30400,AT1G68600,AT4G25350,AT2G34690,AT1G69870,AT1G67940,AT1G69850,AT5G24030,AT5G62680,AT3G30390…
GO:BP	response to disaccharide	GO:0034285	0.0115962	77	27	AT5G20700,AT2G22490,AT3G04120,AT3G62410,AT3G29160,AT1G56650,AT1G69780,AT1G22160,AT1G20950,AT2G28900,AT2G39990,AT4G34590,AT1G49010,AT3G16690,AT4G17670,AT5G03650,AT2G24150,AT1G28330,AT3G13450,AT5G47060,AT3G06850,AT5G47390,AT1G61800,AT1G27320,AT3G47340,AT1G74670,AT2G01830
GO:BP	cellular glucan metabolic process	GO:0006073	0.0130522	237	61	AT2G20370,AT5G65730,AT1G74380,AT2G35620,AT1G03310,AT3G03050,AT1G77460,AT3G14570,AT5G04885,AT5G09870,AT1G15690,AT2G39770,AT1G10670,AT4G03210,AT4G32410,AT2G32540,AT4G02280,AT2G44610,AT3G22380,AT3G06550,AT5G49720,AT4G39210,AT4G24010,AT3G02140,AT3G58560,AT3G29810,AT5G06610,AT4G32190,AT5G03650,AT1G23190,AT1G32170,AT4G14130,AT2G01940,AT1G64390,AT5G40870,AT3G16000,AT4G02500,AT2G22125,AT1G68130,AT3G23730…
GO:BP	flower development	GO:0009908	0.0137824	556	121	AT5G37770,AT5G49160,AT3G15510,AT3G63010,AT3G15540,AT1G69570,AT2G42200,AT3G03090,AT2G23950,AT1G04400,AT4G03110,AT3G45640,AT5G49020,AT4G36930,AT1G69690,AT4G36920,AT5G64360,AT1G10670,AT4G01500,AT1G20823,AT1G51170,AT2G43410,AT4G24670,AT5G44180,AT2G24790,AT3G26810,AT1G13260,AT4G39100,AT1G55170,AT1G75080,AT1G17420,AT5G37020,AT5G37055,AT3G56400,AT5G16560,AT4G24960,AT1G11870,AT5G35750,AT4G24972,AT5G17690…
GO:BP	cell wall organization	GO:0071555	0.0151996	607	130	AT4G36890,AT5G65730,AT1G70090,AT5G15650,AT2G35610,AT2G35620,AT2G35650,AT3G03050,AT1G77460,AT1G04430,AT1G06780,AT1G08200,AT3G14570,AT1G78570,AT4G18030,AT4G20170,AT4G20140,AT5G65810,AT5G09870,AT1G29470,AT1G19300,AT1G15690,AT1G12780,AT5G15740,AT3G23300,AT5G46330,AT1G64760,AT4G02130,AT4G15630,AT3G21190,AT4G03210,AT4G32410,AT5G11630,AT3G16860,AT3G10720,AT2G32540,AT3G02250,AT3G42950,AT5G33290,AT5G15470…
GO:BP	cellular response to red or far red light	GO:0071489	0.0152074	78	27	AT2G46590,AT2G18790,AT4G16780,AT2G24790,AT2G20180,AT2G42400,AT1G02090,AT4G25350,AT1G22280,AT2G46340,AT1G18810,AT2G46370,AT4G18130,AT2G02950,AT5G04190,AT3G13550,AT4G02440,AT2G43010,AT2G46970,AT5G35840,AT3G59060,AT2G37678,AT2G47700,AT1G71230,AT2G42810,AT5G48150,AT1G10470
GO:BP	response to absence of light	GO:0009646	0.0161958	46	19	AT5G37770,AT2G41100,AT1G04400,AT4G08920,AT2G43400,AT5G43470,AT4G33950,AT5G18170,AT4G24800,AT3G48390,AT4G15920,AT3G13450,AT5G63190,AT4G24230,AT3G06850,AT2G37678,AT1G58340,AT5G47390,AT3G47340
GO:BP	cellular polysaccharide biosynthetic process	GO:0033692	0.0165049	189	51	AT4G36890,AT2G20370,AT1G74380,AT2G35610,AT2G35620,AT1G03310,AT3G03050,AT1G77460,AT3G14570,AT5G04885,AT5G09870,AT1G19300,AT2G39770,AT1G12780,AT1G10670,AT3G21190,AT4G32410,AT2G32540,AT5G64020,AT1G26810,AT5G15470,AT2G44610,AT3G06550,AT5G49720,AT4G39210,AT4G24010,AT3G02140,AT3G58560,AT3G29810,AT5G06610,AT4G32190,AT5G03650,AT1G23190,AT3G16000,AT4G02500,AT2G22125,AT1G64440,AT3G25140,AT1G11720,AT5G64740…
GO:BP	response to organic cyclic compound	GO:0014070	0.0192154	391	90	AT2G26710,AT2G20370,AT2G40130,AT5G42750,AT4G13930,AT4G18890,AT3G03990,AT3G50060,AT1G04400,AT4G03110,AT1G22070,AT2G01570,AT4G08920,AT1G14920,AT4G35890,AT2G40000,AT4G09460,AT5G61420,AT3G55730,AT5G10450,AT1G19350,AT4G30410,AT5G08130,AT4G30350,AT1G07200,AT1G21270,AT1G74430,AT4G19660,AT1G13260,AT5G43470,AT1G08720,AT4G37260,AT3G51430,AT3G28910,AT1G15380,AT1G75080,AT5G26230,AT3G46290,AT3G56400,AT2G34690…
GO:BP	sulfur amino acid metabolic process	GO:0000096	0.0198116	79	27	AT1G55880,AT2G17640,AT5G17920,AT5G28030,AT5G57740,AT4G21990,AT1G65860,AT3G13110,AT3G04940,AT1G55920,AT4G14713,AT4G39940,AT3G03780,AT5G67520,AT3G03630,AT3G17390,AT3G57050,AT4G04610,AT2G14750,AT2G44160,AT3G59970,AT1G62180,AT3G63250,AT3G01120,AT4G02680,AT3G51770,AT4G39640
GO:BP	transmembrane transport	GO:0055085	0.0198512	1344	257	AT1G80460,AT1G75220,AT1G08960,AT3G10960,AT2G25610,AT1G72130,AT2G17780,AT5G54250,AT2G46450,AT1G12840,AT2G46440,AT2G46430,AT4G38510,AT2G43330,AT1G53210,AT5G57685,AT1G76340,AT3G18830,AT1G08900,AT1G44100,AT4G22200,AT4G21180,AT2G02020,AT3G03090,AT4G02050,AT2G47000,AT3G20660,AT1G47530,AT3G04110,AT2G22500,AT4G08920,AT1G53390,AT3G05290,AT3G17630,AT1G80510,AT3G17650,AT5G22830,AT4G28040,AT3G45650,AT1G73700…
GO:BP	detection of stimulus	GO:0051606	0.019988	92	30	AT4G08920,AT2G18790,AT4G16780,AT5G46330,AT5G20480,AT1G61380,AT2G42400,AT1G02090,AT2G46340,AT1G18810,AT2G46370,AT1G05010,AT4G18130,AT2G02950,AT4G26570,AT5G04190,AT3G13550,AT4G02440,AT2G01940,AT2G43010,AT5G35840,AT3G59060,AT4G39400,AT3G01090,AT2G47700,AT1G71230,AT5G12080,AT4G26090,AT5G48150,AT4G18710
GO:BP	carbohydrate derivative metabolic process	GO:1901135	0.0209843	866	175	AT1G80460,AT4G13990,AT2G20370,AT4G19820,AT4G26940,AT5G15650,AT2G35610,AT3G09820,AT1G03310,AT4G21150,AT1G08280,AT2G05320,AT4G16650,AT5G50420,AT2G36310,AT1G24280,AT3G01640,AT1G55810,AT1G78570,AT4G00550,AT4G15560,AT5G56630,AT3G04120,AT4G34740,AT5G65860,AT1G52630,AT3G21110,AT2G19860,AT2G19880,AT1G32440,AT3G09710,AT1G03400,AT1G50460,AT1G62560,AT2G39770,AT5G61420,AT5G28050,AT5G64380,AT1G12780,AT3G03810…
GO:BP	regulation of hormone levels	GO:0010817	0.0211139	408	93	AT2G26710,AT1G08980,AT3G51670,AT5G42750,AT3G03990,AT2G47000,AT1G78570,AT5G54140,AT2G46590,AT4G08920,AT3G05290,AT1G14130,AT3G63110,AT1G15690,AT5G42650,AT3G19270,AT5G57740,AT4G24670,AT3G25760,AT1G19630,AT5G16530,AT4G39030,AT2G34650,AT1G14350,AT2G36800,AT5G14420,AT2G46370,AT5G11790,AT2G41010,AT3G54430,AT3G29770,AT1G05010,AT2G01420,AT2G20610,AT5G11950,AT4G03560,AT1G69160,AT1G78100,AT5G61780,AT1G22530…
GO:BP	response to sucrose	GO:0009744	0.0211203	75	26	AT5G20700,AT2G22490,AT3G04120,AT3G62410,AT1G56650,AT1G69780,AT1G22160,AT1G20950,AT2G28900,AT2G39990,AT4G34590,AT1G49010,AT3G16690,AT4G17670,AT5G03650,AT2G24150,AT1G28330,AT3G13450,AT5G47060,AT3G06850,AT5G47390,AT1G61800,AT1G27320,AT3G47340,AT1G74670,AT2G01830
GO:BP	rhythmic process	GO:0048511	0.0215781	152	43	AT3G24050,AT1G18330,AT4G13930,AT5G28770,AT3G50000,AT1G04400,AT3G63180,AT4G08920,AT4G26700,AT4G36930,AT5G06980,AT2G18790,AT1G69690,AT4G30350,AT3G14620,AT5G64813,AT1G77180,AT3G22380,AT3G06500,AT1G12910,AT4G30200,AT5G23280,AT3G48360,AT4G17640,AT5G37260,AT4G15920,AT5G67380,AT5G56860,AT4G09970,AT3G06080,AT3G54810,AT1G15950,AT2G31870,AT4G02630,AT2G47700,AT4G36240,AT5G12050,AT3G61070,AT4G04920,AT5G05660…
GO:BP	external encapsulating structure organization	GO:0045229	0.0218303	645	136	AT4G36890,AT5G65730,AT1G70090,AT5G15650,AT2G35610,AT2G35620,AT2G35650,AT3G03050,AT1G77460,AT1G04430,AT1G06780,AT1G08200,AT3G14570,AT1G78570,AT4G18030,AT4G20170,AT4G20140,AT5G65810,AT5G09870,AT1G29470,AT1G19300,AT1G15690,AT1G12780,AT5G15740,AT3G23300,AT5G46330,AT1G64760,AT1G65060,AT4G02130,AT4G15630,AT3G21190,AT4G03210,AT4G32410,AT5G11630,AT3G16860,AT3G10720,AT2G32540,AT3G02250,AT3G42950,AT5G33290…
GO:BP	cellular response to auxin stimulus	GO:0071365	0.0228005	236	60	AT3G51670,AT3G15540,AT2G33310,AT5G20730,AT4G03190,AT3G50060,AT2G47000,AT1G78570,AT5G49980,AT2G45000,AT3G26810,AT4G28640,AT4G37260,AT1G12110,AT5G37020,AT1G76520,AT1G04240,AT5G16530,AT1G31880,AT2G34650,AT4G30080,AT5G60450,AT1G14350,AT2G46370,AT3G54430,AT1G30330,AT3G48360,AT2G01420,AT1G21410,AT3G13300,AT1G69160,AT3G62980,AT1G22530,AT1G71090,AT1G77850,AT1G30690,AT1G16510,AT5G67300,AT4G09160,AT2G43010…
GO:BP	circadian rhythm	GO:0007623	0.0235169	143	41	AT3G24050,AT1G18330,AT4G13930,AT5G28770,AT3G50000,AT1G04400,AT3G63180,AT4G08920,AT4G26700,AT4G36930,AT5G06980,AT2G18790,AT1G69690,AT4G30350,AT3G14620,AT5G64813,AT1G77180,AT3G22380,AT3G06500,AT1G12910,AT4G30200,AT5G23280,AT3G48360,AT4G17640,AT5G37260,AT4G15920,AT5G67380,AT5G56860,AT4G09970,AT3G06080,AT3G54810,AT1G15950,AT4G02630,AT2G47700,AT4G36240,AT5G12050,AT3G61070,AT4G04920,AT5G17300,AT1G10470…
GO:BP	abscisic acid-activated signaling pathway	GO:0009738	0.0257006	283	69	AT1G08970,AT1G62660,AT5G53160,AT2G22430,AT2G17820,AT5G04870,AT3G04110,AT4G18010,AT2G41140,AT3G09770,AT4G35890,AT3G45640,AT1G53300,AT3G48040,AT4G22330,AT3G06380,AT3G19290,AT1G42550,AT1G64060,AT4G17870,AT4G01026,AT1G45249,AT2G38310,AT1G08720,AT2G30020,AT1G15380,AT4G33950,AT3G19580,AT1G65790,AT5G01810,AT2G33540,AT5G51300,AT3G59220,AT2G01150,AT5G14420,AT1G24625,AT3G02140,AT4G17615,AT3G48360,AT1G08650…
GO:BP	photomorphogenesis	GO:0009640	0.0277622	89	29	AT4G28860,AT4G28880,AT1G08970,AT4G08920,AT2G18790,AT2G24790,AT1G14290,AT5G64813,AT2G20180,AT4G39070,AT2G46340,AT2G46370,AT4G32250,AT4G18390,AT3G13550,AT4G02440,AT2G43010,AT4G37580,AT3G55370,AT3G48590,AT2G37678,AT3G54720,AT1G71230,AT5G15160,AT5G48150,AT5G23670,AT1G06040,AT1G74660,AT5G63470
GO:BP	glucan metabolic process	GO:0044042	0.0295043	243	61	AT2G20370,AT5G65730,AT1G74380,AT2G35620,AT1G03310,AT3G03050,AT1G77460,AT3G14570,AT5G04885,AT5G09870,AT1G15690,AT2G39770,AT1G10670,AT4G03210,AT4G32410,AT2G32540,AT4G02280,AT2G44610,AT3G22380,AT3G06550,AT5G49720,AT4G39210,AT4G24010,AT3G02140,AT3G58560,AT3G29810,AT5G06610,AT4G32190,AT5G03650,AT1G23190,AT1G32170,AT4G14130,AT2G01940,AT1G64390,AT5G40870,AT3G16000,AT4G02500,AT2G22125,AT1G68130,AT3G23730…
GO:BP	cellular response to starvation	GO:0009267	0.0305049	154	43	AT5G28770,AT3G49580,AT4G00550,AT3G52190,AT3G62420,AT1G53310,AT5G61420,AT1G55920,AT3G06420,AT2G45170,AT4G33030,AT5G18830,AT4G25350,AT3G47640,AT4G14680,AT3G16690,AT5G20410,AT3G62980,AT4G15920,AT2G02470,AT3G05630,AT3G03520,AT3G13450,AT5G49450,AT5G48850,AT5G20150,AT5G15330,AT3G18290,AT3G06850,AT5G24660,AT1G09020,AT5G60890,AT1G01140,AT1G43910,AT1G27320,AT3G47340,AT3G51770,AT5G17290,AT4G16520,AT3G03250…
GO:BP	anion homeostasis	GO:0055081	0.0315664	44	18	AT3G02040,AT3G09770,AT1G14920,AT5G28030,AT1G42550,AT1G07240,AT1G68670,AT4G24160,AT4G17550,AT1G68570,AT2G41560,AT5G15330,AT1G36370,AT5G34850,AT1G63010,AT4G10040,AT3G17790,AT5G16230
GO:BP	dephosphorylation	GO:0016311	0.0332364	391	89	AT2G35680,AT3G26030,AT1G80420,AT4G38520,AT3G06270,AT5G53140,AT2G25620,AT5G53160,AT5G59160,AT4G17770,AT5G46410,AT4G18010,AT4G39770,AT2G18700,AT3G16560,AT3G55050,AT4G21210,AT5G10480,AT5G64380,AT1G05630,AT5G16480,AT4G17870,AT4G01026,AT2G25070,AT2G38310,AT4G39120,AT1G03590,AT2G29400,AT2G30020,AT2G22190,AT5G65090,AT4G33920,AT5G25510,AT1G71710,AT4G14930,AT5G44020,AT1G01610,AT2G33540,AT5G53000,AT5G35750…
GO:BP	cellular homeostasis	GO:0019725	0.0336867	359	83	AT3G25580,AT3G08710,AT5G54290,AT1G53210,AT5G18600,AT3G02040,AT4G29670,AT5G28770,AT3G23210,AT1G04400,AT5G63530,AT3G04110,AT4G08920,AT2G19860,AT2G18790,AT1G50460,AT1G53300,AT5G39865,AT2G38270,AT5G61440,AT4G21990,AT1G21270,AT3G03860,AT1G45249,AT4G15690,AT2G47160,AT5G58700,AT4G28630,AT4G24120,AT3G58620,AT3G56430,AT5G58690,AT5G24030,AT4G33040,AT4G39080,AT2G47470,AT3G47640,AT4G28730,AT3G05030,AT3G55940…
GO:BP	leaf morphogenesis	GO:0009965	0.0355737	108	33	AT1G53230,AT2G42200,AT5G08070,AT1G04400,AT4G08920,AT5G65810,AT4G01500,AT4G01540,AT1G69780,AT4G24670,AT3G49720,AT3G01470,AT3G02150,AT5G67420,AT3G13300,AT4G18390,AT2G26330,AT3G15030,AT3G15070,AT5G08520,AT2G01940,AT1G70560,AT1G68130,AT1G01510,AT1G27340,AT3G50660,AT5G53400,AT1G17840,AT5G60970,AT4G36380,AT4G18710,AT1G53190,AT1G25250
GO:BP	cell wall biogenesis	GO:0042546	0.0357087	265	65	AT4G36890,AT2G20370,AT5G65730,AT1G74380,AT3G16630,AT5G15650,AT2G35610,AT3G03050,AT1G77460,AT5G59150,AT5G04885,AT3G01640,AT1G80350,AT4G20170,AT4G08920,AT5G65810,AT5G09870,AT3G13870,AT1G19300,AT3G21190,AT4G03210,AT4G32410,AT3G16860,AT4G11150,AT2G32540,AT5G64020,AT5G15470,AT2G33570,AT2G44610,AT4G39990,AT3G49720,AT3G06550,AT1G76670,AT4G16120,AT5G16600,AT2G35700,AT4G24010,AT3G29810,AT1G06400,AT5G06610…
GO:BP	ion transmembrane transport	GO:0034220	0.0358632	708	146	AT1G80460,AT1G75220,AT1G08960,AT2G25610,AT1G72130,AT2G17780,AT5G54250,AT2G46450,AT1G12840,AT2G46440,AT2G46430,AT4G38510,AT1G53210,AT5G57685,AT3G18830,AT1G08900,AT1G44100,AT4G22200,AT2G02020,AT3G03090,AT4G02050,AT3G04110,AT2G22500,AT4G08920,AT3G17630,AT1G80510,AT5G22830,AT1G15690,AT3G55740,AT4G30360,AT5G46330,AT1G20840,AT1G11260,AT1G78610,AT3G51480,AT5G13740,AT2G47160,AT2G30070,AT5G58700,AT2G30080…
GO:BP	regulation of growth	GO:0040008	0.0444543	335	78	AT2G26710,AT5G03220,AT2G23070,AT1G67360,AT1G63700,AT1G77460,AT2G23950,AT1G04400,AT3G61880,AT4G39730,AT2G01570,AT4G08920,AT1G14920,AT2G47220,AT5G65810,AT5G10480,AT4G30410,AT4G03260,AT1G29400,AT1G17145,AT1G16060,AT5G44160,AT3G16857,AT1G75080,AT5G37055,AT5G18830,AT4G25350,AT3G02170,AT3G12280,AT3G57190,AT2G44610,AT5G53000,AT3G49720,AT5G51350,AT1G44900,AT5G11790,AT5G67500,AT5G15580,AT3G49670,AT3G13530…
GO:BP	serine family amino acid biosynthetic process	GO:0009070	0.0469343	53	20	AT1G55880,AT4G13930,AT2G17640,AT5G28030,AT4G21990,AT3G13110,AT3G04940,AT1G55920,AT4G39940,AT5G67520,AT3G03630,AT3G57050,AT1G08630,AT4G04610,AT2G14750,AT1G36370,AT5G26780,AT1G62180,AT5G14060,AT4G39640
GO:BP	hormone transport	GO:0009914	0.0473932	114	34	AT3G51670,AT2G47000,AT1G78570,AT4G08920,AT1G15690,AT5G16530,AT2G34650,AT1G14350,AT5G11790,AT2G01420,AT1G69160,AT1G78100,AT1G22530,AT1G71090,AT4G31820,AT1G30690,AT1G16510,AT4G09160,AT2G01940,AT2G42620,AT1G19770,AT1G70560,AT1G68130,AT1G53700,AT5G19530,AT1G75500,AT2G26170,AT1G54990,AT3G62150,AT1G77690,AT1G70940,AT5G12050,AT1G25250,AT1G54200
GO:BP	root development	GO:0048364	0.0485512	532	114	AT4G09510,AT2G17780,AT1G74380,AT3G18830,AT2G35610,AT5G20730,AT3G50060,AT2G02080,AT3G08800,AT2G47000,AT2G11890,AT4G08920,AT4G20140,AT5G09810,AT5G42030,AT1G50460,AT3G13870,AT5G01170,AT5G57740,AT4G16780,AT2G39800,AT4G30340,AT2G39830,AT1G05630,AT1G69780,AT5G44160,AT4G24670,AT1G01950,AT5G11630,AT3G16857,AT4G37295,AT1G13260,AT4G31600,AT5G49665,AT5G65090,AT3G29030,AT2G42490,AT1G31880,AT5G63770,AT4G30980…
GO:BP	response to auxin	GO:0009733	0.0492866	433	96	AT5G37770,AT3G51670,AT3G15540,AT1G53230,AT2G33310,AT5G20730,AT4G03190,AT3G50060,AT2G47000,AT1G78570,AT5G49980,AT5G09810,AT3G21110,AT3G63110,AT2G45000,AT3G55730,AT5G57740,AT4G16780,AT1G56650,AT3G26810,AT4G28640,AT4G37260,AT1G12110,AT3G28910,AT5G37020,AT1G76520,AT1G04240,AT5G16530,AT4G16890,AT1G31880,AT2G34650,AT4G30080,AT5G60450,AT2G20000,AT1G14350,AT2G46370,AT3G54430,AT1G30330,AT1G49010,AT3G48360…
GO:BP	gravitropism	GO:0009630	0.0497405	96	30	AT5G20730,AT1G29300,AT2G47000,AT1G53380,AT2G18790,AT1G05630,AT4G24670,AT5G49665,AT2G20180,AT2G34650,AT5G50375,AT2G01420,AT2G02950,AT1G16510,AT2G01940,AT4G37590,AT3G54220,AT4G16340,AT1G70560,AT1G68130,AT5G45710,AT5G06140,AT1G70940,AT3G61050,AT5G58960,AT1G77740,AT5G35220,AT5G65683,AT1G25250,AT1G08190
KEGG	Amino sugar and nucleotide sugar metabolism	KEGG:00520	1.49e-06	131	40	AT4G19820,AT5G15650,AT1G06780,AT1G08200,AT3G01640,AT1G78570,AT2G19860,AT1G50460,AT2G39770,AT1G12780,AT1G74910,AT3G53520,AT3G10740,AT4G33030,AT5G47780,AT4G39210,AT1G53500,AT5G52560,AT5G18070,AT1G23190,AT1G65590,AT2G45310,AT4G29130,AT3G51160,AT3G47540,AT3G02350,AT1G64440,AT3G25140,AT1G18580,AT3G61130,AT2G38650,AT3G23820,AT1G63000,AT4G10960,AT3G02570,AT3G14790,AT3G03250,AT3G29360,AT1G63180,AT5G64570
KEGG	Sulfur metabolism	KEGG:00920	3.78e-05	42	18	AT1G55880,AT2G17640,AT5G28030,AT4G21990,AT3G13110,AT3G04940,AT1G55920,AT4G39940,AT4G14680,AT1G53580,AT5G67520,AT4G04610,AT2G14750,AT5G63980,AT5G63990,AT1G62180,AT3G01120,AT5G04590
KEGG	Galactose metabolism	KEGG:00052	9.42e-05	57	21	AT1G62660,AT5G56630,AT2G19860,AT1G50460,AT1G12780,AT1G56600,AT5G11720,AT3G54440,AT5G52560,AT1G23190,AT5G20250,AT4G29130,AT1G12240,AT1G64440,AT3G57520,AT4G10960,AT3G03250,AT1G63180,AT4G32840,AT3G52840,AT1G55740
KEGG	Plant hormone signal transduction	KEGG:04075	0.000140224	273	61	AT5G25350,AT5G42750,AT3G63010,AT3G15540,AT5G53160,AT2G33310,AT5G20730,AT3G50070,AT1G22070,AT2G01570,AT1G14920,AT1G19350,AT3G19290,AT2G25490,AT4G17870,AT4G01026,AT1G45249,AT4G19660,AT3G16857,AT2G38310,AT1G74950,AT4G28640,AT5G39340,AT1G75080,AT4G33950,AT1G04240,AT5G35750,AT2G46370,AT1G64280,AT1G04310,AT1G66350,AT1G01360,AT3G62980,AT5G13370,AT1G16510,AT5G66880,AT1G70700,AT2G43010,AT4G31920,AT5G46790…
KEGG	Plant-pathogen interaction	KEGG:04626	0.00212155	194	44	AT1G80460,AT5G37770,AT2G41100,AT2G46450,AT2G46440,AT2G46430,AT1G19440,AT1G73630,AT2G47060,AT5G04870,AT5G43760,AT2G26640,AT3G45640,AT4G30360,AT5G46330,AT5G45260,AT1G64060,AT5G20480,AT3G28910,AT5G15410,AT1G04220,AT2G15680,AT2G43290,AT2G04880,AT2G41090,AT5G23580,AT2G27480,AT4G04695,AT2G30250,AT5G56270,AT3G25070,AT1G12220,AT2G28630,AT4G30560,AT1G01120,AT3G57530,AT1G35670,AT5G04530,AT4G26090,AT5G56030…
KEGG	Starch and sucrose metabolism	KEGG:00500	0.00213728	165	39	AT1G62660,AT1G03310,AT1G66250,AT4G17770,AT5G58090,AT5G04885,AT4G39770,AT2G18700,AT2G19860,AT1G50460,AT2G01630,AT2G22190,AT4G02280,AT5G11720,AT5G65140,AT5G49720,AT4G39210,AT4G24040,AT4G12430,AT5G03650,AT1G23190,AT5G20280,AT1G68020,AT4G29130,AT1G60140,AT1G64390,AT1G12240,AT5G11110,AT1G11720,AT4G27830,AT4G27820,AT1G60260,AT5G36890,AT1G70290,AT1G23870,AT1G76130,AT1G61810,AT1G32900,AT3G03250
KEGG	Purine metabolism	KEGG:00230	0.00276559	100	27	AT3G09820,AT4G34740,AT3G21110,AT1G32440,AT2G38280,AT3G04080,AT5G18280,AT5G03300,AT4G14930,AT3G17470,AT4G39940,AT3G27060,AT4G14680,AT5G67520,AT3G23580,AT2G02970,AT1G72880,AT1G23190,AT5G35170,AT2G14750,AT4G18440,AT1G54130,AT3G49160,AT2G36580,AT3G52990,AT4G22570,AT4G04955
KEGG	Phosphatidylinositol signaling system	KEGG:04070	0.0123054	76	21	AT2G18730,AT4G30340,AT5G58700,AT4G39120,AT2G45150,AT5G58690,AT5G63770,AT1G21980,AT3G55940,AT2G41090,AT3G10550,AT1G68000,AT5G16760,AT5G63980,AT5G63990,AT1G34260,AT4G08170,AT5G07920,AT1G60890,AT1G77740,AT1G10900
KEGG	Glycerolipid metabolism	KEGG:00561	0.0136319	61	18	AT1G80460,AT1G18360,AT3G17770,AT5G04040,AT1G80380,AT4G00550,AT2G18730,AT4G30340,AT3G11670,AT4G33030,AT1G01610,AT5G63770,AT5G20410,AT4G34240,AT3G03520,AT5G07920,AT4G36250,AT1G73480
KEGG	Cysteine and methionine metabolism	KEGG:00270	0.0146324	121	29	AT5G49160,AT1G55880,AT2G17640,AT5G17920,AT5G28030,AT1G69770,AT3G13110,AT3G04940,AT1G55920,AT4G19020,AT2G38400,AT3G03780,AT2G36880,AT3G49680,AT3G03630,AT3G17390,AT1G05010,AT3G57050,AT3G02470,AT3G15020,AT5G36160,AT3G08860,AT5G18930,AT3G63250,AT3G01120,AT3G23810,AT3G05430,AT5G14060,AT4G39660
KEGG	Inositol phosphate metabolism	KEGG:00562	0.0149642	77	21	AT4G39800,AT2G19800,AT5G58700,AT4G39120,AT5G58690,AT1G21980,AT3G55940,AT1G17340,AT3G10550,AT5G20840,AT1G68000,AT5G16760,AT4G26260,AT5G63980,AT5G63990,AT1G22620,AT1G34260,AT4G08170,AT1G60890,AT1G77740,AT1G10900
