# Supplementary material for: An auxin-mediated ultradian rhythm promotes root regeneration in Arabidopsis
Source: Research Square preprint supplement (doi:10.21203/rs.3.rs-604908/v1), 2021-06-25
Supplement: Supplementary file 6 [file 1f4a92796ba4905b1362559b.xlsx]

## Sheet: Supplementary Table 4
Supplementary Table 4. Clustering results of differentially expressed genes between the petiole regions of wild-type and eur1-11 leaves after excision.
GeneID	No of cluster	Symbol	Locus
AT1G53541	0	AT1G53541	locus:4515102673
AT2G28710	0	AT2G28710	locus:2054548
AT3G18400	0	NAC058	locus:2095007
AT5G24240	0	AT5G24240	locus:2169774
AT4G01430	0	UMAMIT29	locus:2125167
AT1G64370	0	AT1G64370	locus:2014195
AT1G73010	0	PS2	locus:2032748
AT4G27450	0	AT4G27450	locus:2123994
AT1G68850	0	AT1G68850	locus:2012428
AT3G21710	0	AT3G21710	locus:2093039
AT3G23190	0	AT3G23190	locus:2086248
AT3G32980	0	AT3G32980	locus:2097273
AT3G43190	0	SUS4	locus:2084756
AT5G39190	0	GER2	locus:2157230
AT2G03200	0	AT2G03200	locus:2056916
AT2G36120	0	DOT1	locus:2053524
AT2G43150	0	AT2G43150	locus:2041061
AT3G42052	0	AT3G42052	locus:504955815
AT4G38340	0	AT4G38340	locus:2121738
AT5G22500	0	FAR1	locus:2171107
ATMG00030	0	ORF107A	locus:504954741
AT2G01270	0	QSOX2	locus:2038771
AT2G38870	0	AT2G38870	locus:2064981
AT3G41979	0	AT3G41979	locus:1005716579
AT4G36820	0	AT4G36820	locus:2115205
AT3G29035	0	NAC3	locus:2087037
AT1G07050	0	AT1G07050	locus:2007482
AT1G29860	0	WRKY71	locus:2019382
AT2G38380	0	AT2G38380	locus:2057180
AT4G28890	0	AT4G28890	locus:2123558
AT1G18970	0	GLP4	locus:2011291
AT1G33900	0	AT1G33900	locus:2203797
AT1G34670	0	MYB93	locus:2023951
AT1G44010	0	AT1G44010	locus:2037164
AT2G23540	0	AT2G23540	locus:2046743
AT2G30210	0	LAC3	locus:2060879
AT2G33480	0	NAC041	locus:2051053
AT2G43870	0	AT2G43870	locus:2043924
AT2G48130	0	AT2G48130	locus:2039366
AT4G32950	0	AT4G32950	locus:2123792
AT4G33720	0	AT4G33720	locus:2134178
AT5G05390	0	LAC12	locus:2153469
AT5G06090	0	GPAT7	locus:2152825
AT5G09530	0	PELPK1	locus:2144716
AT5G10580	0	AT5G10580	locus:2142549
AT5G22555	0	AT5G22555	locus:505006629
AT5G23190	0	CYP86B1	locus:2166786
AT5G41040	0	RWP1	locus:2162976
AT5G49770	0	AT5G49770	locus:2156992
AT5G58860	0	CYP86A1	locus:2154558
AT1G12805	0	AT1G12805	locus:1006230680
AT1G13970	0	AT1G13970	locus:2014819
AT1G18140	0	LAC1	locus:2194110
AT1G18980	0	AT1G18980	locus:2011306
AT1G21310	0	EXT3	locus:2014947
AT1G23720	0	AT1G23720	locus:2034898
AT1G26240	0	AT1G26240	locus:2028741
AT1G26250	0	AT1G26250	locus:2028731
AT1G35830	0	AT1G35830	locus:2007641
AT1G55940	0	CYP708A1	locus:2012055
AT1G56320	0	AT1G56320	locus:2011811
AT1G63410	0	AT1G63410	locus:2031285
AT1G68880	0	bZIP	locus:2012413
AT1G71692	0	AGL12	locus:2824536
AT1G76930	0	EXT4	locus:2025262
AT1G77150	0	AT1G77150	locus:2195940
AT1G80390	0	IAA15	locus:2034200
AT2G01510	0	AT2G01510	locus:2049562
AT2G02840	0	AT2G02840	locus:2056680
AT2G05440	0	GRP9	locus:2058959
AT2G18360	0	AT2G18360	locus:2062126
AT2G18370	0	AT2G18370	locus:2062116
AT2G29130	0	LAC2	locus:2066117
AT2G32270	0	ZIP3	locus:2062576
AT2G35380	0	AT2G35380	locus:2062420
AT3G03530	0	NPC4	locus:2099639
AT3G04570	0	AHL19	locus:2084958
AT3G05690	0	NF-YA2	locus:2078072
AT3G07970	0	QRT2	locus:2077407
AT3G20900	0	AT3G20900	locus:2088776
AT3G22800	0	AT3G22800	locus:2094389
AT3G27950	0	AT3G27950	locus:2086829
AT3G28550	0	AT3G28550	locus:2095462
AT3G42180	0	AT3G42180	locus:2100814
AT3G44540	0	FAR4	locus:2076028
AT3G57765	0	U2.3	locus:1005716599
AT4G04105	0	AT4G04105	locus:504955318
AT4G15390	0	AT4G15390	locus:2130065
AT4G15393	0	CYP702A5	locus:504955449
AT4G15396	0	CYP702A6	locus:504955443
AT4G17220	0	MAP70-5	locus:2130734
AT4G24140	0	AT4G24140	locus:2134976
AT4G30140	0	CDEF1	locus:2126520
AT4G36610	0	AT4G36610	locus:2115435
AT4G38080	0	AT4G38080	locus:2121031
AT4G39260	0	CCR1	locus:2136298
AT4G39675	0	AT4G39675	locus:505006570
AT5G04120	0	AT5G04120	locus:2146678
AT5G07475	0	AT5G07475	locus:504956334
AT5G09480	0	AT5G09480	locus:2184842
AT5G10210	0	AT5G10210	locus:2184093
AT5G13580	0	ABCG6	locus:2173184
AT5G24220	0	AT5G24220	locus:2169754
AT5G26310	0	UGT72E3	locus:2151059
AT5G37690	0	AT5G37690	locus:2151744
AT5G40395	0	U6acat	locus:1005716828
AT5G44550	0	AT5G44550	locus:2163386
AT5G49850	0	AT5G49850	locus:2155451
AT5G53902	0	U3B	locus:1005716107
AT5G58780	0	cPT5	locus:2178838
AT5G60100	0	PRR3	locus:2164160
AT5G63560	0	FACT	locus:2160549
AT5G65980	0	AT5G65980	locus:2156847
AT5G66985	0	AT5G66985	locus:505006720
AT1G26400	0	AT1G26400	locus:2197920
AT1G35250	0	AT1G35250	locus:2206727
AT1G54540	0	AT1G54540	locus:2020163
AT1G58130	0	AT1G58130	locus:2196235
AT1G62280	0	SLAH1	locus:2018027
AT1G74460	0	AT1G74460	locus:2019155
AT2G01020	0	AT2G01020	locus:1005716653
AT2G27535	0	AT2G27535	locus:504956071
AT2G28755	0	AT2G28755	locus:2827733
AT2G29250	0	AT2G29250	locus:2043127
AT2G36090	0	AT2G36090	locus:2053509
AT2G44240	0	AT2G44240	locus:2050579
AT3G02940	0	MYB107	locus:2075387
AT3G26200	0	CYP71B22	locus:2093521
AT3G26770	0	AT3G26770	locus:2088399
AT3G43826	0	AT3G43826	locus:1006230266
AT3G50300	0	AT3G50300	locus:2074820
AT4G03376	0	AT4G03376	locus:5019474803
AT4G14465	0	AHL20	locus:505006460
AT4G17215	0	AT4G17215	locus:505006487
AT4G27810	0	AT4G27810	locus:2137350
AT5G16770	0	MYB9	locus:2149000
AT5G19410	0	ABCG23	locus:2150290
AT5G20860	0	AT5G20860	locus:2147097
AT5G39120	0	AT5G39120	locus:2177157
AT5G39130	0	AT5G39130	locus:2177167
AT5G39160	0	AT5G39160	locus:2157200
AT5G39180	0	AT5G39180	locus:2157220
AT5G53660	0	GRF7	locus:2168676
AT5G59530	0	AT5G59530	locus:2148403
AT1G01080	1	AT1G01080	locus:2200975
AT1G01130	1	AT1G01130	locus:2035357
AT1G01430	1	TBL25	locus:2035342
AT1G02270	1	AT1G02270	locus:2204863
AT1G02610	1	AT1G02610	locus:2196085
AT1G03630	1	POR C	locus:2020738
AT1G05670	1	AT1G05670	locus:2031973
AT1G06690	1	AT1G06690	locus:2009120
AT1G08650	1	PPCK1	locus:2025520
AT1G10560	1	PUB18	locus:2194564
AT1G12460	1	AT1G12460	locus:2034725
AT1G12800	1	AT1G12800	locus:2010336
AT1G15260	1	AT1G15260	locus:2037763
AT1G16080	1	AT1G16080	locus:2200517
AT1G17650	1	GLYR2	locus:2007923
AT1G18330	1	EPR1	locus:2014114
AT1G18460	1	AT1G18460	locus:2014159
AT1G20470	1	AT1G20470	locus:2034351
AT1G21945	1	AT1G21945	locus:2826718
AT1G23200	1	AT1G23200	locus:2201230
AT1G24170	1	LGT9	locus:2032357
AT1G26230	1	Cpn60beta4	locus:2028751
AT1G29450	1	AT1G29450	locus:2013608
AT1G31800	1	CYP97A3	locus:2034476
AT1G42980	1	AT1G42980	locus:2009869
AT1G43560	1	ty2	locus:2194661
AT1G44446	1	CH1	locus:2823671
AT1G45545	1	AT1G45545	locus:2825751
AT1G48350	1	EMB3105	locus:2007690
AT1G49840	1	AT1G49840	locus:2007268
AT1G50460	1	HKL1	locus:2008031
AT1G52240	1	ROPGEF11	locus:2018169
AT1G55490	1	CPN60B	locus:2193839
AT1G58520	1	RXW8	locus:504956093
AT1G60000	1	AT1G60000	locus:2202740
AT1G61260	1	AT1G61260	locus:2008445
AT1G62290	1	AT1G62290	locus:2018037
AT1G64980	1	CDI	locus:2010776
AT1G67530	1	AT1G67530	locus:2008813
AT1G68890	1	PHYLLO	locus:2205450
AT1G70740	1	AT1G70740	locus:2033577
AT1G72130	1	AT1G72130	locus:2030316
AT1G72150	1	PATL1	locus:2207001
AT1G73090	1	AT1G73090	locus:2032743
AT1G77090	1	AT1G77090	locus:2025292
AT1G80610	1	AT1G80610	locus:2198933
AT2G02430	1	AT2G02430	locus:2056236
AT2G05620	1	PGR5	locus:2058974
AT2G13550	1	AT2G13550	locus:2054147
AT2G20670	1	AT2G20670	locus:2046006
AT2G21210	1	AT2G21210	locus:2047007
AT2G24060	1	AT2G24060	locus:2061380
AT2G24395	1	AT2G24395	locus:504955942
AT2G26190	1	AT2G26190	locus:2057765
AT2G31810	1	AT2G31810	locus:2045248
AT2G32390	1	GLR3.5	locus:2062601
AT2G33180	1	AT2G33180	locus:2046510
AT2G34460	1	AT2G34460	locus:2040854
AT2G34770	1	FAH1	locus:2061564
AT2G34860	1	EDA3	locus:2044812
AT2G35410	1	AT2G35410	locus:2062379
AT2G35880	1	AT2G35880	locus:2039235
AT2G37220	1	AT2G37220	locus:2049721
AT2G38140	1	PSRP4	locus:2042882
AT2G39980	1	AT2G39980	locus:2061191
AT2G40490	1	HEME2	locus:2061903
AT2G42200	1	SPL9	locus:2059974
AT2G43750	1	OASB	locus:2043964
AT2G46720	1	KCS13	locus:2062775
AT3G01060	1	AT3G01060	locus:2102162
AT3G02010	1	AT3G02010	locus:2078653
AT3G02380	1	COL2	locus:2074587
AT3G02450	1	AT3G02450	locus:2076929
AT3G03780	1	MS2	locus:2079434
AT3G04140	1	AT3G04140	locus:2103060
AT3G04790	1	EMB3119	locus:2084898
AT3G06980	1	AT3G06980	locus:2077592
AT3G07360	1	PUB9	locus:2079706
AT3G08740	1	AT3G08740	locus:2077888
AT3G09920	1	PIP5K9	locus:2085074
AT3G10300	1	AT3G10300	locus:2076229
AT3G12780	1	PGK1	locus:2087750
AT3G25480	1	AT3G25480	locus:2094488
AT3G26700	1	AT3G26700	locus:2090797
AT3G26710	1	CCB1	locus:2090807
AT3G27850	1	RPL12-C	locus:2086450
AT3G28040	1	AT3G28040	locus:2091353
AT3G28910	1	MYB30	locus:2090764
AT3G29020	1	MYB110	locus:2087017
AT3G44450	1	AT3G44450	locus:2100167
AT3G44890	1	RPL9	locus:2082127
AT3G44990	1	XTH31	locus:2075919
AT3G47820	1	PUB39	locus:2100372
AT3G48730	1	GSA2	locus:2114520
AT3G49680	1	BCAT3	locus:2097320
AT3G50950	1	ZAR1	locus:2078012
AT3G51470	1	AT3G51470	locus:2081785
AT3G52150	1	PSRP2	locus:2083810
AT3G52380	1	CP33	locus:2079874
AT3G52740	1	AT3G52740	locus:2083243
AT3G52960	1	AT3G52960	locus:2085181
AT3G60750	1	AT3G60750	locus:2101871
AT3G62630	1	AT3G62630	locus:2081610
AT3G63190	1	RRF	locus:2077254
AT4G01026	1	PYL7	locus:505006424
AT4G01090	1	AT4G01090	locus:2125058
AT4G03060	1	AOP2	locus:2139380
AT4G10300	1	AT4G10300	locus:2122734
AT4G16155	1	AT4G16155	locus:505006477
AT4G18480	1	CHLI1	locus:2005500
AT4G19380	1	AT4G19380	locus:2140401
AT4G19985	1	AT4G19985	locus:505006501
AT4G22750	1	AT4G22750	locus:2132654
AT4G25260	1	AT4G25260	locus:2122624
AT4G25420	1	GA20OX1	locus:2005511
AT4G27710	1	CYP709B3	locus:2137697
AT4G30440	1	GAE1	locus:2118711
AT4G30950	1	FAD6	locus:2126734
AT4G32300	1	SD2-5	locus:2116525
AT4G34090	1	AT4G34090	locus:2124226
AT4G34620	1	SSR16	locus:2139624
AT4G36500	1	AT4G36500	locus:2115380
AT4G36730	1	GBF1	locus:2115250
AT4G37800	1	XTH7	locus:2137609
AT4G38160	1	pde191	locus:2120998
AT4G38860	1	AT4G38860	locus:2141786
AT4G39890	1	RABH1c	locus:2140045
AT5G01100	1	FRB1	locus:2150129
AT5G03040	1	iqd2	locus:2143503
AT5G06700	1	AT5G06700	locus:2170184
AT5G11450	1	PPD5	locus:2144236
AT5G11590	1	TINY2	locus:2144296
AT5G13990	1	EXO70C2	locus:2159058
AT5G15310	1	MYB16	locus:2150891
AT5G15410	1	DND1	locus:2180867
AT5G15530	1	BCCP2	locus:2180927
AT5G21920	1	YLMG2	locus:504956451
AT5G22340	1	AT5G22340	locus:2176312
AT5G26230	1	MAKR1	locus:2179719
AT5G26742	1	emb1138	locus:504955106
AT5G28750	1	AT5G28750	locus:2184241
AT5G30510	1	RPS1	locus:2145860
AT5G35100	1	AT5G35100	locus:2150371
AT5G35220	1	EGY1	locus:2182372
AT5G39080	1	AT5G39080	locus:2177197
AT5G40390	1	SIP1	locus:2170528
AT5G40450	1	AT5G40450	locus:2170588
AT5G40950	1	RPL27	locus:2162971
AT5G43630	1	TZP	locus:2158372
AT5G44190	1	GLK2	locus:2167639
AT5G44520	1	AT5G44520	locus:2163436
AT5G48220	1	AT5G48220	locus:2164768
AT5G49030	1	OVA2	locus:2154349
AT5G52882	1	AT5G52882	locus:4010714050
AT5G53580	1	PLR1	locus:2168601
AT5G54630	1	AT5G54630	locus:2172109
AT5G57010	1	AT5G57010	locus:2164655
AT5G57030	1	LUT2	locus:2164590
AT5G57660	1	COL5	locus:2172545
AT5G58090	1	AT5G58090	locus:2155841
AT5G58250	1	EMB3143	locus:2161218
AT5G58430	1	EXO70B1	locus:2171208
AT5G60310	1	AT5G60310	locus:2144055
AT5G63310	1	NDPK2	locus:2161922
AT5G63780	1	SHA1	locus:2160619
AT5G64940	1	ATH13	locus:2177719
AT5G66580	1	AT5G66580	locus:2154955
AT5G67390	1	AT5G67390	locus:2158217
AT5G67640	1	AT5G67640	locus:2158661
ATCG00010	1	TRNH	locus:504954625
ATCG00090	1	TRNS.1	locus:504954633
ATCG00250	1	TRNE	locus:504954649
ATCG00580	1	PSBE	locus:504954681
ATCG00690	1	PSBT	locus:504954692
ATCG00890	1	NDHB.1	locus:504954712
ATCG00905	1	RPS12C	locus:504954489
ATCG01000	1	YCF1.1	locus:504954723
ATCG01100	1	NDHA	locus:504954733
ATCG01110	1	NDHH	locus:504954734
ATCG01250	1	NDHB.2	locus:504954477
ATCG01280	1	YCF2.2	locus:504954480
AT2G30600	1	AT2G30600	locus:2064362
AT3G02570	1	MEE31	locus:2076864
AT3G53460	1	CP29	locus:2084061
ATCG00050	1	RPS16	locus:504954629
AT1G15960	1	NRAMP6	locus:2200437
AT1G30840	1	PUP4	locus:2196989
AT1G69830	1	AMY3	locus:2196759
AT1G80920	1	J8	locus:2025792
AT3G15353	1	MT3	locus:505006351
AT3G61210	1	AT3G61210	locus:2098841
AT4G00780	1	AT4G00780	locus:2134563
AT4G08290	1	UMAMIT20	locus:2132447
AT4G39770	1	TPPH	locus:2135272
ATCG01040	1	YCF5	locus:504954727
AT1G12500	1	AT1G12500	locus:2034730
AT1G23310	1	GGT1	locus:2028000
AT2G32870	1	AT2G32870	locus:2059364
AT2G33570	1	GALS1	locus:2050982
AT2G36630	1	AT2G36630	locus:2040605
AT3G62930	1	AT3G62930	locus:2099157
AT4G11000	1	AT4G11000	locus:2123406
AT4G14210	1	PDS3	locus:2129515
AT5G22920	1	AT5G22920	locus:2172656
AT5G28770	1	BZO2H3	locus:2184251
AT5G52060	1	BAG1	locus:2173108
AT1G04240	1	SHY2	locus:2018379
AT1G05850	1	POM1	locus:2198688
AT1G10682	1	AT1G10682	locus:4515102515
AT1G11530	1	CXXS1	locus:2200141
AT1G12080	1	AT1G12080	locus:2202018
AT1G17140	1	ICR1	locus:2020342
AT1G18400	1	BEE1	locus:2014144
AT1G29510	1	SAUR68	locus:2013703
AT1G66940	1	AT1G66940	locus:2204470
AT1G67860	1	AT1G67860	locus:2200221
AT1G67865	1	AT1G67865	locus:505006206
AT1G76080	1	CDSP32	locus:2199803
AT1G76800	1	AT1G76800	locus:2030091
AT1G78170	1	AT1G78170	locus:2194709
AT2G15880	1	AT2G15880	locus:2044576
AT2G39920	1	AT2G39920	locus:2061201
AT2G46220	1	AT2G46220	locus:2062912
AT3G02250	1	AT3G02250	locus:2076552
AT3G05370	1	RLP31	locus:2096349
AT3G17040	1	HCF107	locus:2086132
AT3G29670	1	PMAT2	locus:2091798
AT3G45850	1	AT3G45850	locus:2077132
AT3G49790	1	AT3G49790	locus:2097360
AT3G61830	1	ARF18	locus:2076765
AT4G13575	1	AT4G13575	locus:4515103388
AT4G19170	1	NCED4	locus:2134796
AT4G30690	1	AT4G30690	locus:2131929
AT4G34760	1	AT4G34760	locus:2139589
AT4G37300	1	MEE59	locus:2115189
AT4G39800	1	MIPS1	locus:2135297
AT5G07080	1	AT5G07080	locus:2169459
AT5G10180	1	SULTR2;1	locus:2184158
AT5G11790	1	NDL2	locus:2181905
AT5G15150	1	HB-3	locus:2150901
AT5G16390	1	CAC1	locus:2171307
AT5G19530	1	ACL5	locus:2180816
AT5G23870	1	AT5G23870	locus:2172833
AT5G41140	1	AT5G41140	locus:2162996
AT5G51310	1	AT5G51310	locus:2176237
AT5G54510	1	DFL1	locus:2147314
AT5G63180	1	AT5G63180	locus:2161992
ATCG00560	1	PSBL	locus:504954679
AT1G01900	1	SBTI1.1	locus:2025457
AT1G09310	1	AT1G09310	locus:2203043
AT1G15140	1	AT1G15140	locus:2037708
AT1G19720	1	AT1G19720	locus:2013079
AT1G26570	1	UGD1	locus:2197945
AT1G29395	1	COR413IM1	locus:505006154
AT1G32540	1	LOL1	locus:2206649
AT1G35612	1	AT1G35612	locus:2824696
AT1G61300	1	AT1G61300	locus:2197739
AT1G64720	1	CP5	locus:2010836
AT1G67910	1	AT1G67910	locus:2200276
AT1G68780	1	AT1G68780	locus:2012433
AT1G70100	1	AT1G70100	locus:2020623
AT1G71695	1	AT1G71695	locus:2013001
AT1G77690	1	LAX3	locus:2203226
AT2G02020	1	PTR4	locus:2041140
AT2G16750	1	AT2G16750	locus:2059919
AT2G25480	1	AT2G25480	locus:2040090
AT2G26580	1	YAB5	locus:2066311
AT2G30790	1	PSBP-2	locus:2054482
AT2G35260	1	AT2G35260	locus:2063484
AT2G37460	1	UMAMIT12	locus:2049847
AT2G41170	1	AT2G41170	locus:2063167
AT2G41540	1	GPDHC1	locus:2062734
AT2G47400	1	CP12-1	locus:2065220
AT3G02110	1	scpl25	locus:2078598
AT3G10405	1	AT3G10405	locus:504955888
AT3G12110	1	ACT11	locus:2099302
AT3G15095	1	HCF243	locus:2086345
AT3G23480	1	AT3G23480	locus:2088722
AT3G25690	1	CHUP1	locus:2102385
AT3G44735	1	PSK3	locus:505006386
AT3G47560	1	AT3G47560	locus:2079127
AT3G59060	1	PIL6	locus:2077680
AT3G60530	1	GATA4	locus:2103346
AT4G00880	1	AT4G00880	locus:2134598
AT4G01330	1	AT4G01330	locus:2125038
AT4G01450	1	UMAMIT30	locus:2116967
AT4G04890	1	PDF2	locus:2135368
AT4G05180	1	PSBQ-2	locus:2115703
AT4G05631	1	AT4G05631	locus:504955508
AT4G11211	1	AT4G11211	locus:1006230329
AT4G13493	1	MIR850A	locus:4515103384
AT4G13495	1	AT4G13495	locus:4010713884
AT4G14540	1	NF-YB3	locus:2129885
AT4G23890	1	NdhS	locus:2138091
AT5G09760	1	AT5G09760	locus:2144806
AT5G13650	1	SVR3	locus:2173169
AT5G14920	1	AT5G14920	locus:2147810
AT5G17230	1	PSY	locus:2167225
AT5G19940	1	AT5G19940	locus:2147720
AT5G22310	1	AT5G22310	locus:2176387
AT5G22620	1	AT5G22620	locus:2162449
AT5G35490	1	MRU1	locus:2169558
AT5G35738	1	AT5G35738	locus:1006230598
AT5G36170	1	HCF109	locus:2158936
AT5G64770	1	RGF9	locus:2176060
AT5G64840	1	ABCF5	locus:2177689
AT5G66310	1	AT5G66310	locus:2155051
ATCG00150	1	ATPI	locus:504954639
ATCG00160	1	RPS2	locus:504954640
ATCG00180	1	RPOC1	locus:504954642
ATCG00220	1	PSBM	locus:504954646
ATCG00380	1	RPS4	locus:504954662
ATCG00470	1	ATPE	locus:504954670
ATCG00510	1	PSAI	locus:504954674
ATCG00520	1	YCF4	locus:504954675
ATCG00540	1	PETA	locus:504954677
ATCG00630	1	PSAJ	locus:504954686
ATCG00820	1	RPS19	locus:504954705
ATCG01020	1	RPL32	locus:504954725
ATCG01050	1	NDHD	locus:504954728
ATCG01130	1	YCF1.2	locus:504954736
AT1G02390	1	GPAT2	locus:2204818
AT1G05810	1	RABA5E	locus:2198768
AT1G08520	1	ALB1	locus:2201796
AT1G12630	1	AT1G12630	locus:2195062
AT1G13260	1	RAV1	locus:2205319
AT1G26150	1	PERK10	locus:2028756
AT1G29720	1	AT1G29720	locus:2019337
AT1G32450	1	NRT1.5	locus:2033776
AT1G49730	1	AT1G49730	locus:2012191
AT1G52290	1	PERK15	locus:2018209
AT1G56240	1	PP2-B13	locus:2011806
AT1G56500	1	AT1G56500	locus:2010728
AT1G56520	1	AT1G56520	locus:2010733
AT1G59930	1	AT1G59930	locus:2025996
AT1G60690	1	AT1G60690	locus:2036611
AT1G68530	1	KCS6	locus:2201262
AT1G69080	1	AT1G69080	locus:2033245
AT1G70895	1	CLE17	locus:505006216
AT1G71720	1	PDE338	locus:2013051
AT1G72950	1	AT1G72950	locus:2032597
AT1G74160	1	TRM4	locus:2037318
AT1G76410	1	ATL8	locus:2011686
AT2G13610	1	ABCG5	locus:2054142
AT2G15620	1	NIR1	locus:2053654
AT2G17230	1	EXL5	locus:2059652
AT2G17550	1	TRM26	locus:2053883
AT2G18890	1	AT2G18890	locus:2044420
AT2G20260	1	PSAE-2	locus:2038942
AT2G22795	1	AT2G22795	locus:504955937
AT2G22830	1	SQE2	locus:2059196
AT2G24270	1	ALDH11A3	locus:2047485
AT2G24645	1	AT2G24645	locus:6530298182
AT2G26250	1	KCS10	locus:2057706
AT2G26910	1	ABCG32	locus:2039523
AT2G27680	1	AT2G27680	locus:2042124
AT2G28470	1	BGAL8	locus:2056623
AT2G28630	1	KCS12	locus:2065499
AT2G29980	1	FAD3	locus:2005508
AT2G43010	1	PIF4	locus:2053733
AT2G47450	1	CAO	locus:2062046
AT3G06150	1	AT3G06150	locus:2082455
AT3G11820	1	SYP121	locus:2081476
AT3G16520	1	UGT88A1	locus:2088339
AT3G23400	1	FIB4	locus:2090890
AT3G23820	1	GAE6	locus:2076066
AT3G24480	1	AT3G24480	locus:2094854
AT3G25500	1	AFH1	locus:2094493
AT3G26070	1	AT3G26070	locus:2092150
AT3G28960	1	AT3G28960	locus:2087012
AT3G29320	1	PHS1	locus:2093787
AT3G43960	1	AT3G43960	locus:2097104
AT3G46550	1	SOS5	locus:2075185
AT3G48350	1	CEP3	locus:505006391
AT3G53470	1	AT3G53470	locus:2084071
AT3G57470	1	AT3G57470	locus:2103523
AT3G61750	1	AT3G61750	locus:2076770
AT3G63450	1	AT3G63450	locus:2087428
AT4G00180	1	YAB3	locus:2126931
AT4G00230	1	XSP1	locus:2126896
AT4G00360	1	CYP86A2	locus:2126051
AT4G01935	1	AT4G01935	locus:504955233
AT4G13340	1	LRX3	locus:2142105
AT4G13840	1	AT4G13840	locus:2119480
AT4G15110	1	CYP97B3	locus:2129695
AT4G15560	1	CLA1	locus:2130374
AT4G17100	1	AT4G17100	locus:2130519
AT4G18670	1	AT4G18670	locus:2124142
AT4G20140	1	GSO1	locus:2120362
AT4G20900	1	MS5	locus:2133099
AT4G22160	1	AT4G22160	locus:2132011
AT4G27280	1	AT4G27280	locus:2131759
AT4G27430	1	CIP7	locus:2124039
AT4G27520	1	ENODL2	locus:2137672
AT4G30110	1	HMA2	locus:2126490
AT4G32060	1	AT4G32060	locus:2116662
AT4G32190	1	AT4G32190	locus:2116500
AT5G03050	1	AT5G03050	locus:2143518
AT5G06670	1	AT5G06670	locus:2144103
AT5G14970	1	AT5G14970	locus:2147875
AT5G23860	1	TUB8	locus:505006632
AT5G27360	1	SFP2	locus:2146365
AT5G34795	1	AT5G34795	locus:504956377
AT5G37360	1	AT5G37360	locus:2169150
AT5G41810	1	AT5G41810	locus:2153005
AT5G43020	1	AT5G43020	locus:2167781
AT5G45310	1	AT5G45310	locus:2158460
AT5G47230	1	ERF5	locus:2171529
AT5G51560	1	AT5G51560	locus:2153097
AT5G61600	1	ERF104	locus:2151591
AT5G62100	1	BAG2	locus:2174038
AT5G62670	1	HA11	locus:2172244
AT5G64330	1	NPH3	locus:2173418
AT5G64660	1	CMPG2	locus:2174814
AT5G66850	1	MAPKKK5	locus:2174969
AT5G67070	1	RALFL34	locus:2155553
ATCG00170	1	RPOC2	locus:504954641
ATCG00190	1	RPOB	locus:504954643
ATCG00310	1	TRNG.2	locus:504954655
ATCG00320	1	TRNFM	locus:504954656
ATCG00570	1	PSBF	locus:504954680
ATCG00610	1	TRNW	locus:504954684
ATCG00680	1	PSBB	locus:504954691
ATCG00710	1	PSBH	locus:504954694
ATCG00740	1	RPOA	locus:504954697
ATCG00770	1	RPS8	locus:504954700
ATCG00790	1	RPL16	locus:504954702
ATCG00800	1	RPS3	locus:504954703
AT1G10020	1	AT1G10020	locus:2201881
AT1G23480	1	CSLA03	locus:2028862
AT1G27460	1	NPGR1	locus:2016029
AT1G51440	1	AT1G51440	locus:2033959
AT1G60160	1	AT1G60160	locus:2195688
AT1G62630	1	AT1G62630	locus:2203881
AT1G64670	1	BDG1	locus:2019464
AT1G67400	1	AT1G67400	locus:2019544
AT1G70610	1	ABCB26	locus:2026790
AT1G73530	1	AT1G73530	locus:2206850
AT1G74810	1	BOR5	locus:2037240
AT2G04780	1	FLA7	locus:2049218
AT2G25840	1	OVA4	locus:2043570
AT2G34060	1	AT2G34060	locus:2055501
AT2G45600	1	AT2G45600	locus:2043644
AT3G01810	1	AT3G01810	locus:2082319
AT3G02170	1	LNG2	locus:2076557
AT3G17050	1	AT3G17050	locus:2086147
AT3G21950	1	AT3G21950	locus:2095572
AT3G22420	1	WNK2	locus:2087857
AT3G23840	1	AT3G23840	locus:2076136
AT3G25660	1	AT3G25660	locus:2102380
AT3G47295	1	AT3G47295	locus:505006387
AT3G48260	1	WNK3	locus:504955638
AT3G53530	1	NAKR3	locus:2083966
AT3G54400	1	AT3G54400	locus:2096139
AT3G60390	1	HAT3	locus:2103396
AT4G02130	1	GATL6	locus:2132218
AT4G13770	1	CYP83A1	locus:2119500
AT4G20940	1	GHR1	locus:2133049
AT4G35030	1	AT4G35030	locus:2131616
AT5G17870	1	PSRP6	locus:2170328
AT5G19250	1	AT5G19250	locus:2182162
AT5G24920	1	GDU5	locus:2149448
AT5G25980	1	TGG2	locus:2180567
AT5G44650	1	CEST	locus:2152165
AT5G50335	1	AT5G50335	locus:505006686
AT5G66640	1	DAR3	locus:2173619
ATCG00210	1	YCF6	locus:504954645
ATCG00410	1	TRNF	locus:1005028048
ATCG00600	1	PETG	locus:504954683
ATCG00730	1	PETD	locus:504954696
ATCG00760	1	RPL36	locus:504954699
ATCG01060	1	PSAC	locus:504954729
ATCG01080	1	NDHG	locus:504954731
ATCG01090	1	NDHI	locus:504954732
ATMG00280	1	ORF110A	locus:504954511
AT1G23740	1	AOR	locus:2034802
AT1G53670	1	MSRB1	locus:2024817
AT2G26080	1	GLDP2	locus:2057464
AT2G47590	1	PHR2	locus:2061961
AT3G11945	1	HST	locus:4010713740
AT3G47650	1	AT3G47650	locus:2079132
AT3G52290	1	IQD3	locus:2100504
AT3G52750	1	FTSZ2-2	locus:2083258
AT4G18370	1	DEG5	locus:2124509
AT4G20360	1	RABE1b	locus:2128615
AT5G03940	1	CPSRP54	locus:2150620
AT5G20140	1	HBP5	locus:2149239
AT5G22800	1	EMB1030	locus:504954871
AT5G42270	1	VAR1	locus:2157637
AT5G47190	1	AT5G47190	locus:2171609
AT5G52960	1	AT5G52960	locus:2168352
ATCG00030	1	TRNK	locus:504954627
ATCG00040	1	MATK	locus:504954628
ATCG00100	1	TRNG.1	locus:504954634
ATCG00400	1	TRNL.1	locus:504954664
ATCG00750	1	RPS11	locus:504954698
ATCG00780	1	RPL14	locus:504954701
AT1G32550	1	FdC2	locus:2206644
AT1G56250	1	PP2-B14	locus:2011791
AT1G70210	1	CYCD1;1	locus:2020663
AT3G15760	1	AT3G15760	locus:2093277
AT3G54900	1	CXIP1	locus:2082647
AT4G00970	1	CRK41	locus:2134603
AT4G31000	1	AT4G31000	locus:2126679
AT4G33110	1	AT4G33110	locus:2125924
AT5G16810	1	AT5G16810	locus:2149040
AT5G19240	1	AT5G19240	locus:2182152
AT5G51460	1	ATTPPA	locus:2153082
AT5G59030	1	COPT1	locus:2153306
AT5G62430	1	CDF1	locus:2154079
AT1G05630	1	5PTASE13	locus:2031933
AT2G26975	1	COPT6	locus:504955951
AT4G10770	1	OPT7	locus:2132736
AT4G11460	1	CRK30	locus:2123116
AT5G43620	1	AT5G43620	locus:2158362
AT5G46470	1	RPS6	locus:2151506
AT1G20650	1	ASG5	locus:2034344
AT1G22250	1	AT1G22250	locus:2015026
AT1G27120	1	AT1G27120	locus:2205774
AT1G33600	1	AT1G33600	locus:2197586
AT1G66500	1	AT1G66500	locus:2029002
AT1G69160	1	AT1G69160	locus:2033228
AT1G73655	1	AT1G73655	locus:505006221
AT2G21380	1	AT2G21380	locus:2050044
AT2G21590	1	APL4	locus:2049364
AT2G23610	1	MES3	locus:2046862
AT2G26530	1	AR781	locus:2066236
AT2G28410	1	AT2G28410	locus:2057532
AT2G40230	1	AT2G40230	locus:2065064
AT2G45970	1	CYP86A8	locus:2050787
AT3G01750	1	AT3G01750	locus:2082344
AT3G19030	1	AT3G19030	locus:2085899
AT3G21550	1	DMP2	locus:2089865
AT3G28160	1	AT3G28160	locus:2089745
AT3G51600	1	LTP5	locus:2081855
AT3G62110	1	AT3G62110	locus:2098038
AT4G01995	1	AT4G01995	locus:504955232
AT4G04350	1	EMB2369	locus:2134887
AT4G09760	1	AT4G09760	locus:2118450
AT4G17350	1	AT4G17350	locus:2130888
AT4G17870	1	PYR1	locus:2141040
AT4G19520	1	AT4G19520	locus:2122980
AT5G06930	1	AT5G06930	locus:2169349
AT5G15070	1	AT5G15070	locus:2147890
AT5G49100	1	AT5G49100	locus:2155164
AT5G63700	1	AT5G63700	locus:2160629
AT1G04040	1	AT1G04040	locus:2024102
AT1G06645	1	AT1G06645	locus:2824199
AT1G08390	1	AT1G08390	locus:2201846
AT1G13820	1	AT1G13820	locus:2014774
AT1G14270	1	AT1G14270	locus:2012487
AT1G17220	1	FUG1	locus:2020427
AT1G18030	1	AT1G18030	locus:2194035
AT1G18360	1	AT1G18360	locus:2014084
AT1G22700	1	AT1G22700	locus:2199639
AT1G31920	1	AT1G31920	locus:2034456
AT1G49010	1	AT1G49010	locus:2028461
AT1G53800	1	AT1G53800	locus:2197031
AT1G59840	1	CCB4	locus:2025896
AT1G60550	1	ECHID	locus:2036626
AT1G64860	1	SIGA	locus:2010871
AT1G66130	1	AT1G66130	locus:2013805
AT1G66430	1	AT1G66430	locus:2028987
AT1G68330	1	AT1G68330	locus:2199347
AT1G72030	1	AT1G72030	locus:2030306
AT1G72640	1	AT1G72640	locus:2030270
AT1G73060	1	LPA3	locus:2032662
AT1G73600	1	AT1G73600	locus:2027779
AT1G75350	1	emb2184	locus:2018442
AT1G79850	1	RPS17	locus:2017849
AT1G80050	1	APT2	locus:2016309
AT1G80380	1	AT1G80380	locus:2034260
AT2G17650	1	AT2G17650	locus:2057249
AT2G17695	1	AT2G17695	locus:1005716645
AT2G17972	1	AT2G17972	locus:505006252
AT2G21370	1	XK-1	locus:2050029
AT2G21385	1	AT2G21385	locus:505006264
AT2G24020	1	AT2G24020	locus:2061471
AT2G26330	1	ER	locus:2005507
AT2G28800	1	ALB3	locus:2053230
AT2G32090	1	AT2G32090	locus:2045482
AT2G33450	1	PRPL28	locus:2051023
AT2G33800	1	EMB3113	locus:2057645
AT2G36000	1	EMB3114	locus:2039240
AT2G36145	1	AT2G36145	locus:505006299
AT2G36990	1	SIGF	locus:2057996
AT2G38460	1	IREG1	locus:2057222
AT2G38540	1	LP1	locus:2064212
AT2G38780	1	AT2G38780	locus:2040369
AT2G42690	1	AT2G42690	locus:2041599
AT2G46910	1	AT2G46910	locus:2041454
AT2G47940	1	DEG2	locus:2043403
AT3G02870	1	VTC4	locus:2075392
AT3G04910	1	WNK1	locus:2114845
AT3G06130	1	AT3G06130	locus:2082425
AT3G09050	1	AT3G09050	locus:2095299
AT3G09210	1	PTAC13	locus:2083584
AT3G13120	1	AT3G13120	locus:2089984
AT3G16000	1	MFP1	locus:2093462
AT3G18390	1	EMB1865	locus:2094997
AT3G19850	1	AT3G19850	locus:2092301
AT3G23760	1	AT3G23760	locus:2095218
AT3G26490	1	AT3G26490	locus:2079296
AT3G26900	1	SKL1	locus:2088469
AT3G26932	1	DRB3	locus:2829928
AT3G28180	1	CSLC04	locus:2089730
AT3G45680	1	AT3G45680	locus:2102659
AT3G47980	1	AT3G47980	locus:2097945
AT3G50700	1	IDD2	locus:2101739
AT3G51420	1	SSL4	locus:2081830
AT3G51820	1	G4	locus:2074393
AT3G55250	1	PDE329	locus:2100691
AT3G56040	1	UGP3	locus:2082038
AT3G62750	1	BGLU8	locus:2081680
AT3G62910	1	APG3	locus:2099137
AT3G63490	1	EMB3126	locus:2087388
AT4G01050	1	TROL	locus:2124998
AT4G02920	1	AT4G02920	locus:2139315
AT4G04340	1	AT4G04340	locus:2134882
AT4G04630	1	AT4G04630	locus:2125796
AT4G04692	1	AT4G04692	locus:504955362
AT4G05090	1	AT4G05090	locus:2115698
AT4G09040	1	AT4G09040	locus:2122368
AT4G12917	1	AT4G12917	locus:4010713881
AT4G19100	1	PAM68	locus:1006589876
AT4G19530	1	AT4G19530	locus:2122985
AT4G20130	1	PTAC14	locus:2119822
AT4G21620	1	AT4G21620	locus:2119003
AT4G22290	1	AT4G22290	locus:2132075
AT4G24750	1	AT4G24750	locus:2121994
AT4G30410	1	AT4G30410	locus:2118676
AT4G31530	1	AT4G31530	locus:2125289
AT4G31850	1	PGR3	locus:2116772
AT4G34830	1	MRL1	locus:2116915
AT4G34900	1	XDH2	locus:2116910
AT4G35920	1	MCA1	locus:2125369
AT4G36250	1	ALDH3F1	locus:2122224
AT4G36280	1	CRH1	locus:2122254
AT4G36540	1	BEE2	locus:2115200
AT4G40045	1	AT4G40045	locus:505006574
AT5G03150	1	JKD	locus:2143543
AT5G04810	1	AT5G04810	locus:2175443
AT5G08650	1	AT5G08650	locus:2159572
AT5G09820	1	AT5G09820	locus:2178133
AT5G13770	1	AT5G13770	locus:2177115
AT5G14060	1	CARAB-AK-LYS	locus:2174708
AT5G16540	1	ZFN3	locus:2171407
AT5G16710	1	DHAR3	locus:2149015
AT5G21222	1	AT5G21222	locus:1005716169
AT5G24314	1	PTAC7	locus:504954893
AT5G35480	1	AT5G35480	locus:2169553
AT5G35630	1	GS2	locus:2165897
AT5G35750	1	HK2	locus:2177261
AT5G45650	1	AT5G45650	locus:2171938
AT5G45720	1	AT5G45720	locus:2172013
AT5G47110	1	LIL3:2	locus:2151972
AT5G51545	1	LPA2	locus:1009023492
AT5G54380	1	THE1	locus:2151349
AT5G54600	1	RPL24	locus:2172154
AT5G55220	1	AT5G55220	locus:2161640
AT5G55740	1	CRR21	locus:2162207
AT5G56850	1	AT5G56850	locus:2165111
AT5G56860	1	GNC	locus:2170277
AT5G57040	1	AT5G57040	locus:2164600
AT5G57930	1	APO2	locus:2174438
AT5G65220	1	AT5G65220	locus:2171835
AT5G65390	1	AGP7	locus:2168220
AT5G67385	1	AT5G67385	locus:504954965
AT1G03680	1	THM1	locus:2020813
AT1G04250	1	AXR3	locus:2018374
AT1G04640	1	LIP2	locus:2197818
AT1G05310	1	AT1G05310	locus:2207245
AT1G14030	1	LSMT-L	locus:2014764
AT1G17030	1	AT1G17030	locus:2020397
AT1G17840	1	ABCG11	locus:2030898
AT1G18170	1	AT1G18170	locus:2194065
AT1G18485	1	AT1G18485	locus:505006130
AT1G28100	1	AT1G28100	locus:2010539
AT1G30190	1	AT1G30190	locus:2202482
AT1G43790	1	TED6	locus:2029132
AT1G49490	1	AT1G49490	locus:2010247
AT1G50250	1	FTSH1	locus:2011952
AT1G51500	1	ABCG12	locus:2033899
AT1G54790	1	AT1G54790	locus:2199496
AT1G58070	1	AT1G58070	locus:2196276
AT1G61170	1	AT1G61170	locus:2008450
AT1G61795	1	AT1G61795	locus:4010713574
AT1G62250	1	AT1G62250	locus:2018082
AT1G64150	1	AT1G64150	locus:2024628
AT1G65260	1	PTAC4	locus:2206290
AT1G74290	1	AT1G74290	locus:2019677
AT1G75100	1	JAC1	locus:2037256
AT2G04700	1	AT2G04700	locus:2049228
AT2G07080	1	AT2G07080	locus:2060182
AT2G14910	1	AT2G14910	locus:2060495
AT2G15050	1	LTP	locus:2055828
AT2G15060	1	AT2G15060	locus:2055756
AT2G16280	1	KCS9	locus:2042684
AT2G21530	1	AT2G21530	locus:2050034
AT2G21830	1	AT2G21830	locus:2052531
AT2G25250	1	AT2G25250	locus:2059579
AT2G32440	1	KAO2	locus:2062623
AT2G32690	1	GRP23	locus:2046447
AT2G33250	1	AT2G33250	locus:2046550
AT2G33855	1	AT2G33855	locus:504955963
AT2G35760	1	AT2G35760	locus:2058744
AT2G35830	1	AT2G35830	locus:2039305
AT2G35860	1	FLA16	locus:2039270
AT2G36895	1	AT2G36895	locus:1005716637
AT2G38320	1	TBL34	locus:2057145
AT2G39190	1	ATATH8	locus:2056123
AT2G41290	1	SSL2	locus:2040312
AT2G46250	1	AT2G46250	locus:2062877
AT3G05410	1	AT3G05410	locus:2079792
AT3G06140	1	LUL4	locus:2082440
AT3G13980	1	AT3G13980	locus:2088192
AT3G18050	1	AT3G18050	locus:2092732
AT3G18110	1	EMB1270	locus:2092712
AT3G20300	1	AT3G20300	locus:2092424
AT3G27025	1	AT3G27025	locus:2829872
AT3G33004	1	AT3G33004	locus:2830384
AT3G45780	1	PHOT1	locus:2102674
AT3G50270	1	AT3G50270	locus:2074775
AT3G53130	1	LUT1	locus:2102023
AT3G54600	1	DJ1F	locus:2096986
AT3G63540	1	AT3G63540	locus:5019474795
AT4G01800	1	AGY1	locus:2141335
AT4G08114	1	AT4G08114	locus:504955450
AT4G13830	1	J20	locus:2119465
AT4G14890	1	FdC1	locus:2130424
AT4G14940	1	AO1	locus:2129520
AT4G21210	1	RP1	locus:2127413
AT4G23020	1	TRM11	locus:2127178
AT4G24090	1	AT4G24090	locus:2135011
AT4G25960	1	ABCB2	locus:2120805
AT4G28050	1	TET7	locus:2132992
AT4G29060	1	emb2726	locus:2119946
AT4G32980	1	ATH1	locus:2005494
AT4G33500	1	AT4G33500	locus:2119246
AT4G33810	1	AT4G33810	locus:2134293
AT4G34610	1	BLH6	locus:2139614
AT4G35420	1	DRL1	locus:2122093
AT4G35440	1	CLC-E	locus:2117602
AT5G01920	1	STN8	locus:2181067
AT5G08280	1	HEMC	locus:2150758
AT5G08410	1	FTRA2	locus:2150808
AT5G12860	1	DiT1	locus:2182270
AT5G14260	1	AT5G14260	locus:2145663
AT5G16080	1	CXE17	locus:2146097
AT5G19500	1	AT5G19500	locus:2180801
AT5G23060	1	CaS	locus:2178287
AT5G24065	1	AT5G24065	locus:5019474857
AT5G31909	1	AT5G31909	locus:1005716889
AT5G45730	1	AT5G45730	locus:2172023
AT5G46420	1	AT5G46420	locus:2151461
AT5G48920	1	TED7	locus:2154399
AT5G51820	1	PGM	locus:2165351
AT5G53486	1	AT5G53486	locus:4010714051
AT5G54770	1	THI1	locus:2160130
AT5G58550	1	EOL2	locus:2171243
AT5G59050	1	AT5G59050	locus:2153316
AT5G62220	1	GT18	locus:2167933
AT5G64290	1	DIT2.1	locus:2173358
ATCG00020	1	PSBA	locus:504954626
ATCG00360	1	YCF3	locus:504954660
ATCG00370	1	TRNS.3	locus:504954661
ATCG00530	1	YCF10	locus:504954676
ATCG00620	1	TRNP	locus:504954685
ATCG00810	1	RPL22	locus:504954704
ATCG01230	1	RPS12B	locus:504954475
ATCG01260	1	TRNL.4	locus:504954478
AT1G01610	1	GPAT4	locus:2025381
AT1G01620	1	PIP1C	locus:2025391
AT1G04160	1	XIB	locus:2020270
AT1G11410	1	AT1G11410	locus:2200136
AT1G21070	1	AT1G21070	locus:2199557
AT1G31230	1	AK-HSDH I	locus:2029564
AT1G35340	1	AT1G35340	locus:2206732
AT1G42470	1	AT1G42470	locus:2035878
AT1G51080	1	AT1G51080	locus:2026021
AT1G52870	1	AT1G52870	locus:2011496
AT1G55380	1	AT1G55380	locus:2035641
AT1G62835	1	AT1G62835	locus:2825214
AT1G64380	1	AT1G64380	locus:2014185
AT1G65190	1	AT1G65190	locus:2200375
AT1G75380	1	BBD1	locus:2018422
AT2G18290	1	APC10	locus:2062106
AT2G26690	1	AT2G26690	locus:2043803
AT2G27290	1	AT2G27290	locus:2039610
AT2G30424	1	TCL2	locus:4515102929
AT2G31040	1	AT2G31040	locus:2052836
AT2G31790	1	AT2G31790	locus:2045268
AT2G35960	1	NHL12	locus:2039210
AT2G36500	1	AT2G36500	locus:2044840
AT2G37660	1	AT2G37660	locus:2040716
AT2G38300	1	AT2G38300	locus:2042927
AT2G42580	1	TTL3	locus:2041559
AT3G02020	1	AK3	locus:2078638
AT3G05910	1	AT3G05910	locus:2074459
AT3G24630	1	TRM34	locus:2093156
AT3G27925	1	DEG1	locus:2086420
AT3G45650	1	NAXT1	locus:2085647
AT3G46970	1	PHS2	locus:2075576
AT3G47860	1	CHL	locus:2100407
AT3G54690	1	SETH3	locus:2102440
AT3G54830	1	AT3G54830	locus:2082652
AT3G56010	1	AT3G56010	locus:2082088
AT3G58990	1	IPMI1	locus:2077685
AT3G62550	1	AT3G62550	locus:2096089
AT4G08112	1	AT4G08112	locus:504955394
AT4G12030	1	BAT5	locus:2118021
AT4G14040	1	SBP2	locus:2129356
AT4G18810	1	AT4G18810	locus:2124107
AT4G27720	1	AT4G27720	locus:2137707
AT4G28025	1	AT4G28025	locus:505006527
AT4G28740	1	AT4G28740	locus:2117803
AT4G39040	1	AT4G39040	locus:2120282
AT5G05290	1	EXPA2	locus:2153569
AT5G07110	1	PRA1.B6	locus:2169364
AT5G12470	1	AT5G12470	locus:505006615
AT5G15350	1	ENODL17	locus:2150951
AT5G51780	1	AT5G51780	locus:2165311
AT5G55990	1	CBL2	locus:2161760
AT5G66590	1	AT5G66590	locus:2154835
ATCG00550	1	PSBJ	locus:504954678
ATCG00700	1	PSBN	locus:504954693
AT1G14280	2	PKS2	locus:2012502
AT1G14920	2	GAI	locus:2006747
AT1G25440	2	BBX15	locus:2031180
AT1G49470	2	AT1G49470	locus:2010252
AT1G56020	2	AT1G56020	locus:2012065
AT1G60010	2	AT1G60010	locus:2202690
AT1G61226	2	MIR846A	locus:4515102696
AT1G62030	2	AT1G62030	locus:2036838
AT1G68520	2	BBX14	locus:2201277
AT1G78090	2	TPPB	locus:2194704
AT2G34150	2	AT2G34150	locus:2055511
AT2G44670	2	AT2G44670	locus:2042416
AT3G03850	2	SAUR26	locus:2079344
AT3G22104	2	AT3G22104	locus:2095637
AT3G24900	2	RLP39	locus:2087253
AT3G57520	2	SIP2	locus:2103488
AT3G63200	2	PLP9	locus:2077269
AT4G11550	2	AT4G11550	locus:2123131
AT4G34770	2	AT4G34770	locus:2116860
AT4G36240	2	GATA7	locus:2122214
AT4G36410	2	UBC17	locus:2115425
AT4G37890	2	EDA40	locus:2121008
AT5G01790	2	AT5G01790	locus:2181027
AT5G22090	2	AT5G22090	locus:504956461
AT5G23370	2	AT5G23370	locus:2166806
AT5G46690	2	bHLH071	locus:2178560
AT5G65170	2	AT5G65170	locus:2171785
ATCG00590	2	ORF31	locus:504954682
AT1G30820	2	AT1G30820	locus:2196984
AT2G39570	2	ACR9	locus:2039782
AT2G47560	2	AT2G47560	locus:2062008
AT3G30775	2	ERD5	locus:2089706
AT3G54880	2	AT3G54880	locus:2082707
AT4G28720	2	YUC8	locus:2117783
AT5G60760	2	AT5G60760	locus:2159270
AT1G20840	2	TMT1	locus:2030377
AT2G21340	2	AT2G21340	locus:2050140
AT2G39850	2	AT2G39850	locus:2061131
AT3G15270	2	SPL5	locus:2087105
AT3G61060	2	PP2-A13	locus:2100997
AT3G62960	2	AT3G62960	locus:2099197
AT4G03210	2	XTH9	locus:2125437
AT4G35770	2	SEN1	locus:2128038
AT5G15830	2	bZIP3	locus:2143191
AT5G20250	2	DIN10	locus:2149284
AT5G63850	2	AAP4	locus:2163981
AT5G65140	2	TPPJ	locus:2171850
AT1G23130	2	AT1G23130	locus:2201195
AT1G29440	2	SAUR63	locus:2013598
AT1G29460	2	AT1G29460	locus:2013618
AT1G62480	2	AT1G62480	locus:2203926
AT2G19800	2	MIOX2	locus:2052015
AT3G15450	2	AT3G15450	locus:2090116
AT3G15630	2	AT3G15630	locus:2093247
AT3G25717	2	RTFL16	locus:1005716552
AT5G08350	2	AT5G08350	locus:2150823
AT5G16530	2	PIN5	locus:2171392
AT5G18510	2	AT5G18510	locus:2146218
AT5G54550	2	AT5G54550	locus:2172114
AT5G61440	2	ACHT5	locus:2163168
AT1G03580	2	AT1G03580	locus:504956281
AT1G22160	2	AT1G22160	locus:2030611
AT1G29430	2	AT1G29430	locus:2013593
AT1G29500	2	AT1G29500	locus:2013698
AT1G60060	2	AT1G60060	locus:2202735
AT1G63180	2	UGE3	locus:2015253
AT1G68810	2	AT1G68810	locus:2012393
AT1G76610	2	AT1G76610	locus:2011766
AT1G78020	2	AT1G78020	locus:2029421
AT3G15620	2	UVR3	locus:2093217
AT3G19550	2	AT3G19550	locus:2101515
AT3G23000	2	CIPK7	locus:2094553
AT3G23050	2	IAA7	locus:2094598
AT3G45160	2	AT3G45160	locus:2096850
AT3G63088	2	RTFL14	locus:4010713850
AT4G19850	2	PP2-A2	locus:2133960
AT4G24050	2	AT4G24050	locus:2134971
AT5G09990	2	PROPEP5	locus:2178223
AT5G14090	2	AT5G14090	locus:2174643
AT5G35760	2	AT5G35760	locus:2177276
AT5G50820	2	NAC097	locus:2157936
AT5G57780	2	P1R1	locus:2174348
AT5G58390	2	AT5G58390	locus:2161283
AT1G01070	2	UMAMIT28	locus:2200990
AT1G13430	2	ST4C	locus:2010027
AT1G49130	2	BBX17	locus:2028421
AT1G64690	2	BLT	locus:2010876
AT1G68110	2	AT1G68110	locus:2200251
AT2G15750	2	AT2G15750	locus:2053638
AT2G36400	2	GRF3	locus:2044873
AT3G08490	2	AT3G08490	locus:2103454
AT3G23630	2	IPT7	locus:2088025
AT3G30875	2	AT3G30875	locus:2829686
AT3G43670	2	AT3G43670	locus:2080173
AT3G53235	2	AT3G53235	locus:504955611
AT3G55240	2	AT3G55240	locus:2100676
AT3G60580	2	AT3G60580	locus:2103311
AT3G61490	2	AT3G61490	locus:2082787
AT4G00940	2	AT4G00940	locus:2134658
AT4G20230	2	AT4G20230	locus:2120372
AT4G23870	2	AT4G23870	locus:2138161
AT5G01600	2	FER1	locus:2149755
AT5G01610	2	AT5G01610	locus:2149770
AT5G03545	2	AT5G03545	locus:1005716176
AT5G04190	2	PKS4	locus:2146638
AT5G14940	2	AT5G14940	locus:2147840
AT5G18080	2	SAUR24	locus:2172299
AT5G18460	2	AT5G18460	locus:2146258
AT5G27220	2	AT5G27220	locus:2181241
AT5G44260	2	AT5G44260	locus:2158685
AT5G51330	2	SWI1	locus:2163645
AT5G54530	2	AT5G54530	locus:2172094
AT5G55250	2	IAMT1	locus:2161680
AT1G32190	2	AT1G32190	locus:2031725
AT1G33790	2	AT1G33790	locus:2012703
AT1G66930	2	AT1G66930	locus:2019688
AT1G73870	2	BBX16	locus:2031581
AT3G08040	2	FRD3	locus:2077477
AT3G15280	2	AT3G15280	locus:2087110
AT3G20470	2	GRP5	locus:2092394
AT3G29680	2	AT3G29680	locus:2091808
AT4G14400	2	ACD6	locus:2129690
AT4G17460	2	HAT1	locus:2129061
AT4G34980	2	SLP2	locus:2131566
AT5G18840	2	AT5G18840	locus:2144975
AT5G23020	2	IMS2	locus:2178317
AT5G23350	2	AT5G23350	locus:2166776
AT5G23360	2	AT5G23360	locus:2166791
AT5G44578	2	AT5G44578	locus:4010714045
AT5G59670	2	AT5G59670	locus:2174294
AT1G19960	2	AT1G19960	locus:2198616
AT1G31050	2	AT1G31050	locus:2015696
AT1G68650	2	AT1G68650	locus:2026879
AT1G70890	2	MLP43	locus:2013950
AT2G28250	2	NCRK	locus:2062824
AT2G28940	2	AT2G28940	locus:2053250
AT2G38090	2	AT2G38090	locus:2042872
AT2G41940	2	ZFP8	locus:2064579
AT2G44910	2	HB4	locus:2055028
AT3G10120	2	AT3G10120	locus:2100073
AT3G15320	2	AT3G15320	locus:2087090
AT4G04700	2	CPK27	locus:2138877
AT4G15500	2	UGT84A4	locus:2130225
AT4G24120	2	YSL1	locus:2134956
AT4G36850	2	AT4G36850	locus:2115270
AT5G06250	2	DPA4	locus:2164215
AT5G38970	2	BR6OX1	locus:2152292
AT5G45490	2	AT5G45490	locus:2163568
AT5G52740	2	AT5G52740	locus:2149584
AT5G18670	2	BMY3	locus:2180029
AT1G74055	2	AT1G74055	locus:505006223
AT2G23960	2	AT2G23960	locus:2061481
AT3G48240	2	AT3G48240	locus:2101175
AT4G26260	2	MIOX4	locus:2136839
AT5G55690	2	AT5G55690	locus:2162137
AT1G15040	2	GAT1_2.1	locus:2196174
AT4G22490	2	AT4G22490	locus:2127485
AT4G32280	2	IAA29	locus:2116505
AT5G57640	2	AT5G57640	locus:2174492
AT1G03010	2	AT1G03010	locus:2007564
AT1G16515	2	AT1G16515	locus:1006230703
AT1G49200	2	AT1G49200	locus:2028411
AT1G49210	2	AT1G49210	locus:2028406
AT1G49220	2	AT1G49220	locus:2028506
AT1G49230	2	AT1G49230	locus:2028436
AT1G73830	2	BEE3	locus:2027809
AT1G77020	2	AT1G77020	locus:2025252
AT1G78320	2	GSTU23	locus:2032035
AT2G18560	2	AT2G18560	locus:2046338
AT2G18570	2	AT2G18570	locus:2046328
AT2G22170	2	PLAT2	locus:2060410
AT2G34180	2	CIPK13	locus:2040824
AT3G18900	2	AT3G18900	locus:2087906
AT3G21330	2	AT3G21330	locus:2089418
AT3G28007	2	SWEET4	locus:505006381
AT3G42658	2	SADHU3-2	locus:4010713802
AT3G62610	2	MYB11	locus:2081735
AT4G03175	2	AT4G03175	locus:504955480
AT4G14130	2	XTH15	locus:2129445
AT4G25760	2	GDU2	locus:2117517
AT5G12235	2	CLE22	locus:504954845
AT5G14410	2	AT5G14410	locus:2145628
AT5G20260	2	AT5G20260	locus:2149304
AT5G43700	2	ATAUX2-11	locus:2170862
AT5G45850	2	AT5G45850	locus:2152410
AT5G49330	2	MYB111	locus:2155944
AT5G56220	2	AT5G56220	locus:2156445
AT1G13448	2	AT1G13448	locus:4010713442
AT1G13600	2	bZIP58	locus:2009932
AT1G26911	2	AT1G26911	locus:5019474623
AT1G31040	2	AT1G31040	locus:2015761
AT1G47840	2	HXK3	locus:2202410
AT1G50110	2	AT1G50110	locus:2031030
AT1G72600	2	AT1G72600	locus:2030220
AT1G75710	2	AT1G75710	locus:2005684
AT3G03660	2	WOX11	locus:2096429
AT3G24450	2	AT3G24450	locus:2094864
AT3G27500	2	AT3G27500	locus:2091418
AT3G28857	2	PRE5	locus:1006230235
AT3G48740	2	SWEET11	locus:2114540
AT3G50010	2	AT3G50010	locus:2083158
AT3G51480	2	GLR3.6	locus:2081805
AT3G60550	2	CYCP3;2	locus:2103391
AT3G61900	2	AT3G61900	locus:2079552
AT3G61950	2	AT3G61950	locus:2079512
AT4G01335	2	AT4G01335	locus:5019474800
AT4G12450	2	AT4G12450	locus:2135565
AT4G13510	2	AMT1;1	locus:2140877
AT4G22560	2	AT4G22560	locus:2127585
AT4G25410	2	AT4G25410	locus:2138024
AT4G27290	2	AT4G27290	locus:2131684
AT4G32460	2	AT4G32460	locus:2127831
AT4G37580	2	HLS1	locus:2005512
AT5G02540	2	AT5G02540	locus:2181778
AT5G02760	2	AT5G02760	locus:2151256
AT5G28030	2	DES1	locus:2143754
AT5G46830	2	NIG1	locus:2172932
AT5G47380	2	AT5G47380	locus:2171499
AT5G57090	2	EIR1	locus:2175559
AT5G58360	2	OFP3	locus:2161198
AT5G59360	2	AT5G59360	locus:2148288
AT5G62280	2	AT5G62280	locus:2167913
AT5G65690	2	PCK2	locus:504954890
AT1G04180	2	YUC9	locus:2020250
AT1G05300	2	ZIP5	locus:2207140
AT1G11340	2	AT1G11340	locus:2200111
AT1G13510	2	AT1G13510	locus:2009987
AT1G16160	2	WAKL5	locus:2200472
AT1G17400	2	AT1G17400	locus:2018821
AT2G39370	2	MAKR4	locus:2039722
AT2G40475	2	ASG8	locus:505006311
AT2G43445	2	AT2G43445	locus:4010713706
AT3G01350	2	AT3G01350	locus:2100262
AT3G13662	2	AT3G13662	locus:2091551
AT3G24300	2	AMT1;3	locus:2087173
AT3G25190	2	AT3G25190	locus:2090305
AT3G25905	2	CLE27	locus:505006378
AT3G50160	2	AT3G50160	locus:2083138
AT4G01060	2	CPL3	locus:2125008
AT4G14780	2	AT4G14780	locus:2130230
AT4G31910	2	BAT1	locus:2116757
AT4G38552	2	AT4G38552	locus:6530298228
AT5G03640	2	AT5G03640	locus:2144598
AT5G06043	2	AT5G06043	locus:1009023407
AT5G19810	2	AT5G19810	locus:2183204
AT5G22580	2	AT5G22580	locus:2171102
AT1G04370	2	ERF14	locus:2018289
AT1G52770	2	AT1G52770	locus:2011551
AT1G58390	2	AT1G58390	locus:2037639
AT2G16385	2	AT2G16385	locus:1006230017
AT3G13850	2	LBD22	locus:2087999
AT3G51750	2	AT3G51750	locus:2098277
AT4G30250	2	AT4G30250	locus:2128916
AT5G10310	2	AT5G10310	locus:2145367
AT5G11940	2	AT5G11940	locus:2143014
AT5G52860	2	ABCG8	locus:2176937
AT5G54230	2	MYB49	locus:2162585
AT1G02730	3	CSLD5	locus:2024745
AT1G05340	3	AT1G05340	locus:2207195
AT1G11040	3	AT1G11040	locus:2197429
AT1G14870	3	PCR2	locus:2006772
AT1G17860	3	AT1G17860	locus:2030923
AT1G18720	3	AT1G18720	locus:2034975
AT1G22500	3	ATL15	locus:2009527
AT1G23790	3	AT1G23790	locus:2034850
AT1G23850	3	AT1G23850	locus:2199832
AT1G27300	3	AT1G27300	locus:2015954
AT1G27340	3	LCR	locus:2015974
AT1G30320	3	AT1G30320	locus:2204197
AT1G30490	3	PHV	locus:2028140
AT1G30720	3	AT1G30720	locus:2204624
AT1G31830	3	PUT2	locus:2034451
AT1G32850	3	UBP11	locus:2037985
AT1G44608	3	AT1G44608	locus:2823676
AT1G45145	3	TRX5	locus:2825451
AT1G45180	3	AT1G45180	locus:2028225
AT1G46768	3	RAP2.1	locus:2825842
AT1G50610	3	PRK5	locus:2008061
AT1G51760	3	IAR3	locus:2017607
AT1G52760	3	LysoPL2	locus:2011511
AT1G53035	3	AT1G53035	locus:505006180
AT1G55210	3	AT1G55210	locus:2035661
AT1G55610	3	BRL1	locus:2020457
AT1G59660	3	AT1G59660	locus:2202887
AT1G64390	3	GH9C2	locus:2014205
AT1G64950	3	CYP89A5	locus:2010886
AT1G65690	3	AT1G65690	locus:2018531
AT1G66050	3	VIM2	locus:2013840
AT1G67360	3	AT1G67360	locus:2019579
AT1G68570	3	AT1G68570	locus:2026884
AT1G70130	3	AT1G70130	locus:2020593
AT1G70340	3	AT1G70340	locus:2016199
AT1G70690	3	HWI1	locus:2033614
AT1G71110	3	AT1G71110	locus:2026276
AT1G75270	3	DHAR2	locus:2025162
AT1G76040	3	CPK29	locus:2204340
AT1G77400	3	AT1G77400	locus:2031442
AT1G80450	3	AT1G80450	locus:2198943
AT1G80520	3	AT1G80520	locus:2198953
AT1G80820	3	CCR2	locus:2025832
AT2G01120	3	ORC4	locus:2045745
AT2G01150	3	RHA2B	locus:2038766
AT2G02060	3	AT2G02060	locus:2041145
AT2G06950	3	AT2G06950	locus:2063616
AT2G15490	3	UGT73B4	locus:2053669
AT2G16580	3	AT2G16580	locus:2045086
AT2G19090	3	AT2G19090	locus:2059057
AT2G25140	3	CLPB4	locus:2040159
AT2G27130	3	AT2G27130	locus:2059242
AT2G27140	3	AT2G27140	locus:2045144
AT2G27580	3	AT2G27580	locus:2042011
AT2G28620	3	AT2G28620	locus:2065505
AT2G29420	3	GSTU7	locus:2043112
AT2G29460	3	GSTU4	locus:2043017
AT2G31160	3	LSH3	locus:2055897
AT2G32190	3	AT2G32190	locus:2045522
AT2G37180	3	RD28	locus:2061763
AT2G38250	3	AT2G38250	locus:2042847
AT2G39830	3	DAR2	locus:2063932
AT2G42110	3	AT2G42110	locus:2059994
AT2G44690	3	ARAC9	locus:2042326
AT2G48010	3	RKF3	locus:2066390
AT3G02150	3	PTF1	locus:2076492
AT3G03520	3	NPC3	locus:2099654
AT3G08590	3	iPGAM2	locus:2077793
AT3G10180	3	AT3G10180	locus:2076294
AT3G12870	3	AT3G12870	locus:2090364
AT3G12915	3	AT3G12915	locus:2829525
AT3G13110	3	SERAT2;2	locus:2089974
AT3G14990	3	DJ1A	locus:2086295
AT3G15720	3	AT3G15720	locus:2093212
AT3G17690	3	CNGC19	locus:2090562
AT3G18830	3	PMT5	locus:2094034
AT3G22910	3	AT3G22910	locus:2084578
AT3G25130	3	AT3G25130	locus:2090315
AT3G25590	3	AT3G25590	locus:2102365
AT3G26290	3	CYP71B26	locus:2093561
AT3G27060	3	TSO2	locus:2092030
AT3G27510	3	AT3G27510	locus:2091413
AT3G28210	3	PMZ	locus:2098313
AT3G30180	3	BR6OX2	locus:2098802
AT3G44720	3	ADT4	locus:2101630
AT3G46500	3	AT3G46500	locus:2075130
AT3G47780	3	ABCA7	locus:2100322
AT3G48440	3	AT3G48440	locus:2101170
AT3G49120	3	PRXCB	locus:2101318
AT3G49780	3	PSK4	locus:2097345
AT3G50280	3	AT3G50280	locus:2074790
AT3G52770	3	ZPR3	locus:2083283
AT3G53190	3	AT3G53190	locus:2101998
AT3G54950	3	pPLAIIIbeta	locus:2082702
AT3G56200	3	AT3G56200	locus:2078381
AT3G56320	3	AT3G56320	locus:2078426
AT3G58520	3	AT3G58520	locus:2076361
AT3G60160	3	ABCC9	locus:2101452
AT3G61380	3	TRM14	locus:2098961
AT3G63010	3	GID1B	locus:2099152
AT3G63052	3	AT3G63052	locus:4515103313
AT4G02150	3	MOS6	locus:2132238
AT4G02710	3	NET1C	locus:2132348
AT4G02800	3	AT4G02800	locus:2140195
AT4G09030	3	AGP10	locus:2122353
AT4G10390	3	AT4G10390	locus:2122834
AT4G11350	3	AT4G11350	locus:2128283
AT4G12580	3	AT4G12580	locus:2135640
AT4G14770	3	TCX2	locus:2130220
AT4G15890	3	AT4G15890	locus:2130869
AT4G18340	3	AT4G18340	locus:2141867
AT4G18890	3	BEH3	locus:2117154
AT4G19880	3	AT4G19880	locus:2134005
AT4G20270	3	BAM3	locus:2120412
AT4G20320	3	AT4G20320	locus:2120357
AT4G24960	3	HVA22D	locus:2117318
AT4G27480	3	AT4G27480	locus:2124009
AT4G27560	3	AT4G27560	locus:2137722
AT4G27585	3	AT4G27585	locus:505006523
AT4G28290	3	AT4G28290	locus:2123683
AT4G28650	3	AT4G28650	locus:2139885
AT4G32860	3	AT4G32860	locus:2134118
AT4G34230	3	CAD5	locus:2124311
AT4G34710	3	ADC2	locus:2139629
AT4G35730	3	AT4G35730	locus:2127988
AT4G36380	3	ROT3	locus:2115220
AT4G37730	3	bZIP7	locus:2137539
AT5G01550	3	LECRKA4.2	locus:2149795
AT5G03340	3	AtCDC48C	locus:2831844
AT5G03630	3	ATMDAR2	locus:2144588
AT5G04250	3	AT5G04250	locus:2146673
AT5G06590	3	AT5G06590	locus:2144108
AT5G08240	3	AT5G08240	locus:2181574
AT5G09440	3	EXL4	locus:2184792
AT5G10930	3	CIPK5	locus:2183720
AT5G11410	3	AT5G11410	locus:2147977
AT5G12010	3	AT5G12010	locus:2143104
AT5G13180	3	NAC083	locus:2179877
AT5G15860	3	PCME	locus:2143236
AT5G16970	3	AER	locus:2148131
AT5G17980	3	AT5G17980	locus:2161523
AT5G18130	3	AT5G18130	locus:2172364
AT5G19875	3	AT5G19875	locus:505006622
AT5G20670	3	AT5G20670	locus:2180499
AT5G21105	3	AT5G21105	locus:505006625
AT5G22140	3	AT5G22140	locus:504956456
AT5G23160	3	AT5G23160	locus:2166751
AT5G23170	3	AT5G23170	locus:2166761
AT5G23580	3	CDPK9	locus:2171726
AT5G37740	3	AT5G37740	locus:2151684
AT5G38344	3	AT5G38344	locus:1009023443
AT5G42720	3	AT5G42720	locus:2165432
AT5G43420	3	AT5G43420	locus:2176436
AT5G45800	3	MEE62	locus:2171988
AT5G48690	3	AT5G48690	locus:2156489
AT5G48800	3	AT5G48800	locus:2156524
AT5G51920	3	AT5G51920	locus:2166523
AT5G54670	3	ATK3	locus:2157533
AT5G56760	3	SERAT1;1	locus:2164996
AT5G57110	3	ACA8	locus:2175579
AT5G57390	3	AIL5	locus:2173009
AT5G58210	3	AT5G58210	locus:2161298
AT5G58350	3	WNK4	locus:2161278
AT5G59780	3	MYB59	locus:2174324
AT5G60200	3	TMO6	locus:2144030
AT5G65380	3	AT5G65380	locus:2168210
AT5G65640	3	bHLH093	locus:2155725
AT5G65870	3	PSK5	locus:2152084
AT5G67080	3	MAPKKK19	locus:2155568
AT5G67090	3	AT5G67090	locus:2155583
AT5G67200	3	AT5G67200	locus:2155508
AT5G67210	3	IRX15-L	locus:2155518
AT1G06620	3	AT1G06620	locus:2009130
AT1G28580	3	AT1G28580	locus:2018758
AT1G80870	3	AT1G80870	locus:2025742
AT3G06360	3	AGP27	locus:2081121
AT3G09390	3	MT2A	locus:2083519
AT3G61890	3	HB-12	locus:2079542
AT5G67180	3	TOE3	locus:2155598
AT1G29160	3	AT1G29160	locus:2030006
AT1G31290	3	AGO3	locus:2197550
AT1G31820	3	PUT1	locus:2034461
AT1G51680	3	4CL1	locus:2017602
AT1G62790	3	AT1G62790	locus:2026257
AT2G36750	3	UGT73C1	locus:2040590
AT2G40890	3	CYP98A3	locus:2058440
AT3G13310	3	AT3G13310	locus:2088100
AT3G21240	3	4CL2	locus:2094716
AT3G44960	3	AT3G44960	locus:2075954
AT4G12290	3	AT4G12290	locus:2139069
AT4G34050	3	CCoAOMT1	locus:2124286
AT5G01370	3	ACI1	locus:2179182
AT5G13370	3	AT5G13370	locus:2181630
AT5G47880	3	ERF1-1	locus:2160972
AT5G52450	3	AT5G52450	locus:2156737
AT5G57410	3	AT5G57410	locus:2172989
AT1G49160	3	WNK7	locus:2028521
AT1G66725	3	MIR163	locus:1009023135
AT1G70470	3	AT1G70470	locus:2026851
AT3G01175	3	AT3G01175	locus:505006324
AT3G10190	3	AT3G10190	locus:2076279
AT5G04310	3	AT5G04310	locus:2179949
AT5G39090	3	AT5G39090	locus:2177212
AT5G43860	3	CLH2	locus:2170852
AT5G53120	3	SPDS3	locus:2163771
AT1G05470	3	CVP2	locus:2201016
AT1G06490	3	CalS7	locus:2009185
AT1G08160	3	AT1G08160	locus:2205180
AT1G19560	3	AT1G19560	locus:2824843
AT1G20930	3	CDKB2;2	locus:2037410
AT1G31200	3	PP2-A9	locus:2029534
AT1G33110	3	AT1G33110	locus:2206960
AT1G52140	3	AT1G52140	locus:2034071
AT1G52700	3	AT1G52700	locus:2035064
AT1G60030	3	NAT7	locus:2202700
AT1G72540	3	AT1G72540	locus:2030185
AT1G75040	3	PR5	locus:2037235
AT1G75620	3	AT1G75620	locus:2005664
AT1G75720	3	AT1G75720	locus:2005669
AT1G80300	3	NTT1	locus:2034235
AT1G80530	3	AT1G80530	locus:2198938
AT2G16850	3	PIP2;8	locus:2039385
AT2G24850	3	TAT3	locus:2047441
AT2G34490	3	CYP710A2	locus:2040929
AT2G39700	3	EXPA4	locus:2043240
AT2G41480	3	AT2G41480	locus:2060550
AT2G45750	3	AT2G45750	locus:2050679
AT2G46630	3	AT2G46630	locus:2039987
AT3G03770	3	AT3G03770	locus:2079339
AT3G07420	3	NS2	locus:2079646
AT3G15800	3	AT3G15800	locus:2093232
AT3G21690	3	AT3G21690	locus:2089955
AT3G24460	3	AT3G24460	locus:2094869
AT3G28150	3	TBL22	locus:2091388
AT3G48280	3	CYP71A25	locus:504955637
AT3G53230	3	AtCDC48B	locus:2101933
AT3G62590	3	AT3G62590	locus:2081720
AT4G15960	3	AT4G15960	locus:2129835
AT4G19060	3	AT4G19060	locus:2117164
AT4G22770	3	AT4G22770	locus:2132599
AT4G29920	3	AT4G29920	locus:2123944
AT4G33490	3	AT4G33490	locus:2119231
AT4G36220	3	FAH1	locus:2122194
AT5G04080	3	AT5G04080	locus:2150685
AT5G04680	3	AT5G04680	locus:2180223
AT5G06150	3	CYC1BAT	locus:2160722
AT5G17160	3	AT5G17160	locus:2148176
AT5G18970	3	AT5G18970	locus:2179639
AT5G20000	3	AT5G20000	locus:2147685
AT5G24620	3	AT5G24620	locus:2153929
AT5G43870	3	AT5G43870	locus:2149514
AT5G45530	3	AT5G45530	locus:2163598
AT5G45540	3	AT5G45540	locus:2163518
AT5G46700	3	TRN2	locus:2178570
AT5G50290	3	AT5G50290	locus:2157742
AT5G56720	3	c-NAD-MDH3	locus:2165066
AT5G62940	3	HCA2	locus:2170753
AT5G67470	3	FH6	locus:2158576
AT5G67550	3	AT5G67550	locus:2158581
ATMG00040	3	ORF315	locus:504954740
ATMG01410	3	ORF204	locus:504954624
AT1G02950	3	GSTF4	locus:2024765
AT1G06475	3	AT1G06475	locus:1006230677
AT1G09880	3	AT1G09880	locus:2024417
AT1G11130	3	SUB	locus:2202084
AT1G11500	3	AT1G11500	locus:2200071
AT1G11570	3	NTL	locus:2200066
AT1G13050	3	AT1G13050	locus:2031840
AT1G13195	3	AT1G13195	locus:505006120
AT1G13920	3	AT1G13920	locus:2014749
AT1G14730	3	AT1G14730	locus:2006752
AT1G15100	3	RHA2A	locus:2037683
AT1G15760	3	AT1G15760	locus:2036129
AT1G16900	3	EBS3	locus:2015601
AT1G17090	3	AT1G17090	locus:2035479
AT1G18250	3	ATLP-1	locus:2194344
AT1G19420	3	AT1G19420	locus:2824853
AT1G23530	3	AT1G23530	locus:2034790
AT1G29380	3	AT1G29380	locus:2013728
AT1G29520	3	AT1G29520	locus:2013708
AT1G29980	3	AT1G29980	locus:2198279
AT1G31550	3	AT1G31550	locus:2028661
AT1G31880	3	BRX	locus:2034486
AT1G33260	3	AT1G33260	locus:2196680
AT1G44110	3	CYCA1;1	locus:2205871
AT1G47271	3	AT1G47271	locus:4515102654
AT1G47670	3	AT1G47670	locus:2015383
AT1G49870	3	AT1G49870	locus:2007258
AT1G50490	3	UBC20	locus:2015819
AT1G53750	3	RPT1A	locus:2024822
AT1G55760	3	AT1G55760	locus:2020522
AT1G60360	3	AT1G60360	locus:2195573
AT1G61760	3	AT1G61760	locus:2195783
AT1G62400	3	HT1	locus:2027114
AT1G63310	3	AT1G63310	locus:2038436
AT1G65910	3	NAC028	locus:2009729
AT1G68170	3	UMAMIT23	locus:2199327
AT1G69580	3	AT1G69580	locus:2026739
AT1G70670	3	CLO4	locus:2033632
AT1G72250	3	AT1G72250	locus:2207011
AT1G73370	3	SUS6	locus:2206865
AT1G73690	3	CDKD1;1	locus:2027819
AT1G74720	3	QKY	locus:2019070
AT1G75730	3	AT1G75730	locus:2005654
AT1G77700	3	AT1G77700	locus:2203236
AT1G79420	3	AT1G79420	locus:2206425
AT2G01275	3	AT2G01275	locus:504956090
AT2G01913	3	AT2G01913	locus:1009023183
AT2G05840	3	PAA2	locus:2064727
AT2G07230	3	AT2G07230	locus:2060141
AT2G14620	3	XTH10	locus:2064284
AT2G17300	3	AT2G17300	locus:2827539
AT2G18950	3	HPT1	locus:2044440
AT2G20290	3	XIG	locus:2039007
AT2G23150	3	NRAMP3	locus:2045344
AT2G25060	3	ENODL14	locus:2040164
AT2G26180	3	IQD6	locus:2057459
AT2G26760	3	CYCB1;4	locus:2043818
AT2G27035	3	ENODL20	locus:1006230143
AT2G28510	3	AT2G28510	locus:2056588
AT2G28660	3	AT2G28660	locus:2065526
AT2G29410	3	MTPB1	locus:2043117
AT2G29550	3	TUB7	locus:2043082
AT2G30860	3	GSTF9	locus:2052811
AT2G34540	3	AT2G34540	locus:2062291
AT2G37590	3	DOF2.4	locus:2040746
AT2G37925	3	COPT4	locus:504955905
AT2G39020	3	AT2G39020	locus:2064900
AT2G39870	3	AT2G39870	locus:2061237
AT2G41200	3	AT2G41200	locus:2063240
AT2G41300	3	SSL1	locus:2040297
AT2G43230	3	AT2G43230	locus:2041071
AT2G44190	3	EDE1	locus:2051869
AT2G44830	3	AT2G44830	locus:2055017
AT2G44930	3	AT2G44930	locus:2055012
AT2G45900	3	TRM13	locus:2050684
AT2G46140	3	AT2G46140	locus:2062933
AT3G01680	3	SEOR1	locus:2084158
AT3G01950	3	AT3G01950	locus:2078618
AT3G03200	3	NAC045	locus:2097720
AT3G03270	3	AT3G03270	locus:2097755
AT3G03470	3	CYP89A9	locus:2099714
AT3G03773	3	AT3G03773	locus:504955859
AT3G04630	3	WDL1	locus:2084878
AT3G09070	3	OPS	locus:2095254
AT3G11520	3	CYCB1;3	locus:2080717
AT3G13590	3	AT3G13590	locus:2086814
AT3G13620	3	PUT4	locus:2086794
AT3G17380	3	AT3G17380	locus:2089045
AT3G17420	3	GPK1	locus:2093591
AT3G17680	3	AT3G17680	locus:2090547
AT3G17730	3	NAC057	locus:2089764
AT3G17820	3	GLN1.3	locus:2088580
AT3G17840	3	RLK902	locus:2088500
AT3G18260	3	AT3G18260	locus:2089663
AT3G18670	3	AT3G18670	locus:2094039
AT3G20450	3	AT3G20450	locus:2092364
AT3G20570	3	ENODL9	locus:2085775
AT3G20870	3	AT3G20870	locus:2091921
AT3G21210	3	AT3G21210	locus:2094751
AT3G21560	3	UGT84A2	locus:2089880
AT3G24770	3	CLE41	locus:2087328
AT3G25855	3	AT3G25855	locus:505006377
AT3G26840	3	PES2	locus:2088404
AT3G27360	3	AT3G27360	locus:2086696
AT3G45010	3	scpl48	locus:2075929
AT3G47180	3	AT3G47180	locus:2075641
AT3G49360	3	PGL2	locus:2082916
AT3G50070	3	CYCD3;3	locus:2083128
AT3G53540	3	TRM19	locus:2083981
AT3G54180	3	CDKB1;1	locus:2080290
AT3G54820	3	PIP2;5	locus:2082642
AT3G58350	3	RTM3	locus:2085375
AT3G60840	3	MAP65-4	locus:2101876
AT3G63000	3	NPL41	locus:2099142
AT4G01080	3	TBL26	locus:2125048
AT4G02100	3	AT4G02100	locus:2132183
AT4G05220	3	AT4G05220	locus:2115638
AT4G05430	3	AT4G05430	locus:2115919
AT4G09950	3	AT4G09950	locus:2140568
AT4G12390	3	PME1	locus:2139094
AT4G13000	3	AT4G13000	locus:2123191
AT4G13990	3	AT4G13990	locus:2129281
AT4G14740	3	AT4G14740	locus:2130185
AT4G16370	3	OPT3	locus:2130529
AT4G17790	3	AT4G17790	locus:2129485
AT4G17905	3	ATL4H	locus:4515103413
AT4G19050	3	AT4G19050	locus:2117149
AT4G21270	3	ATK1	locus:2127378
AT4G21310	3	AT4G21310	locus:2141186
AT4G22730	3	AT4G22730	locus:2132634
AT4G22920	3	NYE1	locus:2127153
AT4G23800	3	3xHMG-box2	locus:2128504
AT4G24250	3	MLO13	locus:2135982
AT4G24610	3	AT4G24610	locus:2121904
AT4G28250	3	EXPB3	locus:2123643
AT4G32670	3	AT4G32670	locus:2125632
AT4G33160	3	AT4G33160	locus:2125889
AT4G33270	3	CDC20.1	locus:2119151
AT4G34160	3	CYCD3;1	locus:2124331
AT4G35460	3	NTRB	locus:2117612
AT4G35970	3	APX5	locus:2125409
AT4G36450	3	MPK14	locus:2115445
AT4G37450	3	AGP18	locus:2126337
AT4G37650	3	SHR	locus:2120106
AT4G39790	3	AT4G39790	locus:2135292
AT5G01480	3	AT5G01480	locus:2179207
AT5G01910	3	AT5G01910	locus:2181062
AT5G03510	3	AT5G03510	locus:2142674
AT5G03530	3	RABC2A	locus:2831859
AT5G04690	3	AT5G04690	locus:2180228
AT5G04700	3	AT5G04700	locus:2175413
AT5G04890	3	RTM2	locus:2175438
AT5G05240	3	AT5G05240	locus:2153494
AT5G05270	3	CHIL	locus:2153539
AT5G07710	3	AT5G07710	locus:2160359
AT5G10520	3	RBK1	locus:2142514
AT5G11100	3	SYTD	locus:2184931
AT5G11230	3	AT5G11230	locus:2147957
AT5G19090	3	AT5G19090	locus:2179604
AT5G20870	3	AT5G20870	locus:2147112
AT5G20970	3	AT5G20970	locus:2147137
AT5G23400	3	AT5G23400	locus:2154463
AT5G23540	3	AT5G23540	locus:2171696
AT5G23720	3	PHS1	locus:2171691
AT5G24010	3	AT5G24010	locus:2178707
AT5G25370	3	PLDALPHA3	locus:2145452
AT5G28910	3	AT5G28910	locus:2148715
AT5G35740	3	AT5G35740	locus:2177256
AT5G37180	3	SUS5	locus:2166203
AT5G37630	3	EMB2656	locus:2151764
AT5G38070	3	AT5G38070	locus:2144441
AT5G46530	3	AT5G46530	locus:2151486
AT5G48060	3	AT5G48060	locus:2162712
AT5G49525	3	AT5G49525	locus:1005716786
AT5G50750	3	RGP4	locus:2163305
AT5G51600	3	PLE	locus:2153152
AT5G53030	3	AT5G53030	locus:2168407
AT5G54660	3	AT5G54660	locus:2172139
AT5G55950	3	AT5G55950	locus:2178373
AT5G57130	3	AT5G57130	locus:2175589
AT5G61160	3	AACT1	locus:2159476
AT5G61260	3	AT5G61260	locus:2163148
AT5G61280	3	AT5G61280	locus:2163178
AT5G61390	3	AT5G61390	locus:2163208
AT5G61430	3	NAC100	locus:2163153
AT5G62960	3	AT5G62960	locus:2166290
AT5G64080	3	XYP1	locus:2164411
AT5G66230	3	AT5G66230	locus:2156967
AT5G67050	3	AT5G67050	locus:2155538
AT5G67330	3	NRAMP4	locus:2158242
AT5G67460	3	AT5G67460	locus:2158571
AT5G67600	3	WIH1	locus:2158631
ATMG01280	3	ORF291	locus:504954611
AT1G03780	3	TPX2	locus:2024132
AT1G04760	3	VAMP726	locus:2010627
AT1G05770	3	AT1G05770	locus:2198693
AT1G08560	3	SYP111	locus:2025620
AT1G11572	3	AT1G11572	locus:4010713432
AT1G11910	3	APA1	locus:2008940
AT1G14900	3	HMGA	locus:2006862
AT1G15080	3	LPP2	locus:2037758
AT1G16330	3	CYCB3;1	locus:2032870
AT1G16630	3	AT1G16630	locus:2017938
AT1G18370	3	HIK	locus:2014069
AT1G18670	3	IBS1	locus:2034944
AT1G19415	3	AT1G19415	locus:2824848
AT1G19850	3	MP	locus:2035454
AT1G23040	3	AT1G23040	locus:2201185
AT1G24764	3	MAP70-2	locus:2826057
AT1G26233	3	SNOR95	locus:1009023136
AT1G31720	3	AT1G31720	locus:2028596
AT1G33475	3	AT1G33475	locus:504956331
AT1G50570	3	AT1G50570	locus:2008011
AT1G52315	3	AT1G52315	locus:1006230707
AT1G54530	3	AT1G54530	locus:2020023
AT1G56555	3	AT1G56555	locus:504956245
AT1G57670	3	AT1G57670	locus:2206495
AT1G61830	3	AT1G61830	locus:2036883
AT1G67780	3	AT1G67780	locus:2008520
AT1G68180	3	AT1G68180	locus:2199272
AT1G68230	3	AT1G68230	locus:2199322
AT1G68430	3	AT1G68430	locus:2202349
AT1G68820	3	AT1G68820	locus:2012453
AT1G69325	3	AT1G69325	locus:1005716754
AT1G70505	3	AT1G70505	locus:504956261
AT1G71140	3	AT1G71140	locus:2026311
AT1G73850	3	AT1G73850	locus:2027844
AT1G75260	3	AT1G75260	locus:2025172
AT1G75280	3	AT1G75280	locus:2025192
AT1G75700	3	HVA22G	locus:2005699
AT1G77880	3	AT1G77880	locus:2029481
AT1G78420	3	AT1G78420	locus:2032110
AT1G79530	3	GAPCP-1	locus:2206435
AT2G07170	3	AT2G07170	locus:2060161
AT2G07599	3	AT2G07599	locus:6530298178
AT2G07721	3	AT2G07721	locus:2828196
AT2G07811	3	AT2G07811	locus:4515102811
AT2G12462	3	AT2G12462	locus:1009023213
AT2G13820	3	XYP2	locus:2043750
AT2G20362	3	AT2G20362	locus:4515102872
AT2G20800	3	NDB4	locus:2051431
AT2G22140	3	EME1B	locus:2055961
AT2G22610	3	AT2G22610	locus:2066030
AT2G22730	3	AT2G22730	locus:2066045
AT2G23560	3	MES7	locus:2046793
AT2G26267	3	0	0
AT2G27300	3	NTL8	locus:2039600
AT2G27930	3	AT2G27930	locus:2057867
AT2G31130	3	AT2G31130	locus:2055866
AT2G31550	3	AT2G31550	locus:2065898
AT2G32340	3	AT2G32340	locus:2062581
AT2G33620	3	AT2G33620	locus:2051038
AT2G34238	3	AT2G34238	locus:4515102947
AT2G34530	3	AT2G34530	locus:2062298
AT2G34920	3	EDA18	locus:2044752
AT2G35743	3	AT2G35743	locus:5019474735
AT2G40050	3	AT2G40050	locus:2061181
AT2G42820	3	HVA22F	locus:2052339
AT2G43980	3	ITPK4	locus:2051744
AT2G46890	3	AT2G46890	locus:2041359
AT3G02210	3	COBL1	locus:2076507
AT3G02640	3	AT3G02640	locus:2076849
AT3G03130	3	AT3G03130	locus:2097715
AT3G03640	3	BGLU25	locus:2096449
AT3G04850	3	AT3G04850	locus:2114825
AT3G05620	3	AT3G05620	locus:2078047
AT3G06420	3	ATG8H	locus:2081051
AT3G10680	3	AT3G10680	locus:2075805
AT3G16280	3	AT3G16280	locus:2094897
AT3G20580	3	COBL10	locus:2085785
AT3G20620	3	AT3G20620	locus:2085745
AT3G20630	3	UBP14	locus:2083440
AT3G23890	3	TOPII	locus:2076201
AT3G28455	3	CLE25	locus:504955760
AT3G29810	3	COBL2	locus:2086601
AT3G44150	3	AT3G44150	locus:2081413
AT3G45610	3	DOF6	locus:2085697
AT3G45820	3	AT3G45820	locus:2077202
AT3G47190	3	AT3G47190	locus:2075656
AT3G51280	3	AT3G51280	locus:2080858
AT3G51540	3	AT3G51540	locus:2081890
AT3G51670	3	AT3G51670	locus:2098282
AT3G52490	3	AT3G52490	locus:2079904
AT3G58380	3	AT3G58380	locus:2085405
AT3G59100	3	GSL11	locus:2077720
AT3G60220	3	ATL4	locus:2081907
AT4G01575	3	AT4G01575	locus:2831620
AT4G03100	3	AT4G03100	locus:2139330
AT4G09750	3	AT4G09750	locus:2118435
AT4G13992	3	AT4G13992	locus:4515103389
AT4G14150	3	PAKRP1	locus:2129455
AT4G14310	3	AT4G14310	locus:2129610
AT4G16015	3	AT4G16015	locus:1006230332
AT4G18550	3	DSEL	locus:2124529
AT4G18910	3	NIP1;2	locus:2117184
AT4G20910	3	HEN1	locus:2133114
AT4G21420	3	AT4G21420	locus:2141211
AT4G22940	3	AT4G22940	locus:2127188
AT4G26660	3	AT4G26660	locus:2133872
AT4G28430	3	AT4G28430	locus:2121417
AT4G28950	3	ROP9	locus:2123548
AT4G30520	3	SARK	locus:2118811
AT4G32830	3	AUR1	locus:2134103
AT4G35620	3	CYCB2;2	locus:2127948
AT4G37445	3	AT4G37445	locus:505006567
AT4G37750	3	ANT	locus:2137559
AT4G39810	3	AT4G39810	locus:2135302
AT5G11440	3	CID5	locus:2144221
AT5G11620	3	AT5G11620	locus:2181915
AT5G13840	3	FZR3	locus:2159078
AT5G14510	3	AT5G14510	locus:2145653
AT5G14890	3	AT5G14890	locus:2147780
AT5G17260	3	NAC086	locus:2167155
AT5G20540	3	BRXL4	locus:2149897
AT5G26190	3	AT5G26190	locus:2179759
AT5G38770	3	GDU7	locus:2166635
AT5G39471	3	AT5G39471	locus:4515103659
AT5G40140	3	AT5G40140	locus:2173742
AT5G40980	3	AT5G40980	locus:2163006
AT5G41470	3	AT5G41470	locus:2177906
AT5G43280	3	DCI1	locus:2169258
AT5G45520	3	AT5G45520	locus:2163593
AT5G45700	3	AT5G45700	locus:2171978
AT5G47510	3	AT5G47510	locus:2169038
AT5G49320	3	AT5G49320	locus:2155939
AT5G50090	3	AT5G50090	locus:2170116
AT5G50720	3	HVA22E	locus:2163290
AT5G52270	3	AT5G52270	locus:2145131
AT5G56120	3	AT5G56120	locus:2161830
AT5G61130	3	PDCB1	locus:2159436
AT5G65000	3	AT5G65000	locus:2177674
ATMG00690	3	ORF240A	locus:504954552
AT1G01730	3	AT1G01730	locus:2198145
AT1G01880	3	AT1G01880	locus:2025447
AT1G02690	3	IMPA-6	locus:2196140
AT1G04120	3	ABCC5	locus:2020235
AT1G04650	3	AT1G04650	locus:2197858
AT1G05610	3	APS2	locus:2032003
AT1G06660	3	JASON	locus:2009165
AT1G14860	3	NUDT18	locus:2006817
AT1G15570	3	CYCA2;3	locus:2196563
AT1G16070	3	TLP8	locus:2200497
AT1G16520	3	AT1G16520	locus:2017933
AT1G21810	3	AT1G21810	locus:2036977
AT1G25510	3	AT1G25510	locus:2031225
AT1G26540	3	AT1G26540	locus:2197985
AT1G34355	3	PS1	locus:505006169
AT1G35780	3	AT1G35780	locus:2011375
AT1G50240	3	FU	locus:2011927
AT1G53140	3	DRP5A	locus:2037026
AT1G54385	3	AT1G54385	locus:504956282
AT1G54960	3	NP2	locus:2010975
AT1G55850	3	CSLE1	locus:2012050
AT1G76540	3	CDKB2;1	locus:2011761
AT1G78660	3	GGH1	locus:2037583
AT1G80370	3	CYCA2;4	locus:2034250
AT2G07669	3	AT2G07669	locus:1009023191
AT2G17620	3	CYCB2;1	locus:2057243
AT2G20590	3	AT2G20590	locus:2046021
AT2G25270	3	AT2G25270	locus:2059567
AT2G25790	3	AT2G25790	locus:2043540
AT2G25880	3	AUR2	locus:2043485
AT2G26740	3	SEH	locus:2043868
AT2G31540	3	AT2G31540	locus:2065883
AT2G34070	3	TBL37	locus:2055425
AT2G35350	3	PLL1	locus:2062481
AT2G46920	3	POL	locus:2041444
AT2G47780	3	AT2G47780	locus:2043373
AT2G47860	3	SETH6	locus:2043388
AT3G01710	3	AT3G01710	locus:2082364
AT3G02120	3	AT3G02120	locus:2078708
AT3G06030	3	NP3	locus:2080394
AT3G06810	3	IBR3	locus:2083328
AT3G07410	3	RABA5b	locus:2079631
AT3G10310	3	AT3G10310	locus:2076289
AT3G10880	3	AT3G10880	locus:2103187
AT3G13650	3	AT3G13650	locus:2091521
AT3G18280	3	AT3G18280	locus:2089673
AT3G19050	3	POK2	locus:2085844
AT3G20150	3	AT3G20150	locus:2087650
AT3G20860	3	NEK5	locus:2091911
AT3G22810	3	AT3G22810	locus:2094414
AT3G23670	3	KINESIN-12B	locus:2088065
AT3G25980	3	MAD2	locus:2092125
AT3G44050	3	AT3G44050	locus:2097184
AT3G44310	3	NIT1	locus:2095690
AT3G51030	3	TRX1	locus:2080963
AT3G51230	3	AT3G51230	locus:2081003
AT3G54060	3	AT3G54060	locus:2080230
AT3G55660	3	ROPGEF6	locus:2078976
AT3G57060	3	AT3G57060	locus:2080620
AT3G62860	3	AT3G62860	locus:2081710
AT4G00460	3	ROPGEF3	locus:2126071
AT4G01410	3	AT4G01410	locus:2125157
AT4G03230	3	AT4G03230	locus:2125462
AT4G05190	3	ATK5	locus:2115713
AT4G13370	3	AT4G13370	locus:2142060
AT4G15830	3	AT4G15830	locus:2130814
AT4G17000	3	AT4G17000	locus:2130334
AT4G21820	3	AT4G21820	locus:2141657
AT4G30980	3	LRL2	locus:2126624
AT4G31840	3	ENODL15	locus:2116767
AT4G37490	3	CYCB1;1	locus:2126377
AT4G39630	3	AT4G39630	locus:2135202
AT5G01170	3	AT5G01170	locus:2150109
AT5G02140	3	AT5G02140	locus:2185218
AT5G03795	3	AT5G03795	locus:1009023450
AT5G04330	3	CYP84A4	locus:2179959
AT5G05160	3	RUL1	locus:2156784
AT5G05510	3	AT5G05510	locus:2169692
AT5G05940	3	ROPGEF5	locus:2153684
AT5G11510	3	MYB3R-4	locus:2144216
AT5G15510	3	AT5G15510	locus:2180897
AT5G16250	3	AT5G16250	locus:2181447
AT5G23830	3	AT5G23830	locus:2172788
AT5G23910	3	AT5G23910	locus:2172873
AT5G24310	3	ABIL3	locus:2169759
AT5G25090	3	ENODL13	locus:2179240
AT5G37010	3	AT5G37010	locus:2152637
AT5G38900	3	AT5G38900	locus:2152307
AT5G40960	3	AT5G40960	locus:2162981
AT5G48310	3	AT5G48310	locus:2156268
AT5G48480	3	AT5G48480	locus:2165996
AT5G50120	3	AT5G50120	locus:2170061
AT5G51350	3	MOL1	locus:2163665
AT5G55530	3	AT5G55530	locus:2173937
AT5G55820	3	WYR	locus:2162202
AT5G56580	3	MKK6	locus:2164981
AT5G60150	3	AT5G60150	locus:2143980
AT5G60930	3	AT5G60930	locus:2173537
AT5G61480	3	PXY	locus:2161158
AT5G62410	3	SMC2	locus:2167973
AT5G62500	3	EB1B	locus:2154149
AT5G62550	3	AT5G62550	locus:2154114
AT5G67270	3	EB1C	locus:2157177
AT1G32170	3	XTH30	locus:2031750
AT1G58030	3	CAT2	locus:2196245
AT2G33150	3	PKT3	locus:2046565
AT3G26590	3	AT3G26590	locus:2088822
AT3G28899	3	AT3G28899	locus:4515103154
AT5G54160	3	OMT1	locus:2153423
AT1G14070	3	0	0
AT1G33560	3	ADR1	locus:2006932
AT1G54575	3	AT1G54575	locus:1006230766
AT1G60730	3	AT1G60730	locus:2036515
AT1G62810	3	CuAO1	locus:2026267
AT1G64710	3	AT1G64710	locus:2010811
AT1G74020	3	SS2	locus:2031486
AT1G79410	3	OCT5	locus:2206430
AT2G22470	3	AGP2	locus:2041223
AT2G37040	3	PAL1	locus:2057981
AT2G37760	3	AKR4C8	locus:2040751
AT2G38920	3	AT2G38920	locus:2064935
AT3G01330	3	DEL3	locus:2100272
AT3G09430	3	AT3G09430	locus:2083609
AT3G10500	3	NAC053	locus:2075815
AT3G13432	3	AT3G13432	locus:4010713743
AT3G26220	3	CYP71B3	locus:2093546
AT3G26230	3	CYP71B24	locus:2093556
AT3G48690	3	CXE12	locus:2114450
AT4G18360	3	GOX3	locus:2124499
AT4G26890	3	MAPKKK16	locus:2116417
AT4G37295	3	AT4G37295	locus:505006566
AT5G05365	3	AT5G05365	locus:4010713945
AT5G17330	3	GAD	locus:2167240
AT5G40000	3	AT5G40000	locus:2178057
AT5G42010	3	AT5G42010	locus:2165700
AT5G46050	3	PTR3	locus:2161438
AT5G47560	3	TDT	locus:2168988
AT5G57480	3	AT5G57480	locus:2174502
AT5G66830	3	AT5G66830	locus:2174949
AT1G59730	3	TH7	locus:2025971
AT1G72770	3	HAB1	locus:2030230
AT1G78670	3	GGH3	locus:2037573
AT2G22680	3	WAVH1	locus:2065999
AT4G13235	3	EDA21	locus:505006441
AT4G20110	3	VSR7	locus:2119792
AT5G07760	3	AT5G07760	locus:2160299
AT5G57150	3	AT5G57150	locus:2175599
AT5G65510	3	AIL7	locus:2155680
AT1G06840	3	AT1G06840	locus:2033158
AT1G22360	3	UGT85A2	locus:2196501
AT1G23210	3	GH9B6	locus:2028015
AT1G24480	3	AT1G24480	locus:2023986
AT1G50630	3	AT1G50630	locus:2008046
AT1G66700	3	PXMT1	locus:2033409
AT1G68360	3	AT1G68360	locus:2199367
AT1G69920	3	GSTU12	locus:2196744
AT1G73050	3	AT1G73050	locus:2032642
AT2G07731	3	AT2G07731	locus:2828328
AT2G15760	3	AT2G15760	locus:2044631
AT2G18190	3	AT2G18190	locus:2053109
AT2G23300	3	AT2G23300	locus:2058598
AT2G26695	3	AT2G26695	locus:1006230021
AT2G29660	3	AT2G29660	locus:2060684
AT2G35980	3	YLS9	locus:2039185
AT2G37130	3	AT2G37130	locus:2061794
AT2G39050	3	EULS3	locus:2064965
AT2G43840	3	UGT74F1	locus:2044044
AT2G45930	3	AT2G45930	locus:2050745
AT2G47260	3	WRKY23	locus:2065124
AT3G01970	3	WRKY45	locus:2078703
AT3G10470	3	AT3G10470	locus:2075865
AT3G10986	3	AT3G10986	locus:4515103053
AT3G17790	3	PAP17	locus:2088590
AT3G22600	3	AT3G22600	locus:2077001
AT3G23240	3	ERF1	locus:2086223
AT3G27330	3	AT3G27330	locus:2086666
AT3G48850	3	PHT3;2	locus:2099413
AT3G48890	3	MAPR3	locus:2099453
[truncated: 7,756 more rows]
