# Supplementary material for: An auxin-mediated ultradian rhythm promotes root regeneration in Arabidopsis
Source: Research Square preprint supplement (doi:10.21203/rs.3.rs-604908/v1), 2021-06-25
Supplement: Supplementary file 7 [file 56f65561f286720920fc9758.xlsx]

## Sheet: Supplementary Table 1
Supplementary Table 1. Results of MetaCycle analysis of oscillating genes.
TAIR ID	meta2d pvalue	meta2d BH.Q	meta2d period	meta2d phase	meta2d Base	meta2d AMP	meta2d rAMP
AT4G25960	0.01	0.09	4.36	1	65.11	5.85	0.09
AT3G08860	0.02	0.13	4.36	0.86	19.59	3.59	0.18
AT3G15540	0.03	0.16	4.36	6.37	3.23	0.5	0.16
AT3G57670	0.03	0.18	4.36	7.83	1.24	0.27	0.22
AT1G30475	0.05	0.25	4.36	8.35	1.85	0.21	0.11
AT4G14020	0.05	0.24	4.36	7.77	170.75	16.37	0.1
AT5G03995	0.05	0.24	4.36	7.52	1.9	0.24	0.13
AT5G26940	0.01	0.05	4.36	8.31	16.01	1.53	0.1
AT4G30520	0.04	0.22	4.33	8.11	10.43	1.67	0.16
AT3G24480	0.01	0.09	4.33	0.14	81.44	11.17	0.14
AT2G47640	0.05	0.25	4.33	6.89	18.83	0.28	0.01
AT2G28740	0.02	0.1	4.33	6.19	14.53	1.2	0.08
AT1G75820	0.01	0.06	4.33	7.79	124.35	17.89	0.14
AT3G51670	0	0.01	4.33	7.76	63.7	4.73	0.07
AT5G57760	0.02	0.12	4.33	7.36	12.94	1.56	0.12
AT5G58660	0	0	4.33	7.28	1.88	0.36	0.19
AT1G01630	0.02	0.13	4.29	1.13	52.55	3.9	0.07
AT5G52560	0	0.02	4.29	1	26.17	2.31	0.09
AT5G35460	0.03	0.19	4.29	0.47	73.21	7.4	0.1
AT5G17980	0.02	0.13	4.29	7.63	10	2.48	0.25
AT5G05820	0.04	0.21	4.29	1.29	13.8	0.76	0.05
AT5G46170	0.01	0.06	4.29	0.46	21.08	0.78	0.04
AT1G24020	0	0.02	4.29	0.39	22.75	5.53	0.24
AT1G11670	0	0	4.29	0.25	7.81	1.98	0.25
AT1G27950	0	0.01	4.29	0.15	60.7	13.42	0.22
AT5G50130	0	0.04	4.29	6.27	3.89	0.4	0.1
AT3G58030	0	0.04	4.29	7.94	49.11	2.64	0.05
AT1G22030	0	0	4.29	7.32	3.04	0.78	0.26
AT5G47140	0	0.01	4.29	6.65	36.96	2.93	0.08
AT1G31460	0.04	0.19	4.29	7.97	5.54	0.56	0.1
AT1G29820	0	0.03	4.29	7.17	13.12	1.13	0.09
AT5G16240	0.04	0.22	4.29	7.18	9.85	0.77	0.08
AT3G06320	0.01	0.09	4.29	6.15	6.83	0.46	0.07
AT3G51250	0	0	4.29	8.58	30.58	2.51	0.08
AT5G15900	0.01	0.07	4.25	0.46	2	0.7	0.35
AT3G14780	0	0	4.25	6.97	3.89	0.79	0.2
AT3G17030	0	0.01	4.25	6.47	2.3	0.29	0.13
AT1G61040	0	0.01	4.25	6.27	26.7	1.4	0.05
AT5G51670	0	0.02	4.25	8.02	6.75	0.8	0.12
AT5G67020	0	0.03	4.25	7.88	2.8	0.3	0.11
AT4G00710	0	0.02	4.25	0.1	66.96	7.67	0.11
AT4G40060	0.01	0.08	4.22	7.57	149.93	21.43	0.14
AT1G80760	0	0	4.22	7.55	28.49	6.63	0.23
AT5G09990	0.04	0.22	4.22	7.32	6.33	0.46	0.07
AT1G45180	0	0	4.19	7.94	10.32	1.14	0.11
AT3G05675	0.03	0.15	4.19	7.33	7.72	0.56	0.07
AT2G01570	0	0.03	4.19	8.05	130.46	14.24	0.11
AT5G08835	0.02	0.12	4.15	8.08	1.51	0.3	0.2
AT5G40140	0	0.02	4.15	7.93	11.88	1.47	0.12
AT2G31230	0.01	0.06	4.15	8.13	30.68	2.28	0.07
AT2G37460	0.01	0.1	4.12	0.07	45.15	6.99	0.15
AT1G75880	0.01	0.06	4.11	6.07	3.54	0.36	0.1
AT5G26800	0	0.03	4.11	6.01	13.71	0.84	0.06
AT2G33310	0.01	0.09	4.11	6.33	25.4	1.53	0.06
AT5G63990	0	0	4.11	6.79	6.72	0.78	0.12
AT4G09900	0.01	0.07	4.11	0.09	45.47	5.87	0.13
AT1G74670	0.04	0.22	4.08	6.58	18.71	1.61	0.09
AT3G55350	0.02	0.14	4.08	0.12	5.91	0.46	0.08
AT5G23100	0	0.01	4.08	0.08	13.83	1.97	0.14
AT4G10770	0	0.02	4.08	0.35	54.55	9	0.16
AT4G14130	0.02	0.11	4.08	7.09	10.82	2.4	0.22
AT1G02160	0.02	0.14	4.08	7.09	12.67	0.17	0.01
AT5G42300	0	0.03	4.08	6.33	161.32	7.41	0.05
AT5G50335	0	0.02	4.08	6.32	1.55	0.53	0.35
AT1G32190	0	0	4.08	7.63	7.98	1.5	0.19
AT4G00780	0.01	0.07	4.04	6.33	385.55	26.37	0.07
AT1G65985	0.04	0.2	4.04	0.18	4.39	0.67	0.15
AT5G53870	0	0.01	4.04	1.25	17.25	3.47	0.2
AT1G72130	0.03	0.16	4.04	1.25	42.59	4.6	0.11
AT3G48720	0.01	0.05	4.04	0.71	41.87	4.51	0.11
AT5G61340	0	0.03	4.04	0.66	9.93	1.61	0.16
AT2G18350	0	0.01	4.04	7.56	7.11	0.86	0.12
AT2G30000	0.03	0.19	4.04	6.41	7.33	0.34	0.05
AT2G18050	0.03	0.19	4.04	6.04	55.53	10.01	0.18
AT2G25720	0.05	0.24	4.04	8.05	8.06	0.41	0.05
AT4G22250	0.04	0.21	4.04	7.71	2.65	0.44	0.17
AT5G12050	0.02	0.13	4.04	7.17	79.92	7.65	0.1
AT2G02230	0	0.01	4.04	7.02	7	0.54	0.08
AT1G15270	0.01	0.09	4.04	6.46	130.87	5.94	0.05
AT3G47965	0.01	0.08	4.04	6.41	5.45	0.42	0.08
AT3G58990	0.01	0.05	4.04	0.15	57.94	9.99	0.17
AT2G26430	0.01	0.09	4	5.91	51.77	2.47	0.05
AT5G37720	0.01	0.09	4	5.78	34.28	1.99	0.06
AT5G59020	0.03	0.15	4	1.5	3.04	0.45	0.15
AT4G12310	0.04	0.2	4	1.5	45.17	4.54	0.1
AT1G29660	0	0.02	4	1.5	112.46	18.75	0.17
AT2G14050	0	0	4	1.47	6.13	0.61	0.1
AT3G28070	0.05	0.25	4	1.25	31.21	5.69	0.18
AT5G36160	0	0.02	4	0.98	95.1	7.75	0.08
AT2G35760	0	0.01	4	0.77	21.77	3.41	0.16
AT5G65010	0.01	0.05	4	0.73	101.49	23.09	0.23
AT5G03760	0.03	0.15	4	0.7	90.75	21.58	0.24
AT5G58130	0.03	0.18	4	7.82	23.9	0.64	0.03
AT5G15580	0	0	4	7.64	5.41	0.72	0.13
AT2G31010	0.02	0.12	4	7.49	6.28	0.99	0.16
AT3G61630	0.02	0.14	4	7.49	19.51	0.9	0.05
AT5G09630	0	0	4	6.79	4.19	0.36	0.09
AT4G03190	0	0.01	4	6.64	8.1	1.16	0.14
AT1G19610	0.01	0.04	4	6.36	13.2	2.35	0.18
AT2G35795	0	0	4	6.03	16.09	1.04	0.06
AT1G73630	0	0.02	4	7.28	18.07	4.85	0.27
AT1G22065	0	0.02	4	6.77	2.02	0.47	0.23
AT1G55610	0.02	0.14	4	6.65	11.24	1.11	0.1
AT5G66850	0	0	4	1.79	32.8	2.77	0.08
AT4G14465	0	0	4	7.96	2.53	0.79	0.31
AT1G54200	0	0	4	7.39	5.28	1.04	0.2
AT5G61520	0	0.01	4	7.99	104.37	5.79	0.06
AT5G57685	0	0.01	4	7.7	9.77	1.36	0.14
AT3G12770	0	0.02	4	7.52	1.79	0.28	0.16
AT1G36940	0.03	0.19	4	7.49	3.17	0.31	0.1
AT1G21520	0.01	0.09	4	6.82	12.96	1.35	0.1
AT1G69410	0.01	0.05	4	6.82	182.55	10.19	0.06
AT2G46330	0	0.02	3.97	6.08	101.02	8.42	0.08
AT2G34690	0.01	0.08	3.97	6.04	101.1	4.94	0.05
AT1G74458	0	0.01	3.97	5.91	1.68	0.31	0.19
AT1G67730	0.02	0.12	3.97	0.53	53.17	6.31	0.12
AT5G42840	0.03	0.15	3.97	0.52	1.82	0.44	0.24
AT1G53300	0.01	0.04	3.97	0.51	28.83	4.23	0.15
AT5G57610	0.02	0.1	3.97	0.49	44.79	3.61	0.08
AT3G18290	0	0	3.97	1.81	114.74	25.33	0.22
AT1G05540	0.02	0.12	3.97	1.5	10.28	1.55	0.15
AT1G28570	0	0.02	3.97	1.5	23.86	4.1	0.17
AT3G21190	0	0.03	3.97	1.25	19.35	3.58	0.18
AT3G01120	0	0.02	3.97	1.25	275.65	42.5	0.15
AT3G52370	0.02	0.11	3.97	1.25	19.89	7.22	0.36
AT4G24010	0.04	0.21	3.97	1.25	2.03	0.6	0.29
AT4G12730	0.01	0.07	3.97	1.24	54.85	10.38	0.19
AT4G09180	0.01	0.1	3.97	0.93	9.97	0.93	0.09
AT2G38010	0	0	3.97	0.92	23.59	3.9	0.17
AT5G48020	0.03	0.17	3.97	0.86	49.92	2.84	0.06
AT2G35860	0.02	0.15	3.97	0.8	79.47	17.13	0.22
AT1G05230	0.01	0.08	3.97	0.57	23.4	2.34	0.1
AT2G47000	0.02	0.1	3.97	7.81	24.65	1.53	0.06
AT4G39400	0.01	0.09	3.97	7.59	185.05	15.93	0.09
AT1G11210	0	0	3.97	7.57	45.31	11.44	0.25
AT1G20696	0.01	0.06	3.97	7.57	112.23	8.91	0.08
AT1G20693	0.02	0.11	3.97	7.57	250.47	26.59	0.11
AT1G13740	0	0.03	3.97	7.11	2.36	0.42	0.18
AT1G09250	0	0.02	3.97	6.38	13.4	2.14	0.16
AT4G36010	0	0	3.97	0.12	4.92	1.8	0.37
AT4G21310	0.04	0.23	3.97	7.67	3.33	0.5	0.15
AT5G39340	0	0	3.97	7.39	35.65	5.02	0.14
AT2G28510	0	0.01	3.97	6.95	8.38	1.76	0.21
AT1G31880	0	0.01	3.97	6.93	3.2	0.75	0.23
AT5G08510	0	0.01	3.97	6.85	6.55	0.73	0.11
AT1G33060	0	0.01	3.97	6.68	18.44	1.09	0.06
AT5G03650	0.01	0.04	3.97	1.24	162.27	12.31	0.08
AT3G25400	0	0	3.97	7.9	4.43	0.77	0.17
AT1G49470	0.01	0.07	3.97	7.65	46.13	5.02	0.11
AT5G05480	0	0.03	3.97	7.65	20.53	2.72	0.13
AT3G26960	0	0	3.97	7.6	2.91	0.73	0.25
AT5G46720	0.01	0.07	3.97	6.92	2.11	0.32	0.15
AT5G04950	0	0	3.97	0.07	2.57	0.83	0.32
AT1G04180	0	0.01	3.97	7.81	1.94	0.64	0.33
AT3G29310	0	0	3.97	7.79	17.38	1.3	0.07
AT2G18790	0	0	3.97	7.78	94.05	13.22	0.14
AT5G28040	0.04	0.19	3.97	7.78	26.36	1.14	0.04
AT5G35732	0	0	3.97	7.75	7.96	1.53	0.19
AT1G12320	0.03	0.18	3.97	7.75	2.74	0.21	0.08
AT2G10940	0	0	3.97	7.73	192.17	69.65	0.36
AT5G28030	0.03	0.18	3.97	7.57	11.21	0.77	0.07
AT1G76090	0.01	0.04	3.97	7.57	18.82	1.83	0.1
AT3G63030	0.01	0.09	3.97	7.57	14.66	0.81	0.06
AT5G60840	0	0	3.97	7.55	21.81	2.83	0.13
AT1G69010	0	0.01	3.97	7.55	32.41	2.93	0.09
AT3G08660	0	0	3.97	7.52	3.13	0.57	0.18
AT1G26218	0.02	0.15	3.97	6.43	1.12	0.12	0.11
AT3G55740	0.05	0.25	3.97	0.12	34.02	3.11	0.09
AT3G10960	0.02	0.14	3.97	0.31	9.15	0.8	0.09
AT5G18070	0.01	0.06	3.97	0.1	7.41	0.76	0.1
AT4G21110	0.01	0.09	3.94	5.69	35.09	2.59	0.07
AT1G66250	0.02	0.1	3.94	0.54	9.4	1.5	0.16
AT3G06550	0	0	3.94	1.87	70.22	11.65	0.17
AT3G07330	0	0	3.94	1.76	33.92	2.2	0.06
AT1G49620	0	0.02	3.94	1.49	1.42	0.21	0.15
AT4G22130	0	0.01	3.94	1.49	14.47	1.78	0.12
AT2G33570	0.03	0.18	3.94	1.49	18.29	3.52	0.19
AT1G12500	0.02	0.13	3.94	1.49	19.13	1.93	0.1
AT4G27720	0	0.02	3.94	1.49	24.38	3.5	0.14
AT5G49810	0.01	0.04	3.94	1.49	90.09	5.36	0.06
AT3G61130	0.05	0.24	3.94	1.32	62.29	5.27	0.08
AT3G56590	0.01	0.08	3.94	1.25	52.13	5.16	0.1
AT2G46535	0.04	0.2	3.94	1.25	7.5	1.16	0.16
AT5G05250	0.02	0.11	3.94	1.25	17.15	5.86	0.34
AT3G03770	0.01	0.08	3.94	1.25	28.32	5.72	0.2
AT4G10430	0.01	0.07	3.94	1.25	29.05	2.42	0.08
AT3G23810	0.04	0.2	3.94	1.25	129.28	35.32	0.27
AT5G09870	0.01	0.04	3.94	1.25	142.76	34.23	0.24
AT1G32900	0.03	0.16	3.94	1.25	396.51	124.93	0.32
AT5G61240	0	0.01	3.94	1.09	39.99	4.83	0.12
AT2G28250	0.02	0.11	3.94	0.62	5.26	0.84	0.16
AT5G13400	0.01	0.1	3.94	0.6	24.78	5.34	0.22
AT4G36930	0.05	0.24	3.94	7.79	2.23	0.28	0.13
AT5G54470	0	0.01	3.94	7.64	4.38	0.61	0.14
AT3G11850	0.04	0.2	3.94	7.64	9.85	0.28	0.03
AT1G18390	0.03	0.16	3.94	7.64	19.99	1.2	0.06
AT4G03400	0.01	0.09	3.94	7.64	31.96	1.94	0.06
AT4G33985	0	0.01	3.94	6.8	1.93	0.41	0.21
AT4G19120	0	0.01	3.94	0.26	50.02	14.41	0.29
AT1G02460	0	0.01	3.94	0.02	2.66	0.66	0.25
AT5G48150	0	0	3.94	7.66	95.89	11.09	0.12
AT5G44910	0.01	0.09	3.94	7.58	5.77	1.1	0.19
AT5G58620	0	0	3.94	7.01	29.12	3.41	0.12
AT1G66830	0.01	0.05	3.94	6.79	8.76	1.64	0.19
AT4G15070	0	0	3.94	6.71	3.5	0.69	0.2
AT5G50150	0	0.01	3.94	6.7	24.23	2.86	0.12
AT4G14580	0	0	3.94	6.63	10.34	3.79	0.37
AT1G74660	0	0	3.94	6.61	1.25	0.37	0.29
AT1G79430	0.05	0.24	3.94	6.53	33.72	3.33	0.1
AT2G31200	0.02	0.11	3.94	6.13	49.27	2.96	0.06
AT3G53730	0	0	3.94	6.01	34.88	5.75	0.16
AT5G19470	0.03	0.18	3.94	1.95	25.06	6.37	0.25
AT2G29510	0.01	0.07	3.94	1.49	42.16	2.01	0.05
AT5G50900	0.02	0.14	3.94	7.75	24.07	1.81	0.08
AT5G23280	0	0.01	3.94	0.15	71.38	8.77	0.12
AT3G27220	0	0.01	3.94	0.08	6.49	0.48	0.07
AT1G14780	0.01	0.05	3.94	0.08	6.65	1	0.15
AT1G70560	0.02	0.13	3.94	7.82	19.31	1.88	0.1
AT2G02060	0	0.01	3.94	7.77	16.25	2.21	0.14
AT2G41370	0	0	3.94	7.75	3.33	0.55	0.16
AT3G10910	0	0	3.94	7.65	1.99	0.49	0.24
AT3G23150	0.02	0.13	3.94	7.64	15.78	1.61	0.1
AT4G16860	0	0.01	3.94	7.64	68.85	7.27	0.11
AT3G51430	0.04	0.23	3.94	7.64	123.36	7.08	0.06
AT3G50340	0	0	3.94	7.6	21.68	6.13	0.28
AT4G00238	0.01	0.06	3.94	7.59	13.99	0.64	0.05
AT5G59910	0	0.03	3.94	7.41	147.98	16.35	0.11
AT4G09160	0	0.01	3.94	7.4	5.06	0.79	0.16
AT5G56240	0	0.03	3.94	7.09	58.35	3.92	0.07
AT3G28850	0.04	0.22	3.94	6.68	5.61	0.37	0.07
AT2G20515	0	0.03	3.94	0.26	1.3	0.27	0.21
AT2G36090	0.01	0.05	3.94	0.26	1.31	0.3	0.23
AT5G64330	0.02	0.1	3.94	0.26	53.35	6.14	0.12
AT1G54130	0.01	0.07	3.94	0.26	183.17	20.42	0.11
AT2G26640	0	0.01	3.94	0.25	21.76	3	0.14
AT1G05420	0	0	3.94	0.16	1.3	0.43	0.33
AT5G65640	0.03	0.17	3.94	0.16	7.26	1.55	0.21
AT2G22490	0.02	0.12	3.94	0.14	21	0.95	0.05
AT1G56020	0	0	3.94	0.14	5.07	1.06	0.21
AT1G51170	0	0.01	3.94	0.12	11.96	1.63	0.14
AT4G30630	0	0.03	3.94	0.02	17.84	1.56	0.09
AT2G46620	0.01	0.04	3.94	0.02	23.89	2.27	0.09
AT1G20510	0.02	0.12	3.94	0.02	108.01	10.08	0.09
AT1G20980	0.01	0.07	3.94	0.02	135.77	6.71	0.05
AT4G38620	0.03	0.18	3.9	1	13.18	1.72	0.13
AT4G02680	0	0	3.9	0.67	51.28	3.44	0.07
AT4G39050	0	0.04	3.9	1.95	52.31	3.74	0.07
AT1G62710	0.02	0.11	3.9	1.85	9.83	2.82	0.29
AT1G51140	0.02	0.13	3.9	1.49	26.08	6.12	0.23
AT4G21910	0	0.01	3.9	1.16	88.35	13.5	0.15
AT5G40830	0	0	3.9	1.12	13.27	1.99	0.15
AT1G08960	0	0.04	3.9	1.09	9.86	0.94	0.1
AT2G19310	0.05	0.25	3.9	1.08	70.61	8.69	0.12
AT5G10480	0.01	0.04	3.9	0.97	26.86	2.61	0.1
AT5G06390	0.02	0.12	3.9	0.91	45.34	5.14	0.11
AT4G13990	0.01	0.06	3.9	0.91	6.09	1.32	0.22
AT1G76670	0.01	0.05	3.9	0.72	161.94	23.45	0.14
AT3G02250	0	0.01	3.9	0.66	27.52	6.14	0.22
AT5G50160	0	0	3.9	6.48	80.94	8.87	0.11
AT3G58570	0.04	0.21	3.9	0.15	28.51	2.59	0.09
AT3G05220	0.01	0.05	3.9	0.15	89.41	10.74	0.12
AT2G01630	0	0	3.9	7.46	13.78	2.21	0.16
AT1G32860	0.01	0.04	3.9	7	6.6	1.58	0.24
AT3G46030	0	0	3.9	6.77	66.98	8.65	0.13
AT4G23750	0	0.01	3.9	6.7	3.9	0.96	0.25
AT5G19020	0.01	0.06	3.9	6.66	2.71	0.31	0.11
AT3G30841	0	0	3.9	6.61	12.31	1.37	0.11
AT5G39865	0.05	0.24	3.9	6.57	1.01	0.19	0.18
AT2G05320	0	0.02	3.9	6.54	17.55	1.25	0.07
AT5G53290	0	0	3.9	6.48	1.06	0.42	0.4
AT4G22930	0	0.03	3.9	2.37	28.1	1.45	0.05
AT4G30110	0.01	0.05	3.9	7.74	25.65	3.87	0.15
AT5G16230	0.03	0.18	3.9	7.58	3.84	0.44	0.12
AT2G48090	0	0.03	3.9	7.56	2.61	0.6	0.23
AT2G34490	0	0	3.9	0.45	36.21	7.9	0.22
AT3G52890	0	0	3.9	0.21	17.88	1.7	0.1
AT1G52880	0	0	3.9	0.2	20.58	3.01	0.15
AT5G49630	0.02	0.1	3.9	0.16	29.36	5.23	0.18
AT2G35700	0	0	3.9	0.16	6.09	2.17	0.36
AT4G35930	0	0	3.9	0.14	4.84	0.77	0.16
AT2G39890	0	0	3.9	0.13	37.39	5.94	0.16
AT2G26290	0	0.03	3.9	0.13	1.34	0.33	0.25
AT3G20830	0	0.01	3.9	0.08	8.3	1.37	0.16
AT5G02480	0	0	3.9	0	167.11	16.73	0.1
AT5G27220	0	0.02	3.9	7.81	1.93	0.22	0.11
AT3G47530	0.01	0.06	3.9	7.8	4.77	0.4	0.08
AT4G28230	0	0	3.9	7.79	10.18	1.67	0.16
AT2G26440	0	0.01	3.9	7.79	75.07	15.72	0.21
AT1G56600	0	0.02	3.9	7.77	37.04	8.14	0.22
AT5G02580	0	0	3.9	7.77	18.54	8.81	0.48
AT1G14920	0	0	3.9	7.76	79.49	12.8	0.16
AT4G32290	0	0	3.9	7.72	31.43	4.17	0.13
AT1G06180	0.03	0.15	3.9	7.71	8.59	0.23	0.03
AT5G14230	0.01	0.05	3.9	7.67	1.61	0.24	0.15
AT2G46970	0	0	3.9	7.64	7.24	2.56	0.35
AT2G34650	0	0	3.9	7.62	8.12	2.2	0.27
AT4G27230	0.01	0.07	3.9	7.62	43.41	6.04	0.14
AT3G58620	0	0.03	3.9	7.58	21.1	2.05	0.1
AT2G02080	0	0	3.9	7.57	69.4	7.06	0.1
AT4G18880	0.01	0.04	3.9	7.56	29.54	2.21	0.07
AT5G53030	0	0	3.9	7.55	6.84	1.09	0.16
AT1G01260	0	0	3.9	7.55	18.55	1.94	0.1
AT2G20500	0	0.01	3.9	7.54	5	0.87	0.17
AT4G16780	0	0	3.9	7.53	73.92	21.33	0.29
AT1G34370	0	0	3.9	7.53	65.54	6.62	0.1
AT1G11000	0	0.01	3.9	6.92	2.13	0.71	0.33
AT4G25434	0	0	3.9	6.9	1.88	0.38	0.2
AT1G17500	0.05	0.24	3.9	6.73	37.81	2.31	0.06
AT1G18150	0.01	0.05	3.9	0.4	40.03	4.98	0.12
AT3G10520	0	0	3.9	0.4	70.42	16.03	0.23
AT1G44810	0.04	0.23	3.9	0.27	30.2	1.81	0.06
AT3G08640	0	0	3.9	0.25	132.23	22.23	0.17
AT3G15040	0.04	0.22	3.9	0.15	14.09	0.85	0.06
AT2G25250	0	0.02	3.9	0.15	37.34	4.26	0.11
AT3G08670	0.02	0.14	3.9	0.15	39.2	2.89	0.07
AT1G22070	0	0	3.9	0.15	47.69	9.62	0.2
AT2G21380	0	0.01	3.9	0.15	48.94	8.48	0.17
AT4G15490	0	0.02	3.9	0.02	18.66	4.97	0.27
AT1G31750	0.02	0.11	3.9	0.24	1.04	0.2	0.19
AT1G25682	0.05	0.24	3.87	6.07	26.6	1.17	0.04
AT4G29660	0.03	0.18	3.87	6.06	6.59	0.42	0.06
AT5G58550	0	0	3.87	0.42	12.29	1.96	0.16
AT2G24570	0.01	0.09	3.87	6.86	11.18	2.89	0.26
AT1G68600	0	0	3.87	1.98	154.31	41.74	0.27
AT5G37310	0	0	3.87	1.68	39.73	3.64	0.09
AT5G17790	0	0	3.87	1.62	22.03	1.45	0.07
AT4G33030	0	0.02	3.87	1.49	89.03	6.83	0.08
AT4G36250	0	0.02	3.87	1.44	63.09	8.19	0.13
AT2G43710	0.01	0.07	3.87	1.24	274.38	28.69	0.1
AT3G52290	0.01	0.09	3.87	1.24	6.97	1.06	0.15
AT2G21860	0	0	3.87	1.22	25.85	2.41	0.09
AT1G22160	0	0.03	3.87	1.21	93.55	15.57	0.17
AT4G02100	0	0.01	3.87	1.05	6.96	0.85	0.12
AT3G18440	0	0.03	3.87	0.29	24.47	2.04	0.08
AT4G33920	0.03	0.19	3.87	0.04	26.05	0.69	0.03
AT3G05490	0	0	3.87	7.64	17.74	4.14	0.23
AT1G01580	0	0	3.87	7.31	3.22	0.8	0.25
AT2G24440	0.04	0.23	3.87	7.28	1.4	0.2	0.14
AT3G50660	0	0.03	3.87	7.1	9.16	1.12	0.12
AT1G23150	0	0	3.87	6.99	4.75	1.13	0.24
AT5G62680	0	0.01	3.87	6.7	94.77	10.96	0.12
AT4G40040	0.02	0.11	3.87	6.62	268.97	21.94	0.08
AT3G63110	0	0	3.87	6.61	15.45	5.09	0.33
AT1G17490	0	0.02	3.87	6.57	12.24	1.14	0.09
AT3G12920	0.03	0.19	3.87	6.52	30.97	3.45	0.11
AT4G30410	0	0.01	3.87	6.34	1.79	0.43	0.24
AT3G13190	0.01	0.04	3.87	6.31	5.72	0.5	0.09
AT3G55730	0	0	3.87	7.69	6.2	0.91	0.15
AT5G58530	0	0.01	3.87	7.54	4.38	0.7	0.16
AT2G41440	0.03	0.15	3.87	7.4	2.9	0.26	0.09
AT3G05330	0.03	0.18	3.87	7.2	2.24	0.35	0.16
AT5G47780	0	0	3.87	0.33	118.93	7.42	0.06
AT5G10370	0.04	0.23	3.87	0.31	30.31	1.8	0.06
AT2G45310	0	0	3.87	0.26	5.38	1.51	0.28
AT1G75300	0	0	3.87	0.25	4.76	1.53	0.32
AT4G04745	0	0	3.87	0.23	1.07	0.31	0.29
AT3G45650	0	0	3.87	0.19	13.32	3.64	0.27
AT4G09420	0	0	3.87	7.63	7.36	1.43	0.19
AT2G18600	0.01	0.1	3.87	7.57	3.2	0.34	0.11
AT3G50010	0	0.04	3.87	0.53	1.44	0.32	0.22
AT5G39760	0	0	3.87	0.53	16.98	2.73	0.16
AT5G49880	0.04	0.21	3.87	0.53	22.81	0.88	0.04
AT1G07240	0.02	0.11	3.87	0.53	34.76	3.91	0.11
AT3G15095	0	0	3.87	0.34	55.21	6.95	0.13
AT3G56060	0	0	3.87	0.33	76.54	13.3	0.17
AT2G33050	0	0	3.87	0.31	60.96	9.94	0.16
AT1G75500	0	0	3.87	0.31	284.01	28.93	0.1
AT4G01550	0.01	0.05	3.87	0.29	14.19	1.81	0.13
AT4G30360	0	0	3.87	0.29	21.13	2.04	0.1
AT1G14370	0.02	0.11	3.87	0.29	31.69	1.86	0.06
AT1G22530	0.01	0.06	3.87	0.29	92.96	11.59	0.12
AT2G42200	0	0.01	3.87	0.27	2.13	0.5	0.23
AT5G12190	0.01	0.06	3.87	0.24	20.25	1.32	0.07
AT4G23010	0.02	0.1	3.87	0.1	85.73	11.33	0.13
AT2G20960	0	0.01	3.87	0.09	144.28	11.25	0.08
AT4G30710	0	0	3.87	0.07	21.76	3.85	0.18
AT3G12915	0	0.02	3.87	0.05	9.87	0.84	0.09
AT5G61000	0	0	3.87	0.04	6.39	0.72	0.11
AT1G10410	0	0	3.87	0.04	35.01	4.38	0.13
AT5G08130	0	0	3.87	0.03	42.16	9.13	0.22
AT4G31450	0	0.01	3.87	0.03	26.86	2.58	0.1
AT3G60520	0	0	3.87	0.02	6.97	1.29	0.19
AT2G22430	0	0	3.87	0.01	639.03	155.98	0.24
AT1G04240	0	0	3.87	0.01	25.77	5.52	0.21
AT5G65310	0	0	3.87	0.01	49.72	13.97	0.28
AT1G07090	0	0	3.87	0.01	58.84	11.19	0.19
AT5G42500	0	0	3.87	0.56	1.12	0.34	0.31
AT5G51740	0	0	3.87	0.26	12.16	1.14	0.09
AT2G30700	0.04	0.2	3.84	1	34.08	1.95	0.06
AT4G11450	0	0.01	3.84	0.84	4.09	0.42	0.1
AT5G24990	0	0	3.84	0.82	1.36	0.39	0.29
AT4G10390	0	0	3.84	0.8	1.52	0.35	0.23
AT4G09920	0.04	0.23	3.84	0.79	1.64	0.29	0.18
AT4G18030	0	0	3.84	1.97	112.13	14.63	0.13
AT2G40280	0.01	0.07	3.84	2.06	28.86	2.42	0.08
AT2G19860	0	0	3.84	1.52	59.89	10.87	0.18
AT1G55360	0.03	0.19	3.84	1.07	121.36	11.85	0.1
AT4G04890	0	0.01	3.84	0.81	94.8	16.54	0.17
AT1G25250	0.01	0.07	3.84	0.66	1.73	0.37	0.21
AT5G20480	0	0.02	3.84	7.56	10.94	1.69	0.15
AT3G03440	0.01	0.07	3.84	7.48	6.48	0.98	0.15
AT1G20070	0	0	3.84	7.4	2.75	0.57	0.21
AT1G13430	0.01	0.06	3.84	7.37	1.12	0.3	0.27
AT4G36550	0	0	3.84	7.02	16.05	1.73	0.11
AT3G47540	0	0.03	3.84	6.96	8.99	1.42	0.16
AT2G01990	0	0	3.84	6.93	9.58	2.28	0.24
AT1G21270	0.01	0.05	3.84	6.91	212.47	50.04	0.24
AT2G35710	0.01	0.06	3.84	6.55	1.35	0.28	0.21
AT2G28590	0.03	0.18	3.84	6.13	2.45	0.31	0.13
AT1G71960	0	0	3.84	7.68	34.81	8.57	0.25
AT1G29860	0	0.02	3.84	7.66	3.14	0.9	0.29
AT1G76360	0	0	3.84	0.39	48.38	6.33	0.13
AT1G79720	0.01	0.04	3.84	0.29	40.08	4.69	0.12
AT4G34050	0	0.01	3.84	0.29	310.81	39.23	0.13
AT3G61640	0	0	3.84	0.29	6.49	0.96	0.15
AT3G57120	0.01	0.06	3.84	0.28	7.36	1	0.14
AT5G60450	0	0	3.84	0.28	38.75	5.33	0.14
AT2G22080	0	0.01	3.84	0.26	36.56	3.72	0.1
AT5G50800	0	0	3.84	0.25	11.97	4.4	0.37
AT1G23030	0	0	3.84	0.25	21.29	4.2	0.2
AT2G40070	0	0	3.84	0.22	30.86	4.41	0.14
AT4G16750	0	0.01	3.84	0.2	7.68	2.57	0.33
AT5G16600	0	0.03	3.84	0.1	1.68	0.39	0.23
AT3G19540	0.03	0.19	3.84	0.03	22.73	2.2	0.1
AT1G73040	0	0.01	3.84	0.01	27.57	3.16	0.11
AT1G69680	0	0	3.84	7.64	6.77	0.87	0.13
AT1G29400	0.02	0.11	3.84	7.61	235.31	12.9	0.05
AT4G13918	0.01	0.05	3.84	7.59	4.59	0.45	0.1
AT1G55920	0	0	3.84	7.56	71.67	6.06	0.08
AT3G07600	0.02	0.14	3.84	7.56	1.23	0.18	0.15
AT4G02060	0.03	0.16	3.84	6.76	8.17	0.97	0.12
AT1G08650	0.01	0.08	3.84	0.66	20.79	3.58	0.17
AT3G57540	0.01	0.05	3.84	0.66	7.64	0.95	0.12
AT4G25320	0	0	3.84	0.66	14.11	1.28	0.09
AT1G61730	0	0.02	3.84	0.66	25.97	1.99	0.08
AT3G10480	0	0.02	3.84	0.66	29.31	2.42	0.08
AT1G69870	0	0	3.84	0.66	139.83	27.18	0.19
AT1G11910	0	0	3.84	0.38	1170.01	122.07	0.1
AT1G67510	0	0	3.84	0.38	15.47	3.56	0.23
AT1G31120	0	0	3.84	0.37	11.55	1.65	0.14
AT2G45315	0	0.01	3.84	0.36	10.62	1.25	0.12
AT5G10750	0	0.02	3.84	0.35	17.66	2.45	0.14
AT3G25870	0	0	3.84	0.34	9.91	2.23	0.23
AT3G52710	0	0	3.84	0.33	48.42	17.1	0.35
AT4G39940	0	0	3.84	0.33	177.11	24.02	0.14
AT3G13160	0.01	0.07	3.84	0.27	8.81	0.77	0.09
AT3G19240	0	0.01	3.84	0.18	34.72	1.52	0.04
AT1G04730	0.01	0.09	3.84	0.16	2.61	0.13	0.05
AT3G12280	0.04	0.19	3.84	0.15	48.62	2.1	0.04
AT1G12760	0	0.01	3.84	0.14	67.17	4.2	0.06
AT4G39390	0	0.02	3.84	0.14	12.18	0.79	0.06
AT3G55070	0	0.01	3.84	0.13	32.16	1.77	0.05
AT3G46620	0	0.02	3.84	0.12	13.61	1.22	0.09
AT5G28300	0	0.02	3.84	0.11	56.04	8.88	0.16
AT5G43170	0.04	0.21	3.84	0.11	5.62	0.59	0.1
AT2G20830	0.01	0.08	3.84	0.11	30.96	1.07	0.03
AT1G61360	0.02	0.13	3.84	0.1	33.84	3.06	0.09
AT1G07280	0	0	3.84	0.07	262.19	65.89	0.25
AT3G01400	0	0	3.84	0.36	26.96	2.43	0.09
AT1G56430	0.05	0.24	3.83	0.34	1.77	0.61	0.35
AT1G23730	0.04	0.21	3.81	6.07	6.71	0.59	0.09
AT3G60240	0.02	0.12	3.81	1.24	137.46	9.11	0.07
AT5G03670	0.03	0.16	3.81	0.9	3.76	0.66	0.18
AT1G64440	0.01	0.06	3.81	0.84	13.1	1.28	0.1
AT2G28890	0	0	3.81	7.39	36.24	7.29	0.2
AT1G46264	0.01	0.05	3.81	6.79	4.88	1.23	0.25
AT2G22125	0	0.04	3.81	2.06	142.8	15.73	0.11
AT2G04280	0	0.04	3.81	1.29	56.47	5.4	0.1
AT3G25500	0.01	0.06	3.81	1.24	48.13	5.7	0.12
AT3G16060	0	0.04	3.81	1.24	49.51	5.12	0.1
AT1G52630	0.02	0.12	3.81	1.21	6.58	0.42	0.06
AT5G64740	0	0.02	3.81	1.12	267.71	30.6	0.11
AT2G07690	0.02	0.13	3.81	6.85	7.76	0.74	0.1
AT4G03210	0	0	3.81	7.61	94.57	41.15	0.44
AT1G16510	0	0.01	3.81	7.54	13.63	3.46	0.25
AT5G16760	0	0	3.81	7.27	48.81	5.34	0.11
AT5G05365	0	0	3.81	6.99	13.7	5.59	0.41
AT2G02010	0	0	3.81	6.94	39.9	10.49	0.26
AT4G02750	0.01	0.05	3.81	6.68	1.78	0.24	0.14
AT3G49570	0	0	3.81	6.53	2.14	0.81	0.38
AT4G35985	0.01	0.06	3.81	0.08	5.88	0.58	0.1
AT1G69850	0	0	3.81	0.03	81.49	9.28	0.11
AT2G17370	0.01	0.09	3.81	7.63	8.11	0.85	0.1
AT5G66820	0	0	3.81	7.61	29.55	6.73	0.23
AT4G15800	0.02	0.12	3.81	7.59	38.82	7.23	0.19
AT2G39180	0	0	3.81	0.64	12.69	2.45	0.19
AT3G61760	0.02	0.11	3.81	0.41	1.67	0.26	0.16
AT4G09500	0	0	3.81	0.4	16.84	5.44	0.32
AT1G60505	0.01	0.05	3.81	0.4	16.38	1.07	0.07
AT5G17000	0	0	3.81	0.4	24.43	4.27	0.17
AT4G21750	0	0.01	3.81	0.37	59.81	10.17	0.17
AT1G66940	0	0	3.81	0.36	35.25	6.46	0.18
AT1G51580	0	0	3.81	0.36	25.96	3.36	0.13
AT2G41900	0	0	3.81	0.36	172.84	22.77	0.13
AT1G75400	0	0	3.81	0.35	36.03	3.16	0.09
AT2G29980	0.01	0.05	3.81	0.34	42.39	5.56	0.13
AT2G37570	0	0	3.81	0.33	43.75	6.35	0.15
AT3G44735	0.03	0.15	3.81	0.33	9.39	1.38	0.15
AT1G59730	0	0	3.81	0.29	1.93	1.09	0.57
AT3G19380	0	0	3.81	0.11	17.19	4.26	0.25
AT1G07370	0.03	0.16	3.81	7.46	4.77	0.51	0.11
AT1G53760	0.05	0.24	3.81	6.9	11.59	0.55	0.05
AT2G16440	0.02	0.14	3.81	6.72	6.5	0.73	0.11
AT1G55265	0.01	0.06	3.81	0.79	55.58	6.84	0.12
AT5G53000	0	0.01	3.81	0.55	27.76	1.16	0.04
AT2G43200	0	0	3.81	0.54	10.62	1.48	0.14
AT1G77850	0	0.01	3.81	0.5	18.11	1.78	0.1
AT1G21380	0	0	3.81	0.49	72.72	7.54	0.1
AT5G04940	0	0	3.81	0.44	11.78	1.34	0.11
AT4G18820	0	0	3.81	0.4	26.98	1.91	0.07
AT1G78210	0	0.01	3.81	0.38	12.08	2.83	0.23
AT4G16670	0	0.02	3.81	0.21	21.8	3.49	0.16
AT5G40300	0	0	3.81	0.16	15.22	0.88	0.06
AT4G02820	0.01	0.09	3.81	0.16	9.06	0.45	0.05
AT3G54810	0	0	3.81	0.16	54.87	11.58	0.21
AT2G35880	0	0	3.81	0.16	38.19	7.98	0.21
AT3G44450	0	0	3.81	0.11	5.67	2.11	0.37
AT3G12620	0	0.02	3.81	0.44	32.56	1.93	0.06
AT5G23360	0	0.01	3.79	0.92	1.41	0.36	0.26
AT5G26220	0	0	3.79	7.12	1.58	1.16	0.73
AT3G55360	0	0	3.79	0.91	43.26	5.7	0.13
AT5G50820	0	0	3.79	7.5	1.08	0.51	0.47
AT2G01150	0	0	3.79	7.37	9.47	3.39	0.36
AT1G59660	0	0	3.79	7.36	10.07	1.76	0.18
AT4G28310	0	0.01	3.79	6.98	2.61	0.43	0.17
AT3G14740	0.05	0.24	3.79	6.58	1.4	0.3	0.21
AT1G07630	0	0.01	3.79	0.12	40.39	5.67	0.14
AT5G01720	0	0	3.79	0.11	61.33	7.94	0.13
AT4G27900	0	0	3.79	0.45	108.52	29.39	0.27
AT5G58900	0	0	3.79	0.44	28.02	5.56	0.2
AT3G08630	0	0.02	3.79	0.44	15.54	2.24	0.14
AT3G01470	0	0	3.79	0.44	205.65	34.29	0.17
AT3G15820	0	0	3.79	0.43	22.77	3.44	0.15
AT1G52700	0	0	3.79	0.43	1.14	0.48	0.42
AT3G16860	0	0	3.79	0.43	11.22	3.62	0.32
AT5G20190	0	0	3.79	0.42	437.44	158.2	0.36
AT5G11970	0	0	3.79	0.42	28.11	5.46	0.19
AT5G07580	0	0	3.79	0.41	74.39	13	0.17
AT4G17680	0	0	3.79	0.4	4.14	1.66	0.4
AT1G61255	0	0	3.79	0.4	4.03	1.44	0.36
AT1G21390	0	0.02	3.79	0.38	6.24	0.72	0.12
AT5G18370	0.02	0.12	3.79	0.2	19.65	1.29	0.07
AT5G53750	0.01	0.09	3.79	7.41	15.39	1.29	0.08
AT1G44900	0	0.01	3.79	7.11	8.99	1.24	0.14
AT1G34360	0.05	0.24	3.79	1.15	8.76	0.43	0.05
AT3G50350	0	0	3.79	0.91	5.77	0.72	0.12
AT3G60320	0.05	0.25	3.79	0.91	108.56	6.61	0.06
AT4G34740	0.05	0.24	3.79	0.67	21.98	1.09	0.05
AT3G62150	0	0.03	3.79	0.61	56.94	2.81	0.05
AT5G44180	0	0.01	3.79	0.51	49.53	3.83	0.08
AT5G08020	0	0.01	3.79	0.29	2.65	0.21	0.08
AT1G74100	0	0.03	3.79	0.28	161.22	14.37	0.09
AT3G17250	0	0.02	3.79	0.04	10.38	0.43	0.04
AT3G52610	0.05	0.25	3.79	0.7	23.21	1.69	0.07
AT1G44960	0.02	0.13	3.79	0.54	12.47	0.89	0.07
AT2G15820	0	0	3.76	0.96	21.26	2.38	0.11
AT3G49720	0.01	0.07	3.76	1.21	63.48	5.62	0.09
AT3G50900	0	0	3.76	7.27	5.98	1.26	0.21
AT5G53570	0	0.01	3.76	6.54	34.92	2.52	0.07
AT1G18590	0	0	3.76	0.21	58.86	7.15	0.12
AT4G36380	0.01	0.08	3.76	0.76	5.24	0.99	0.19
AT3G20120	0	0	3.76	0.55	24.37	2.18	0.09
AT2G14750	0	0	3.76	0.53	137.72	15.3	0.11
AT3G50070	0.01	0.06	3.76	0.5	3.26	0.45	0.14
AT1G64900	0	0	3.76	0.46	152.74	37.73	0.25
AT5G11730	0.03	0.18	3.76	0.45	20.97	1.52	0.07
AT3G51950	0	0	3.76	0.44	140.04	22.44	0.16
AT5G46790	0	0	3.76	0.43	20.79	4.65	0.22
AT3G50410	0	0.02	3.76	0.4	1.39	0.25	0.18
AT3G63010	0	0	3.76	0.27	21.61	2.5	0.12
AT3G04020	0.02	0.14	3.76	0.17	4.99	0.56	0.11
AT2G39480	0	0	3.76	1.04	41.85	3.08	0.07
AT5G44635	0.01	0.09	3.76	0.8	4.64	0.21	0.05
AT1G56140	0.02	0.13	3.76	0.8	31.16	1.25	0.04
AT3G08720	0.01	0.08	3.76	0.8	18.21	0.32	0.02
AT5G20010	0	0	3.76	0.54	329.93	49.48	0.15
AT4G10960	0	0.01	3.76	0.54	7.89	1.66	0.21
AT5G02630	0.02	0.1	3.76	0.29	12.67	0.73	0.06
AT4G36990	0.02	0.12	3.76	0.29	57.6	4.69	0.08
AT4G17430	0	0	3.76	0.58	11.62	1.53	0.13
AT4G33220	0	0	3.76	0.57	68.86	18.52	0.27
AT4G24130	0.01	0.09	3.75	1.27	4.03	0.76	0.19
AT5G05970	0	0	3.73	1.04	12.97	1.35	0.1
AT1G76880	0	0.03	3.73	1.02	33.61	2.35	0.07
AT4G15240	0	0	3.73	0.58	19.07	2.07	0.11
AT3G61550	0	0	3.73	0.55	15.04	5.13	0.34
AT5G05380	0.05	0.25	3.73	0.24	4.21	0.67	0.16
AT2G37940	0	0.04	3.73	1.16	69.75	5.69	0.08
AT1G27970	0.04	0.22	3.73	1.16	80.84	3.57	0.04
AT3G55270	0.03	0.16	3.73	0.98	62.03	1.9	0.03
AT5G53480	0	0.01	3.73	0.88	127.01	6.74	0.05
AT1G04220	0	0	3.71	0.85	12.71	7.17	0.56
AT1G76520	0.01	0.06	3.71	1.05	83.58	3.27	0.04
AT1G67940	0.02	0.11	3.71	0.63	11.77	1.17	0.1
AT4G01080	0.01	0.09	3.69	1.53	20.93	10.63	0.51
AT3G54220	0.01	0.07	3.69	0.84	33.5	2.81	0.08
AT5G15450	0.02	0.1	3.69	1.53	157.8	33.77	0.21
AT5G07590	0	0	3.69	1.2	5.4	0.93	0.17
AT1G64190	0.01	0.06	3.69	1.03	42.55	2.98	0.07
AT3G17120	0	0.01	3.68	0.9	20.76	6.79	0.33
AT1G14590	0.01	0.1	3.66	1.2	8.77	0.71	0.08
AT2G05810	0	0	3.65	1.52	6.35	1.55	0.24
AT3G23170	0.04	0.22	3.65	6.6	9.39	1.77	0.19
AT3G19680	0.01	0.06	3.65	6.42	71.7	9.74	0.14
AT1G51090	0.02	0.1	3.65	1.15	6.6	3.25	0.49
AT5G64572	0.01	0.06	3.65	6.3	4.73	1.28	0.27
AT1G06760	0	0.02	3.65	6.3	174.31	40.59	0.23
AT2G30620	0	0.03	3.65	6.27	134.52	20.15	0.15
AT3G57430	0.02	0.1	3.65	0.11	4.89	0.55	0.11
AT1G65010	0	0.02	3.63	1.2	43.28	7.32	0.17
AT2G40730	0	0.01	3.62	2.42	56.08	4.11	0.07
AT5G59160	0.02	0.14	3.62	2.02	53.71	3.5	0.07
AT4G30980	0.02	0.14	3.62	0.51	4.8	1.22	0.26
AT4G16563	0	0	3.62	0.79	22.59	10.76	0.48
AT1G78070	0	0	3.62	0.51	69.03	26.72	0.39
AT1G13360	0.01	0.08	3.62	6.84	123.27	18.75	0.15
AT5G54640	0.01	0.07	3.62	6.26	19.16	2.94	0.15
AT1G01830	0.04	0.21	3.62	0.26	40.48	3.1	0.08
AT5G55550	0	0	3.62	1.05	15.98	2.31	0.14
AT5G02850	0.04	0.21	3.62	1.24	16.21	1.35	0.08
AT1G28670	0	0	3.61	1.3	51.25	7.17	0.14
AT5G01790	0.02	0.13	3.61	1.3	17.28	4.97	0.29
AT3G28130	0.01	0.1	3.61	1.72	22.73	4.4	0.19
AT4G12910	0	0	3.61	1.35	31.57	4.81	0.15
AT3G63290	0.03	0.18	3.61	1.14	3.82	0.33	0.09
AT2G46890	0.01	0.08	3.59	0.61	4	0.55	0.14
AT3G02350	0	0.03	3.59	1.39	58.19	4.27	0.07
AT1G76580	0.04	0.22	3.59	0.87	36.15	2.63	0.07
AT5G67300	0	0.02	3.59	7.17	179.53	29.44	0.16
AT5G64900	0.01	0.08	3.59	7.1	2.97	0.56	0.19
AT3G20640	0	0	3.59	6.94	3.82	1.13	0.3
AT5G15080	0	0.01	3.59	6.87	22.95	1.7	0.07
AT4G35240	0	0.02	3.59	6.57	20.95	1.5	0.07
AT4G21380	0.04	0.22	3.59	6.47	46.07	10.83	0.24
AT4G28490	0.02	0.11	3.59	6.34	72.3	14.77	0.2
AT2G44910	0.03	0.17	3.59	0.35	1.34	0.35	0.26
AT5G07620	0	0	3.59	1.11	3.59	0.6	0.17
AT3G04110	0	0.01	3.59	0.86	30.56	3.71	0.12
AT3G54200	0	0	3.59	0.78	14.51	3.51	0.24
AT1G29950	0	0	3.59	0.77	56.39	7.04	0.12
AT4G00820	0	0	3.59	0.51	8.45	2.88	0.34
AT2G03500	0	0	3.59	0.29	9.52	1.79	0.19
AT4G33960	0	0	3.59	1.38	5.87	1.45	0.25
AT5G61810	0	0	3.59	1.13	13.68	3.33	0.24
AT3G05660	0	0	3.59	0.52	25.82	12.32	0.48
AT2G17230	0	0	3.59	0.5	35.47	12.91	0.36
AT4G27840	0	0.01	3.59	1.1	14.69	2.6	0.18
AT5G66650	0.03	0.16	3.59	7.16	3.48	0.25	0.07
AT4G33080	0.04	0.22	3.59	1.37	33.44	3.66	0.11
AT1G12550	0.01	0.08	3.59	1.34	6.64	1.01	0.15
AT1G64670	0.05	0.25	3.59	1.31	10.56	1.85	0.18
AT3G09710	0	0	3.59	1.71	7.48	1.54	0.21
AT4G31590	0.01	0.09	3.59	1.01	31.73	6.01	0.19
AT4G31920	0.02	0.1	3.57	1.5	27.71	2.47	0.09
AT3G62650	0	0.03	3.56	5.85	127.87	16.79	0.13
AT1G56710	0.03	0.15	3.56	0.54	2.57	0.79	0.31
AT5G45650	0	0	3.56	2.3	72.32	15.7	0.22
AT5G11110	0	0	3.56	1.51	21.31	3.41	0.16
AT2G18630	0.03	0.15	3.56	1.47	14.65	1.76	0.12
AT3G43600	0	0.01	3.56	1.41	25.63	3.33	0.13
AT3G16180	0	0.02	3.56	1.5	13.25	3.07	0.23
AT1G12710	0	0	3.56	0.92	11.07	3.83	0.35
AT1G64760	0	0	3.56	0.88	6.18	2.42	0.39
AT5G16530	0.05	0.24	3.56	7.04	11.63	1.96	0.17
AT1G70090	0.01	0.06	3.56	6.83	21.51	2.77	0.13
AT2G38640	0	0	3.56	6.79	20.77	8.63	0.42
AT3G12750	0	0	3.56	6.65	16.63	3.61	0.22
AT3G17160	0	0.01	3.56	6.53	9.88	1.18	0.12
AT1G07640	0	0.01	3.56	6.52	49.39	8.45	0.17
AT5G39330	0	0.04	3.56	0.63	1.33	0.34	0.25
AT4G31550	0	0	3.56	0.57	39.53	8.75	0.22
AT2G47160	0	0	3.56	0.56	22.66	3.21	0.14
AT1G10120	0	0	3.56	0.55	13	2.58	0.2
AT1G53700	0	0	3.56	0.49	7.42	1.73	0.23
AT1G07790	0	0.01	3.56	0.16	15.48	2.43	0.16
AT1G14600	0	0	3.56	0.11	9.22	1.51	0.16
AT1G17430	0.01	0.07	3.56	0.01	10.98	2.06	0.19
AT5G65860	0	0.01	3.56	1.14	8.63	1.3	0.15
AT5G12100	0	0	3.56	1.11	6.53	0.69	0.11
AT3G28200	0	0	3.56	0.84	23.3	4.3	0.18
AT1G76350	0	0	3.56	0.83	22.48	3.4	0.15
AT3G12730	0.01	0.05	3.56	0.83	22.19	1.93	0.09
AT5G10410	0.01	0.04	3.56	0.8	4.1	0.88	0.21
AT1G74090	0	0.01	3.56	0.8	80.67	12.42	0.15
AT2G41170	0	0	3.56	0.79	3.39	0.78	0.23
AT5G21105	0	0	3.56	0.78	67.27	10.62	0.16
AT4G24960	0	0.02	3.56	0.74	19.8	2.71	0.14
AT5G48800	0	0	3.56	0.66	9.27	1.13	0.12
AT5G45400	0	0	3.56	0.63	2.97	0.45	0.15
AT5G53060	0	0	3.56	0.58	11.59	1.32	0.11
AT3G16870	0	0	3.56	0.57	8.46	2.98	0.35
AT1G06850	0	0	3.56	0.56	5.76	0.89	0.15
AT4G29310	0.04	0.2	3.56	0.56	14.34	1.64	0.11
AT1G31790	0	0.02	3.56	0.49	2.27	0.32	0.14
AT1G76955	0.02	0.15	3.56	1.5	6.98	0.91	0.13
AT4G18390	0	0.02	3.56	1.5	28.71	4.39	0.15
AT2G37320	0.01	0.07	3.56	0.88	2.48	0.31	0.12
AT2G22190	0	0	3.56	0.87	17.49	4.5	0.26
AT2G31870	0	0.02	3.56	0.68	6.7	0.71	0.11
AT1G30090	0	0.03	3.56	0.65	26.53	1.1	0.04
AT3G46290	0	0	3.56	0.62	44.36	6.6	0.15
AT2G46310	0	0	3.56	0.54	4.29	1.2	0.28
AT5G47060	0	0	3.56	0.53	11.19	5.16	0.46
AT3G47820	0	0.02	3.56	1.22	20.58	3.72	0.18
AT1G29170	0	0.02	3.54	1.43	20.58	5.43	0.26
AT1G80130	0	0.03	3.54	1.34	445	78.79	0.18
AT4G39600	0.01	0.07	3.54	5.54	2.39	0.26	0.11
AT5G15050	0	0.01	3.54	1.18	14.65	1.58	0.11
AT5G53890	0.01	0.08	3.54	6.51	17.38	1.81	0.1
AT4G38520	0	0	3.54	0.81	104.39	13.75	0.13
AT5G01170	0	0.01	3.54	0.75	3.85	0.96	0.25
AT2G23950	0	0	3.54	0.49	62.67	14.66	0.23
AT5G48500	0.01	0.06	3.54	0.45	10.06	1.23	0.12
AT1G75080	0.01	0.06	3.54	0.24	34.97	3.91	0.11
AT2G19580	0.02	0.13	3.54	1.76	5.96	0.82	0.14
AT3G03250	0	0	3.54	1.69	187.96	32.79	0.17
AT3G25110	0	0	3.54	1.56	4.07	0.85	0.21
AT1G66920	0.01	0.09	3.54	6.66	36.86	4.38	0.12
AT3G58720	0	0	3.54	6.6	15.64	2.31	0.15
AT1G06475	0	0	3.54	6.59	5.72	3.54	0.62
AT5G66631	0	0.02	3.54	6.58	1.76	0.24	0.14
AT1G72800	0	0.01	3.54	6.55	16.92	4.81	0.28
AT2G20562	0.04	0.22	3.54	6.51	2.34	0.78	0.33
AT2G29065	0.02	0.12	3.54	6.5	4.16	0.5	0.12
AT5G25440	0.03	0.16	3.54	6.29	22.98	2.71	0.12
AT5G53590	0.03	0.16	3.54	6.26	8.67	1.73	0.2
AT5G10650	0	0.04	3.54	0.61	42.75	5.95	0.14
AT5G66730	0	0.01	3.54	0.59	68.59	6.42	0.09
AT4G30935	0	0	3.54	0.58	17.85	1.37	0.08
AT3G23730	0	0.02	3.54	0.54	3.22	0.84	0.26
AT5G20150	0	0	3.54	0.49	13.82	3.97	0.29
AT2G47440	0	0	3.54	0.4	78.34	19.97	0.25
AT2G18328	0	0	3.54	0.35	30.48	7.46	0.24
AT1G46480	0	0	3.54	0.21	3.51	1.23	0.35
AT4G21800	0.04	0.2	3.54	0.15	43.94	2.37	0.05
AT5G63110	0	0	3.54	1.15	27.68	1.86	0.07
AT1G50270	0	0.02	3.54	1.05	2.43	0.28	0.12
AT5G41410	0	0	3.54	0.93	61.14	12.33	0.2
AT2G37580	0	0	3.54	0.93	3.3	1.73	0.52
AT5G11740	0	0	3.54	0.92	171.79	63.25	0.37
AT4G17570	0	0	3.54	0.9	43.59	4.81	0.11
AT1G66350	0	0	3.54	0.9	17.22	6.14	0.36
AT4G19230	0	0	3.54	0.88	7.4	2.18	0.29
AT5G44160	0	0	3.54	0.86	3.62	1.12	0.31
AT5G52510	0	0	3.54	0.85	46.44	12.68	0.27
AT2G40130	0	0	3.54	0.85	4.51	1.96	0.43
AT4G30350	0	0	3.54	0.82	17.22	4.34	0.25
AT4G01440	0	0	3.54	0.81	2.47	0.64	0.26
AT5G64870	0	0.01	3.54	0.64	5.19	1.16	0.22
AT5G46690	0	0	3.54	0.62	23.32	6.2	0.27
AT5G24030	0	0	3.54	0.62	8.49	1.9	0.22
AT1G35780	0	0	3.54	0.61	17.53	1.96	0.11
AT2G38310	0	0	3.54	0.54	51.54	13.77	0.27
AT4G28630	0	0	3.54	0.51	16.29	1.93	0.12
AT1G62610	0	0	3.54	1.36	17.85	2.3	0.13
AT3G13530	0.02	0.14	3.54	1.36	48.7	2.03	0.04
AT4G30240	0	0.01	3.54	0.94	14.16	2.1	0.15
AT1G80670	0	0	3.54	0.72	27.7	2.19	0.08
AT2G01940	0	0.02	3.54	0.69	3.21	0.41	0.13
AT1G50570	0	0.04	3.54	0.68	68.34	3.78	0.06
AT1G06780	0	0	3.54	0.68	15.08	1.93	0.13
AT3G46940	0	0	3.54	0.6	6	1.07	0.18
AT1G57590	0	0	3.54	1.23	3.23	1.1	0.34
AT5G51350	0.01	0.07	3.51	1.5	12.61	1.28	0.1
AT4G36240	0	0.02	3.51	1.2	8.66	3.19	0.37
AT4G00740	0	0.01	3.51	2.45	54.65	5.14	0.09
AT3G54780	0	0	3.51	6.94	4.03	0.81	0.2
AT4G36710	0	0.01	3.51	6.77	11.16	3.85	0.34
AT4G35940	0.01	0.05	3.51	6.71	9.1	0.79	0.09
AT1G16060	0.05	0.24	3.51	0.99	3.6	0.41	0.11
AT1G13970	0	0	3.51	0.91	2.05	0.82	0.4
AT2G41890	0	0	3.51	0.88	15.85	2.75	0.17
AT5G04840	0	0	3.51	0.86	2.63	0.76	0.29
AT4G18630	0	0	3.51	0.82	5.47	1.48	0.27
AT3G49220	0	0	3.51	0.82	86.54	22.14	0.26
AT1G03840	0	0	3.51	0.81	1.32	1.06	0.8
AT5G60890	0	0	3.51	0.79	14.18	4.76	0.34
AT3G62690	0	0	3.51	0.78	15.78	7.31	0.46
AT1G51440	0	0	3.51	0.77	4.19	1.1	0.26
AT3G08600	0.01	0.05	3.51	0.75	10.03	2.37	0.24
AT4G32295	0.05	0.25	3.51	0.61	6.11	0.92	0.15
AT2G17260	0	0	3.51	0.45	3.74	1.13	0.3
AT3G50890	0	0	3.51	0.4	1.38	0.46	0.33
AT3G55370	0	0	3.51	0.33	2.68	0.72	0.27
AT3G61380	0	0	3.51	0.28	16.85	6.36	0.38
AT3G23630	0	0	3.51	0.03	6.9	1.89	0.27
AT3G14570	0	0	3.51	0	13.34	3.85	0.29
AT5G42860	0	0.02	3.51	1.5	4.73	1.02	0.22
AT1G27340	0	0	3.51	1.48	50.27	4.58	0.09
AT5G46520	0	0.02	3.51	1.22	6.28	0.56	0.09
AT5G53486	0	0	3.51	6.96	2.14	0.58	0.27
AT1G77570	0.01	0.06	3.51	6.95	1.9	0.29	0.15
AT5G42146	0	0	3.51	6.94	6.05	1.74	0.29
AT3G62570	0	0	3.51	6.83	1.81	0.74	0.41
AT2G18090	0	0.03	3.51	6.81	43.75	4.33	0.1
AT3G28910	0	0	3.51	6.69	6.68	0.74	0.11
AT1G02705	0	0	3.51	6.61	7.92	3.68	0.47
AT4G09030	0	0	3.51	6.56	32.36	11.04	0.34
AT1G50460	0.01	0.05	3.51	6.55	16.29	2.28	0.14
AT4G04810	0.02	0.12	3.51	6.41	3.89	0.72	0.19
AT3G57700	0	0.01	3.51	6.28	6.58	1.59	0.24
AT1G20780	0.01	0.06	3.51	6.27	33.28	4.53	0.14
AT1G03100	0	0	3.51	0.51	2.54	0.4	0.16
AT1G64060	0	0	3.51	0.33	11.71	2.22	0.19
AT5G50890	0	0	3.51	0.33	7.49	1.91	0.25
AT5G43380	0	0	3.51	0.27	17.61	4.98	0.28
AT3G05430	0	0.02	3.51	0.03	3.39	0.58	0.17
AT2G22500	0	0.02	3.51	0.01	26.13	6.63	0.25
AT5G60790	0	0	3.51	1.24	121.46	12.65	0.1
AT1G78100	0	0	3.51	1.21	38.22	7.94	0.21
AT2G38940	0.01	0.06	3.51	1.2	19.99	4.85	0.24
AT5G17760	0	0	3.51	1.08	22.83	4.43	0.19
AT5G24320	0.01	0.09	3.51	1.01	29.53	1.78	0.06
AT5G33290	0	0	3.51	1.01	65.81	18.79	0.29
AT3G06740	0	0	3.51	1	5.24	1.16	0.22
AT3G14200	0	0	3.51	1	21.4	8.67	0.41
AT1G08760	0	0	3.51	0.99	22.99	1.91	0.08
AT4G38050	0	0	3.51	0.99	4.24	1.22	0.29
AT3G46990	0	0	3.51	0.98	3.44	0.5	0.14
AT2G23180	0.05	0.24	3.51	0.98	12.04	1.72	0.14
AT3G22380	0	0	3.51	0.98	339.61	39.64	0.12
AT3G44820	0	0	3.51	0.98	15.82	4.54	0.29
AT2G46370	0	0	3.51	0.97	98.79	28.61	0.29
AT3G57070	0	0	3.51	0.95	21.25	4.33	0.2
AT1G69440	0	0	3.51	0.95	18.49	5.18	0.28
AT1G75840	0	0	3.51	0.95	23.95	2.12	0.09
AT5G56270	0	0	3.51	0.94	32.75	10.91	0.33
AT4G15080	0	0	3.51	0.94	22.51	3.74	0.17
AT2G40230	0	0	3.51	0.94	2.8	0.89	0.32
AT5G48560	0	0	3.51	0.93	2.5	0.63	0.25
AT5G21482	0	0	3.51	0.93	37.51	8.14	0.22
AT1G42990	0.01	0.04	3.51	0.89	47.71	4.75	0.1
AT4G02130	0	0	3.51	0.88	45.08	14.11	0.31
AT1G73880	0	0.01	3.51	0.86	6.19	1.17	0.19
AT5G56310	0	0.03	3.51	0.81	1.92	0.27	0.14
AT4G31360	0	0.02	3.51	0.76	3.46	0.59	0.17
AT4G27820	0	0	3.51	0.7	13.88	3.42	0.25
AT5G13310	0.01	0.07	3.51	0.68	11.37	0.81	0.07
AT3G23440	0	0	3.51	0.67	4.45	0.92	0.21
AT3G05630	0.03	0.17	3.51	1.72	3.26	0.24	0.08
AT5G09450	0	0	3.51	1.72	12.66	1.32	0.1
AT2G16660	0.01	0.09	3.51	1.72	12.9	1.05	0.08
AT1G70810	0	0.03	3.51	1.72	44.29	4.86	0.11
AT4G36945	0	0	3.51	1.47	12.09	2.01	0.17
AT4G29440	0.03	0.16	3.51	1.47	16.66	0.76	0.05
AT1G03350	0.05	0.25	3.51	1.22	47.18	2.69	0.06
AT2G40550	0.04	0.2	3.51	1.04	7.66	0.61	0.08
AT5G66320	0	0.02	3.51	1.03	31.75	3.65	0.12
AT3G19010	0.02	0.14	3.51	0.76	110.06	7.79	0.07
AT1G33230	0	0	3.51	1.72	27.51	3.64	0.13
AT5G63980	0.01	0.05	3.51	1.36	81.34	5.93	0.07
AT4G28600	0	0.01	3.51	1.3	36.33	2.4	0.07
AT5G15680	0	0.01	3.51	1.2	61.15	3.66	0.06
AT5G58440	0.02	0.14	3.51	1	36.46	2	0.05
AT1G58340	0	0.01	3.5	0.47	3.16	0.11	0.03
AT1G37130	0.02	0.11	3.5	1.61	465.68	160.16	0.34
AT4G21550	0	0.03	3.48	1.83	4.72	0.8	0.17
AT1G51100	0.02	0.14	3.48	1.25	9.66	0.78	0.08
AT4G03070	0	0.01	3.48	1.02	9.49	2.39	0.25
AT1G16750	0	0	3.48	0.97	20.02	5.06	0.25
AT1G19440	0	0	3.48	0.91	13.94	3.17	0.23
AT3G56430	0	0.01	3.48	2.72	15.99	1.04	0.07
AT5G24660	0	0	3.48	6.95	15.84	8.06	0.51
AT5G01710	0	0	3.48	0.95	82.16	13.9	0.17
AT2G30070	0	0	3.48	0.9	32.92	5.05	0.15
AT4G27520	0	0.01	3.48	0.88	109.37	30.76	0.28
AT2G17150	0	0	3.48	0.87	14.89	2.38	0.16
AT2G28080	0	0	3.48	0.86	15.69	3.8	0.24
AT1G30040	0	0	3.48	0.85	1.93	1.02	0.53
AT2G46630	0	0	3.48	0.83	26.77	11.03	0.41
AT3G61590	0	0	3.48	0.78	5.88	0.88	0.15
AT3G26810	0	0	3.48	0.76	70.73	11.36	0.16
AT5G37770	0	0.02	3.48	0.69	11.62	2.33	0.2
AT1G76130	0	0	3.48	0.64	73.77	12.77	0.17
AT3G02950	0.04	0.22	3.48	0.63	12.91	0.83	0.06
AT2G41820	0	0	3.48	0.62	14.01	3.38	0.24
AT3G24050	0	0.02	3.48	0.45	53.65	9.73	0.18
AT3G45830	0.02	0.1	3.48	0.31	31.26	3.72	0.12
AT2G45340	0	0.03	3.48	0.11	24.23	5.24	0.22
AT5G49020	0	0.02	3.48	1.55	18.19	1.27	0.07
AT4G34950	0	0	3.48	1.3	39.72	27.77	0.7
AT1G49230	0	0	3.48	1	8.34	2.46	0.3
AT2G34380	0	0.03	3.48	6.88	7.43	0.54	0.07
AT4G24120	0.04	0.19	3.48	6.81	85.22	13.04	0.15
AT3G05650	0	0	3.48	6.71	13.3	3.72	0.28
AT4G18010	0.01	0.04	3.48	6.65	39.24	7.05	0.18
AT4G37295	0	0	3.48	6.61	2.34	1.56	0.67
AT4G10970	0.02	0.1	3.48	6.61	24.8	2.55	0.1
AT3G49580	0.04	0.22	3.48	6.57	2.71	0.94	0.35
AT5G13060	0.04	0.22	3.48	6.49	2.32	0.4	0.17
AT3G51970	0	0.01	3.48	0.82	1.6	0.29	0.18
AT3G53000	0.01	0.05	3.48	0.76	7.54	0.72	0.1
AT4G23240	0	0.01	3.48	0.73	3.15	0.55	0.18
AT1G61380	0	0	3.48	0.68	57.64	13.01	0.23
AT4G31540	0	0	3.48	0.66	19.82	2.33	0.12
AT3G24550	0.05	0.25	3.48	0.64	81.22	7.31	0.09
AT2G30020	0	0	3.48	0.6	8.32	2.12	0.26
AT3G18485	0	0.01	3.48	0.46	1.87	0.39	0.21
AT3G61520	0	0.02	3.48	0.05	4.67	0.57	0.12
AT3G54000	0	0	3.48	6.71	2.77	0.46	0.17
AT2G24640	0.01	0.07	3.48	1.35	15.75	0.96	0.06
AT1G80290	0.01	0.07	3.48	1.31	12.16	1.32	0.11
AT1G01300	0	0	3.48	1.3	59.05	21.29	0.36
AT4G33950	0.04	0.22	3.48	1.29	15.47	1.56	0.1
AT2G47850	0	0	3.48	1.25	22.57	2.97	0.13
AT1G63530	0.01	0.05	3.48	1.25	3.57	0.63	0.18
AT1G73240	0.03	0.17	3.48	1.22	13.61	0.93	0.07
AT5G49160	0	0	3.48	1.14	19.08	2.22	0.12
AT5G38220	0.01	0.09	3.48	1.08	11.96	1.27	0.11
AT5G38730	0.01	0.07	3.48	1.08	2.1	0.24	0.11
AT2G38660	0.01	0.07	3.48	1.06	10.98	0.84	0.08
AT2G19130	0	0	3.48	1.06	41.55	7.03	0.17
AT5G46760	0	0	3.48	1.05	98.28	8.35	0.08
AT1G63750	0	0.03	3.48	1.05	18.42	2.47	0.13
AT4G34860	0	0	3.48	1.05	21.18	8.54	0.4
AT3G15890	0.03	0.19	3.48	1.04	7.05	0.75	0.11
AT5G23850	0	0	3.48	1.04	27.25	4.62	0.17
AT4G35510	0	0.01	3.48	1.02	11.88	1.19	0.1
AT4G20880	0	0	3.48	1.02	15.9	3.29	0.21
AT3G49670	0	0	3.48	1.02	34.96	11.36	0.32
AT2G32930	0	0.02	3.48	1.01	5.04	0.79	0.16
AT1G59710	0	0	3.48	1	29.07	4.42	0.15
AT5G24010	0	0	3.48	1	19.02	2.63	0.14
AT1G26210	0	0.01	3.48	0.99	12.78	2.44	0.19
AT5G61570	0	0	3.48	0.99	11.91	4.04	0.34
AT5G25580	0.03	0.18	3.48	0.96	1.44	0.21	0.14
AT3G15650	0	0	3.48	0.95	46.94	23.59	0.5
AT1G21980	0	0	3.48	0.95	47.36	9.48	0.2
AT4G28640	0	0.01	3.48	0.94	24.12	2.85	0.12
AT5G02895	0	0.01	3.48	0.86	1.01	0.2	0.19
AT4G32790	0.01	0.04	3.48	0.84	11.41	1.21	0.11
AT1G04020	0	0	3.48	0.83	4.56	1.1	0.24
AT1G16500	0	0	3.48	0.64	15.55	5.69	0.37
AT2G44940	0	0	3.48	0.61	19.21	11.92	0.62
AT4G18840	0	0	3.48	0.6	2.47	0.4	0.16
AT1G74200	0	0.03	3.48	0.54	1.67	0.33	0.2
AT3G24495	0	0.03	3.48	1.83	4.84	0.41	0.08
AT5G60120	0	0.02	3.48	1.83	7.89	0.8	0.1
AT1G55500	0	0.02	3.48	1.83	24.68	2.54	0.1
AT3G19130	0.02	0.14	3.48	1.83	44.99	2.86	0.06
AT2G46980	0.04	0.21	3.48	1.33	5.84	0.5	0.09
AT5G47880	0.01	0.06	3.48	1.09	58.29	3.72	0.06
AT3G45010	0	0.02	3.48	1.06	40.57	2.76	0.07
AT2G38630	0	0.01	3.48	1.63	7.96	1.03	0.13
AT2G31680	0	0	3.48	1.34	17.17	2.45	0.14
AT4G15410	0	0	3.48	1.33	18.2	1.86	0.1
AT4G34980	0.02	0.13	3.48	1.32	307.99	50.34	0.16
AT4G12130	0	0.03	3.48	1.3	9.03	0.88	0.1
AT2G28380	0.04	0.2	3.48	1.27	34.63	2.59	0.07
AT4G09460	0.01	0.07	3.48	5.29	8.11	1.11	0.14
AT1G64390	0.05	0.25	3.47	1.17	32.88	9.95	0.3
AT3G51630	0.02	0.13	3.47	1.88	52.67	4.85	0.09
AT1G66760	0	0	3.46	5.87	5.15	1.78	0.35
AT2G17280	0	0	3.46	1.93	2.18	0.59	0.27
AT3G15470	0	0	3.46	1.3	35.35	3.69	0.1
AT3G10650	0	0.02	3.46	1.25	64.15	4.88	0.08
AT1G18550	0	0	3.46	1.05	5.28	1.84	0.35
AT1G62560	0	0.01	3.46	1.05	49.46	11.8	0.24
AT1G17840	0	0	3.46	1.04	85.92	20.37	0.24
AT5G10020	0	0	3.46	1.03	20.45	4.71	0.23
AT1G22610	0	0	3.46	1	55.72	7.63	0.14
AT4G26680	0.02	0.1	3.46	0.99	1.99	0.28	0.14
AT1G70210	0	0.01	3.46	0.98	7.84	1.42	0.18
AT5G11930	0.04	0.21	3.46	0.88	2.3	0.84	0.36
AT3G13300	0.03	0.16	3.46	2.52	135.99	7.13	0.05
AT3G04830	0	0.01	3.46	1.81	32.08	2.11	0.07
AT2G33360	0.02	0.1	3.46	6.58	14.34	1.78	0.12
AT1G01120	0	0	3.46	1.03	59.06	29	0.49
AT5G51050	0	0	3.46	1.02	10.4	1.94	0.19
AT4G30470	0	0	3.46	1.01	21.61	4.94	0.23
AT3G12110	0	0	3.46	0.98	9.4	4.15	0.44
AT4G16490	0	0	3.46	0.98	111.7	32.72	0.29
AT2G46160	0	0	3.46	0.97	4.29	1.79	0.42
AT2G20100	0	0	3.46	0.97	5.09	1.29	0.25
AT1G70230	0.01	0.09	3.46	0.96	53	4.99	0.09
AT1G69900	0	0	3.46	0.94	7.34	1.4	0.19
AT4G17670	0	0	3.46	0.93	7.63	3.3	0.43
AT5G58690	0	0	3.46	0.92	5.48	1.31	0.24
AT1G16515	0.05	0.24	3.46	0.9	1.44	0.6	0.42
AT1G51060	0	0	3.46	0.89	39.47	12.4	0.31
AT1G59910	0	0.01	3.46	0.83	27.47	2.66	0.1
AT5G41400	0	0	3.46	0.82	16.42	5.21	0.32
AT3G61250	0	0	3.46	0.81	2.28	1.41	0.62
AT1G65860	0.04	0.21	3.46	0.76	23.78	4.72	0.2
AT5G08270	0	0.01	3.46	0.74	5.03	0.4	0.08
AT5G67350	0	0	3.46	0.67	16.85	5.72	0.34
AT4G13345	0	0	3.46	0.63	16.94	3.36	0.2
AT3G52800	0	0.04	3.46	0.48	104.97	14.26	0.14
AT3G06868	0	0.01	3.46	0.37	4.88	1.38	0.28
AT3G54430	0	0	3.46	0.21	4.94	1.3	0.26
AT5G65390	0.01	0.07	3.46	1.71	5.18	1.4	0.27
AT1G06890	0	0.03	3.46	2.18	52.02	2.76	0.05
AT5G08305	0.02	0.12	3.46	1.44	1.37	0.11	0.08
AT5G46740	0.04	0.21	3.46	1.44	6.87	0.26	0.04
AT3G13437	0	0.02	3.46	0.81	2.29	0.49	0.22
AT1G05200	0	0	3.46	1.36	73.35	9.59	0.13
AT1G77680	0	0	3.46	1.35	34.86	3.71	0.11
AT3G03550	0	0	3.46	1.33	14.01	2.48	0.18
AT3G28920	0	0	3.46	1.32	54.73	13.38	0.24
AT3G45230	0	0.01	3.46	1.32	7.59	1.86	0.24
AT1G34200	0	0	3.46	1.14	17.87	1.83	0.1
AT3G06540	0	0	3.46	1.1	26.68	2.5	0.09
AT1G64180	0	0	3.46	1.1	11.42	1.37	0.12
AT1G27910	0	0	3.46	1.09	18.8	3.35	0.18
AT1G16400	0.02	0.13	3.46	1.09	14.13	2.39	0.17
AT3G18830	0.01	0.07	3.46	1.09	84.73	11.96	0.14
AT5G15410	0	0	3.46	1.09	171.5	31.17	0.18
AT1G11960	0	0	3.46	1.08	20.33	4.07	0.2
AT4G36920	0	0	3.46	1.08	34.98	10.02	0.29
AT5G43860	0	0	3.46	1.08	5.46	1.42	0.26
AT5G03210	0	0	3.46	1.07	1.96	1.19	0.6
AT5G65630	0	0	3.46	1.06	108.26	37.67	0.35
AT2G29670	0	0	3.46	1.06	262.44	112.76	0.43
AT4G22770	0	0	3.46	1.06	7.67	4.42	0.58
AT2G47070	0	0	3.46	1.05	148.84	16.4	0.11
AT3G01860	0	0	3.46	1.04	10.55	1.86	0.18
AT5G64550	0	0	3.46	1.03	37.01	17.65	0.48
AT1G30690	0	0	3.46	1.03	30.6	6.28	0.21
AT5G56250	0	0	3.46	1.03	36.57	6.26	0.17
AT2G37560	0	0	3.46	1.03	1.12	0.27	0.25
AT1G62050	0	0	3.46	1.03	15.67	5.6	0.36
AT4G09980	0	0	3.46	1.03	23.6	2.75	0.12
AT2G46150	0	0	3.46	1.02	3.74	1.15	0.31
AT4G36120	0	0	3.46	1.01	6.24	1.89	0.3
AT3G27010	0.01	0.07	3.46	1.01	10.88	1.31	0.12
AT5G19420	0	0	3.46	1	16.5	1.69	0.1
AT3G52190	0	0	3.46	1	10.11	1.63	0.16
AT1G11700	0	0	3.46	0.99	57.42	17.81	0.31
AT1G14130	0	0	3.46	0.91	6.89	0.75	0.11
AT5G16560	0	0	3.46	0.86	12.47	2.58	0.21
AT2G44770	0	0	3.46	0.75	15.01	3.46	0.23
AT3G58040	0	0	3.46	0.65	29.62	2.31	0.08
AT5G06000	0.01	0.07	3.46	1.93	1.52	0.22	0.14
AT3G12800	0	0.02	3.46	1.93	85.03	3.42	0.04
AT3G13670	0.01	0.06	3.46	1.93	91.99	3.48	0.04
AT5G35430	0	0.01	3.46	1.69	28.07	1.11	0.04
AT5G42050	0	0.01	3.46	1.44	213.49	13.36	0.06
AT2G20610	0	0	3.46	1.13	198.39	20.31	0.1
AT5G15025	0	0.01	3.46	0.89	3.83	0.39	0.1
AT3G26910	0.02	0.11	3.46	0.27	20.22	1.71	0.08
AT3G55320	0	0	3.46	1.45	28.87	2.34	0.08
AT5G26230	0	0	3.46	1.44	9.9	2.32	0.23
AT3G18370	0	0	3.46	1.43	85.79	6.91	0.08
AT2G05812	0	0	3.46	1.39	13.34	3.3	0.25
AT4G02600	0.03	0.15	3.46	1.39	49.8	2.85	0.06
AT4G17550	0	0	3.46	1.37	44.66	9.07	0.2
AT2G03480	0	0	3.46	1.37	13.07	3.11	0.24
AT5G50350	0	0.02	3.46	1.36	8.26	1.01	0.12
AT4G40050	0	0	3.46	1.1	52.36	8.12	0.16
AT1G72700	0	0	3.43	1.39	36.78	7.37	0.2
AT1G63700	0	0	3.43	1.37	45.77	3.81	0.08
AT4G29140	0	0	3.43	1.37	5.59	1.16	0.21
AT4G04210	0	0	3.43	1.37	54.17	8.76	0.16
AT3G06770	0.03	0.15	3.43	1.37	14.76	2.64	0.18
AT1G53500	0	0	3.43	1.36	63.93	16.43	0.26
AT3G14720	0	0	3.43	1.34	37.89	18.5	0.49
AT2G29550	0	0.03	3.43	1.32	49.86	8	0.16
AT1G67570	0.02	0.13	3.43	1.32	2.7	0.34	0.13
AT1G24170	0	0	3.43	1.31	26.49	6.8	0.26
AT5G04885	0	0.02	3.43	1.25	10.31	1.26	0.12
AT1G01950	0	0	3.43	1.12	19.04	2.57	0.13
AT1G28600	0	0.01	3.43	1.11	64.5	13.34	0.21
AT5G25510	0.01	0.07	3.43	1.11	26.35	2.11	0.08
AT3G02910	0	0	3.43	1.1	51.86	16.8	0.32
AT4G30400	0	0	3.43	1.09	10.97	4.14	0.38
AT5G10550	0	0	3.43	1.08	67.53	15.7	0.23
AT5G41620	0	0	3.43	1.06	7.05	1.59	0.23
AT5G61420	0	0	3.43	1.04	87.81	17.71	0.2
AT3G61750	0	0.01	3.43	1.03	6.87	1.64	0.24
AT3G25140	0.02	0.13	3.43	2.78	97.46	10.89	0.11
AT2G26680	0	0	3.43	2.65	18.78	1.41	0.08
AT2G25610	0.05	0.24	3.43	2.28	33.83	2.09	0.06
AT4G37320	0	0.04	3.43	6.85	9.53	1.61	0.17
AT1G17830	0.05	0.24	3.43	6.73	1.73	0.38	0.22
AT2G46590	0	0.02	3.43	6.46	4.11	0.8	0.19
AT3G61690	0	0.01	3.43	1.15	44.98	2.51	0.06
AT4G23200	0	0	3.43	1.07	13.69	4.88	0.36
AT1G73100	0	0	3.43	1.07	16.14	1.74	0.11
AT2G17820	0	0	3.43	1.07	38.01	8.16	0.21
AT5G09460	0	0	3.43	1.06	97.73	28.07	0.29
AT3G05320	0	0	3.43	1.05	9.65	3.02	0.31
AT4G00900	0	0	3.43	1.03	20.96	4.88	0.23
AT2G46660	0	0	3.43	1.02	4.94	1.92	0.39
AT2G05940	0	0	3.43	1.02	37.87	10.22	0.27
AT2G23300	0	0	3.43	1.02	2.98	0.98	0.33
AT1G62870	0	0	3.43	1.01	2.03	1.15	0.57
AT1G53380	0	0	3.43	0.99	25.85	3.83	0.15
AT2G37650	0	0	3.43	0.98	15.73	2.34	0.15
AT5G66310	0	0	3.43	0.98	12.59	2.82	0.22
AT1G51660	0	0	3.43	0.98	33.17	8.09	0.24
AT5G16200	0	0	3.43	0.97	10.03	3.54	0.35
AT1G70550	0	0.01	3.43	0.95	9.44	2.04	0.22
AT3G46790	0	0	3.43	0.94	15.61	1.92	0.12
AT4G33440	0	0.03	3.43	0.92	5.3	1.16	0.22
AT4G08980	0	0	3.43	0.88	58.84	6.33	0.11
AT4G35270	0	0.03	3.43	0.82	34.99	4.99	0.14
AT5G19260	0	0	3.43	0.77	7.7	2.48	0.32
AT4G39190	0	0	3.43	0.62	7.15	2.08	0.29
AT2G45680	0	0	3.43	0.35	39.74	19.12	0.48
AT5G47800	0	0	3.43	0.34	9	2.28	0.25
AT1G17480	0	0	3.43	0.3	4.09	0.87	0.21
AT5G60760	0.01	0.07	3.43	0.05	1.54	0.48	0.31
AT5G13390	0.01	0.07	3.43	1.87	53.52	3.52	0.07
AT5G45275	0.01	0.08	3.43	1.7	9.46	0.91	0.1
AT5G08260	0.05	0.24	3.43	2.53	44.27	4.83	0.11
AT3G50120	0	0	3.43	2.04	2.23	0.82	0.37
AT5G36890	0	0	3.43	2.04	14.7	1.08	0.07
AT3G22370	0.02	0.13	3.43	1.8	48.34	3.86	0.08
AT4G11000	0.02	0.12	3.43	6.27	6	1.35	0.22
AT1G72360	0.02	0.1	3.43	0.84	4.97	0.61	0.12
AT3G17790	0.01	0.06	3.43	0.67	75.87	11	0.14
AT5G22690	0.01	0.04	3.43	0.26	10.42	1.14	0.11
AT5G22860	0	0.01	3.43	0.16	12.81	2.06	0.16
AT3G53680	0.01	0.05	3.43	0.15	2.66	0.39	0.15
AT5G45260	0	0.01	3.43	2.04	27.93	1.62	0.06
AT3G08800	0	0.02	3.43	1.55	4.32	0.31	0.07
AT2G31730	0	0	3.43	1.41	3.35	0.79	0.24
AT1G17720	0	0	3.43	1.37	55.33	4.8	0.09
AT5G49820	0	0.01	3.43	1.17	31.15	2.12	0.07
AT1G25425	0	0	3.43	1.15	4.88	1.47	0.3
AT3G08620	0	0.03	3.43	1.15	10.27	1.21	0.12
AT2G28550	0	0	3.43	1.13	100.61	32.4	0.32
AT2G36970	0	0	3.43	1.13	31.12	9.67	0.31
AT1G34260	0	0	3.43	1.13	25.26	4.17	0.17
AT3G17390	0	0	3.43	1.12	407.39	115.45	0.28
AT3G25290	0	0	3.43	1.12	19.04	6.2	0.33
AT2G46420	0	0	3.43	1.11	51.72	18.16	0.35
AT1G19300	0	0	3.43	1.11	13.94	3.6	0.26
AT4G12300	0	0	3.43	1.11	54.42	11.33	0.21
AT1G67360	0	0	3.43	1.1	82.42	50.55	0.61
AT3G11700	0	0	3.43	1.1	100.22	15.68	0.16
AT1G61800	0	0	3.43	1.09	96.26	67.41	0.7
AT4G01540	0	0	3.43	1.09	11.44	3.85	0.34
AT3G61670	0	0	3.43	1.08	17.76	2.93	0.16
AT5G12010	0	0	3.43	1.08	22.2	4.09	0.18
AT4G04920	0	0	3.43	1.08	32.05	3.84	0.12
AT4G00550	0.01	0.07	3.43	1.07	19.27	1.43	0.07
AT1G78610	0	0	3.43	1.06	26.93	6.29	0.23
AT3G61880	0.03	0.15	3.43	0.94	18.48	1.74	0.09
AT1G61260	0	0	3.43	0.93	3.36	1.06	0.31
AT1G15110	0	0	3.43	0.9	8.24	1.39	0.17
AT1G24100	0	0	3.43	0.89	117.03	19.53	0.17
AT4G32000	0	0	3.43	0.88	1.74	0.33	0.19
AT1G24280	0	0	3.43	0.78	7.91	1.38	0.17
AT1G60545	0.02	0.12	3.43	0.71	9.86	0.85	0.09
AT5G06460	0	0	3.43	2.04	43.3	3.11	0.07
AT1G76390	0.03	0.17	3.43	1.8	28.43	1.54	0.05
AT3G08710	0.02	0.1	3.43	1.55	27.63	1.69	0.06
AT1G25370	0	0	3.43	1.21	7.72	1.45	0.19
AT3G09550	0	0	3.43	2.67	2	0.34	0.17
AT3G27325	0.04	0.22	3.43	2.64	29.33	1.43	0.05
AT1G68060	0	0	3.43	2.29	23.38	2.68	0.11
AT4G13350	0	0	3.43	2.04	89.94	5.67	0.06
AT5G49300	0	0	3.43	1.6	2.38	0.41	0.17
AT2G20950	0	0	3.43	1.52	69.04	12.22	0.18
AT5G41920	0	0	3.43	1.49	20.37	3.14	0.15
AT1G54270	0	0.01	3.43	1.49	130.66	9.43	0.07
AT4G08180	0	0	3.43	1.49	39.11	2.45	0.06
AT1G80530	0.02	0.15	3.43	1.47	34.17	3.23	0.09
AT3G58580	0	0	3.43	1.46	25.02	2	0.08
AT3G03520	0	0	3.43	1.44	35.85	6.45	0.18
AT2G37585	0	0	3.43	1.43	5.2	1.77	0.34
AT3G03050	0	0	3.43	1.42	32.09	4.23	0.13
AT5G53400	0	0	3.43	1.41	34.41	5.42	0.16
AT5G20700	0	0	3.43	1.4	1060.45	206.35	0.19
AT1G12110	0	0	3.43	1.4	352.06	99.3	0.28
AT2G30780	0	0	3.43	1.38	12.76	1.64	0.13
AT1G08400	0	0.01	3.43	1.14	7.46	0.53	0.07
AT5G57740	0	0.01	3.43	1.13	9.04	1.07	0.12
AT1G02816	0	0	3.41	5.68	15.76	2.37	0.15
AT4G17770	0	0	3.41	1.43	181.33	96.96	0.53
AT5G57070	0	0	3.41	1.43	21.68	5.23	0.24
AT4G18570	0	0	3.41	1.43	59.59	17.4	0.29
AT1G63430	0	0	3.41	1.43	34.11	4.57	0.13
AT3G13110	0	0	3.41	1.42	260.4	87.03	0.33
AT2G39220	0	0	3.41	1.42	10.12	3.37	0.33
AT3G63260	0	0.02	3.41	1.41	71.94	8.31	0.12
AT2G25140	0	0	3.41	1.41	23.53	2.02	0.09
AT5G54590	0	0	3.41	1.41	6.14	0.92	0.15
AT4G23630	0	0	3.41	1.39	305.36	59.18	0.19
AT5G53420	0	0	3.41	1.39	204.12	71.36	0.35
AT3G23000	0	0	3.41	1.38	345.62	124.82	0.36
AT1G80120	0	0	3.41	1.37	15.17	4.33	0.29
AT1G69295	0	0	3.41	1.36	91.42	16.49	0.18
AT1G69690	0	0.01	3.41	1.35	11.45	2.16	0.19
AT3G23750	0.02	0.12	3.41	1.32	47.67	3.76	0.08
AT1G74410	0.02	0.12	3.41	1.24	8.39	0.78	0.09
AT3G24760	0.02	0.1	3.41	1.24	15.13	2.56	0.17
AT3G19000	0	0	3.41	1.21	40.27	6.14	0.15
AT2G29970	0	0	3.41	1.2	42.37	5.38	0.13
AT1G63670	0.01	0.05	3.41	1.18	20.31	3.77	0.19
AT1G11592	0	0	3.41	1.18	8.99	1.01	0.11
AT1G28660	0	0	3.41	1.15	113.19	25.87	0.23
AT5G67280	0	0	3.41	1.15	26.54	14.58	0.55
AT1G61930	0	0	3.41	1.14	3.82	2.39	0.63
AT3G23410	0.02	0.11	3.41	1.14	25.4	3.97	0.16
AT1G77855	0.04	0.2	3.41	1.14	2	0.38	0.19
AT5G62220	0	0	3.41	1.13	23.78	8.9	0.37
AT5G37020	0	0	3.41	1.12	29.83	5.87	0.2
AT3G55050	0	0	3.41	1.11	16.13	1.83	0.11
AT3G12610	0	0	3.41	1.1	56.13	15.77	0.28
AT1G55550	0	0.02	3.41	1.09	2.89	0.49	0.17
AT1G76950	0	0	3.41	1.08	24.39	3.43	0.14
AT3G45210	0	0.01	3.41	1.07	19.31	4.58	0.24
AT1G12380	0	0.04	3.41	1.03	4.99	1.76	0.35
AT2G23520	0	0.01	3.41	0.96	16.83	1.4	0.08
AT1G19835	0.01	0.07	3.41	6.7	80.01	8.44	0.11
AT1G64140	0	0	3.41	6.5	131.19	17.68	0.13
AT4G34590	0	0	3.41	1.16	48.76	16.91	0.35
AT4G25350	0.01	0.07	3.41	1.15	1.73	0.35	0.2
AT4G33040	0	0	3.41	1.14	20.64	7.03	0.34
AT1G20823	0	0	3.41	1.12	38.32	13.77	0.36
AT5G43760	0	0	3.41	1.11	75.04	17.19	0.23
AT3G27960	0	0.01	3.41	1.1	10.4	2.07	0.2
AT1G04570	0	0	3.41	1.1	2.11	1.63	0.77
AT2G40475	0	0.02	3.41	1.1	25.86	10.27	0.4
AT3G05690	0	0	3.41	1.09	6.91	2.77	0.4
AT1G12430	0	0	3.41	1.06	28.5	4.25	0.15
AT5G52430	0	0.02	3.41	1.05	21.95	1.69	0.08
AT4G00500	0	0	3.41	1.05	17.82	1.57	0.09
AT2G35650	0	0	3.41	1.05	9.24	1.85	0.2
AT1G10650	0	0	3.41	1.04	22.46	7.02	0.31
AT4G15500	0	0.02	3.41	1.04	4.32	1.69	0.39
AT2G46430	0	0	3.41	1.04	76.18	15.52	0.2
AT5G40850	0	0.01	3.41	1.04	45.37	4.53	0.1
AT5G66950	0	0	3.41	1.02	23.89	3.32	0.14
AT1G79110	0	0	3.41	1.01	31.55	7.46	0.24
AT1G15100	0	0	3.41	1	15.18	4.04	0.27
AT5G08550	0.04	0.21	3.41	1	21.72	1.07	0.05
AT5G39980	0	0.02	3.41	1	3.99	0.49	0.12
AT5G07240	0	0.03	3.41	0.89	62.87	11.07	0.18
AT2G46080	0	0	3.41	0.82	47.29	7.56	0.16
AT5G46680	0.01	0.07	3.41	0.73	2.48	0.4	0.16
AT5G44562	0	0.01	3.41	0.69	1.36	0.57	0.42
AT5G48850	0	0	3.41	0.55	5.95	3.82	0.64
AT1G60960	0	0	3.41	0.25	19.44	5.23	0.27
AT1G04770	0	0.01	3.41	0.18	16.76	3.03	0.18
AT3G29770	0.03	0.16	3.41	0.18	12	1.64	0.14
AT5G11430	0	0.02	3.41	0.03	17.84	0.82	0.05
AT3G25700	0	0	3.41	1.68	10.03	2.63	0.26
AT3G14790	0	0	3.41	1.67	26.89	3.77	0.14
AT5G43880	0	0	3.41	1.66	41.07	7.37	0.18
AT4G34390	0	0.01	3.41	6.69	42.03	4.41	0.1
AT5G54850	0.01	0.08	3.41	6.55	2.86	0.38	0.13
AT4G27830	0	0	3.41	0.96	47.68	4.75	0.1
AT1G74450	0	0	3.41	0.75	24.79	3.69	0.15
AT4G23810	0.03	0.15	3.41	0.26	15.01	3.12	0.21
AT3G62200	0	0	3.41	1.41	17.96	2.47	0.14
AT5G04590	0	0	3.41	1.21	447.85	38.11	0.09
AT3G24320	0.02	0.12	3.41	1.19	7.03	0.64	0.09
AT5G13110	0	0	3.41	1.17	21.63	3.76	0.17
AT4G32250	0	0	3.41	1.17	47.86	7.96	0.17
AT5G16730	0	0	3.41	1.16	78.22	20.55	0.26
AT5G09470	0	0	3.41	1.16	3.69	2.38	0.64
AT1G11710	0.03	0.15	3.41	1.15	2.9	0.43	0.15
AT5G53430	0	0	3.41	1.14	17.27	4.65	0.27
AT5G20730	0	0	3.41	1.13	65.2	6.86	0.11
AT2G45720	0	0	3.41	1.12	18.79	3.83	0.2
AT4G37640	0.04	0.22	3.41	1.11	70.41	9.25	0.13
AT4G02110	0	0	3.41	1.07	2.54	0.44	0.17
AT1G11390	0	0.03	3.41	0.91	11.9	0.89	0.07
AT5G59732	0	0	3.41	0.89	7.12	1.51	0.21
AT3G47940	0	0	3.41	0.86	5.72	0.65	0.11
AT1G77840	0.01	0.04	3.41	2.14	44.7	1.9	0.04
AT1G24625	0	0.01	3.41	2.14	22.47	2.97	0.13
AT5G56630	0	0	3.41	2.14	37.11	4.65	0.13
AT4G31160	0.01	0.1	3.41	2.14	43.47	2.68	0.06
AT1G71710	0.03	0.18	3.41	2.02	25.97	2.67	0.1
AT3G49725	0.02	0.12	3.41	1.9	8.59	0.6	0.07
AT5G10270	0.03	0.18	3.41	1.9	19.04	0.99	0.05
AT5G54830	0.02	0.11	3.41	1.9	19.76	0.95	0.05
AT1G54990	0	0.01	3.41	1.78	39.38	4.16	0.11
AT1G13860	0	0.02	3.41	1.71	14.8	2.5	0.17
AT3G54290	0.01	0.06	3.41	1.56	23.96	2.37	0.1
AT1G65840	0	0.03	3.41	1.56	47.65	8.66	0.18
AT5G03640	0	0	3.41	1.51	2.71	0.97	0.36
AT2G47060	0.01	0.06	3.41	1.51	58	8.11	0.14
AT4G18070	0	0	3.41	1.49	50.55	10.17	0.2
AT3G28050	0.02	0.13	3.41	1.48	115.76	17	0.15
AT5G12170	0	0	3.41	1.46	77.67	15.81	0.2
AT3G03780	0	0	3.41	1.45	205.61	33.51	0.16
AT5G20180	0	0	3.41	1.45	28.68	3.86	0.13
AT2G20570	0	0.01	3.41	1.44	509.76	101.56	0.2
AT1G15885	0	0.02	3.41	5.18	2.38	0.44	0.19
AT3G06010	0.02	0.14	3.38	4.56	25.94	1.25	0.05
AT4G01020	0	0	3.38	1.5	29.2	2.32	0.08
AT3G23820	0	0	3.38	1.48	264.62	81.35	0.31
AT4G13840	0	0	3.38	1.48	164.13	47.4	0.29
AT1G60890	0	0	3.38	1.47	15.04	2.85	0.19
AT5G06510	0	0.01	3.38	1.46	8.76	2.68	0.31
AT1G56650	0	0	3.38	1.44	17.95	10.07	0.56
AT4G36830	0	0	3.38	1.44	4.71	2.1	0.45
AT3G06410	0	0	3.38	1.44	22.35	4.56	0.2
AT1G47240	0	0	3.38	1.44	19.56	2.31	0.12
AT5G45720	0	0	3.38	1.42	3.89	1.3	0.33
AT3G11670	0	0	3.38	1.42	155.56	45.94	0.3
AT3G08680	0	0.02	3.38	1.41	25.03	5.01	0.2
AT5G62230	0	0.04	3.38	1.38	1.07	0.35	0.33
AT2G05920	0.03	0.16	3.38	1.34	116.68	25.66	0.22
AT4G36180	0	0	3.38	1.24	10.28	2.8	0.27
AT1G53230	0	0	3.38	1.24	61.09	16.32	0.27
AT5G48450	0	0	3.38	1.23	2.77	0.45	0.16
AT1G59970	0	0.01	3.38	1.21	11.54	3.46	0.3
AT1G52310	0	0	3.38	1.21	25.7	2.75	0.11
AT2G17480	0	0	3.38	1.21	20.85	1.96	0.09
AT3G61610	0	0	3.38	1.21	3.18	1.07	0.34
AT1G33470	0	0	3.38	1.21	41.97	4.48	0.11
AT2G43290	0	0.01	3.38	1.2	24.01	5.04	0.21
AT4G35320	0.01	0.04	3.38	1.18	22.14	6.95	0.31
AT5G66770	0	0	3.38	1.18	19.29	6.3	0.33
AT3G03690	0	0	3.38	1.18	8.65	2.6	0.3
AT5G38970	0	0	3.38	1.18	3.57	2.04	0.57
AT1G55690	0	0	3.38	1.18	10.86	2.21	0.2
AT5G11590	0	0	3.38	1.18	2.71	1.87	0.69
AT5G51770	0	0	3.38	1.18	15.59	4.79	0.31
AT5G67540	0	0.02	3.38	1.17	16.99	1.56	0.09
AT4G10955	0.03	0.15	3.38	1.16	3.11	0.94	0.3
AT4G20170	0	0	3.38	1.16	51.98	32.73	0.63
AT2G25620	0	0	3.38	1.15	9.35	2.01	0.21
AT1G48480	0	0	3.38	1.15	45.17	12.49	0.28
AT4G01070	0	0	3.38	1.14	172.95	59.7	0.35
AT1G05170	0	0	3.38	1.14	21.05	5.31	0.25
AT1G51340	0	0	3.38	1.1	18.35	2.16	0.12
AT1G14350	0	0	3.38	1.08	19.05	4.73	0.25
AT4G09970	0.02	0.14	3.38	1	7.51	1.75	0.23
AT1G55210	0.01	0.08	3.38	0.97	68.64	14.65	0.21
AT5G61970	0.01	0.05	3.38	3.09	38.15	1.22	0.03
AT2G39130	0	0	3.38	3.07	14.11	1.66	0.12
AT3G18420	0.01	0.05	3.38	3.03	27.81	1.65	0.06
AT1G19580	0.01	0.06	3.38	1.91	27.07	2.05	0.08
AT2G19710	0.03	0.16	3.38	6.45	17.99	1.51	0.08
AT1G28685	0	0	3.38	1.24	1.28	0.25	0.2
AT5G19920	0.05	0.25	3.38	1.2	4.88	0.5	0.1
AT5G19900	0	0	3.38	1.17	32.16	6.3	0.2
AT2G46380	0	0	3.38	1.16	5.89	1.56	0.26
AT5G35450	0.01	0.07	3.38	1.16	19.28	2.56	0.13
AT4G20300	0	0	3.38	1.14	36.58	6.41	0.18
AT1G44100	0	0	3.38	1.13	69	23.87	0.35
AT4G02940	0	0	3.38	1.11	76.33	14.22	0.19
AT4G01450	0	0	3.38	1.11	19.45	4.91	0.25
AT2G41330	0	0.03	3.38	1.07	6.73	2.03	0.3
AT2G32910	0.04	0.23	3.38	1.06	33.18	1.55	0.05
AT1G67720	0	0	3.38	1.05	33.45	4.21	0.13
AT2G41010	0	0.01	3.38	0.71	17.53	6.13	0.35
AT4G02410	0	0.03	3.38	0.61	34.63	6.1	0.18
AT2G02020	0	0	3.38	0.47	12.95	3.09	0.24
AT5G53140	0	0	3.38	2.6	129.36	12.25	0.09
AT1G63000	0	0	3.38	1.84	70.81	8.41	0.12
AT4G00870	0.03	0.16	3.38	1.78	7.8	2.78	0.36
AT4G39730	0.01	0.05	3.38	1.77	184.11	32.58	0.18
AT4G27560	0	0	3.38	1.74	38.56	8.62	0.22
AT5G43950	0.01	0.06	3.38	1.73	7.52	1.11	0.15
AT3G14810	0.03	0.17	3.38	1.48	46.82	6.81	0.15
AT3G13570	0	0	3.38	1.48	28.64	2.15	0.08
AT2G13600	0.01	0.05	3.38	6.5	2.03	0.22	0.11
AT5G65170	0.04	0.2	3.38	6.31	1.32	0.26	0.2
AT1G55170	0	0.03	3.38	0.84	7.72	0.33	0.04
AT2G24490	0.01	0.04	3.38	0.46	3.96	0.55	0.14
AT4G12110	0.01	0.08	3.38	1.45	26.66	1.64	0.06
AT3G27060	0	0.04	3.38	1.4	28.62	3.7	0.13
AT1G22882	0	0	3.38	1.27	20.93	2.55	0.12
AT3G19980	0.02	0.13	3.38	1.26	23.36	1.74	0.07
AT1G27760	0	0.01	3.38	1.23	59.54	8.8	0.15
AT3G51770	0	0	3.38	1.23	32.48	1.72	0.05
AT3G52220	0.01	0.08	3.38	1.22	32.91	2.18	0.07
AT2G20010	0	0	3.38	1.22	29.59	2.81	0.09
AT1G47890	0.01	0.08	3.38	1.14	2.81	0.76	0.27
AT1G76660	0.01	0.04	3.38	2.25	23.55	1.43	0.06
AT1G53390	0.04	0.22	3.38	2.25	41.83	0.83	0.02
AT4G36020	0.02	0.14	3.38	1.53	20.58	1.9	0.09
AT2G17700	0.01	0.05	3.38	2.46	25.67	2.36	0.09
AT1G76270	0.02	0.12	3.38	2.25	9.87	0.82	0.08
AT1G05960	0.02	0.13	3.38	2.25	43.14	2.29	0.05
AT3G24503	0.01	0.04	3.38	2.25	213.46	16.36	0.08
AT4G30340	0.05	0.24	3.38	2.01	16.41	1.32	0.08
AT1G13900	0	0.02	3.38	1.9	30.29	2.78	0.09
AT1G79090	0	0	3.38	1.61	64.9	4.25	0.07
AT1G05010	0.02	0.1	3.38	1.6	651.44	98.6	0.15
AT4G01660	0.01	0.06	3.38	1.58	17.54	1.17	0.07
AT4G21670	0.02	0.11	3.38	1.55	29.02	3.17	0.11
AT1G71360	0	0	3.38	1.54	13.7	2.76	0.2
AT1G80490	0	0	3.38	1.53	43.37	7.22	0.17
AT1G43710	0	0	3.38	1.52	97.67	20.3	0.21
AT1G55535	0	0	3.38	1.52	8.27	0.9	0.11
AT3G07570	0	0.02	3.38	1.52	17.04	2.36	0.14
AT1G30330	0	0	3.38	1.51	37.68	5.07	0.13
AT1G17620	0	0	3.38	1.5	31.85	7.54	0.24
AT2G40380	0	0	3.38	1.49	23.1	3.27	0.14
AT3G02570	0	0	3.38	1.49	54.19	14.32	0.26
AT1G58440	0	0.01	3.38	1.49	40.63	4.42	0.11
AT3G27570	0	0	3.38	1.49	50.91	9.19	0.18
AT3G29810	0	0	3.38	1.29	11.23	1.72	0.15
AT1G47480	0	0	3.38	1.26	5.19	1.09	0.21
AT4G21534	0.02	0.11	3.36	6.15	14.58	1.24	0.09
AT4G22580	0	0	3.36	1.52	21.91	4.89	0.22
AT4G32800	0	0	3.36	1.52	7.71	2.54	0.33
AT1G55680	0	0	3.36	1.51	144.57	26.88	0.19
AT4G29680	0	0	3.36	1.51	29.71	4.08	0.14
AT5G11550	0	0.01	3.36	1.5	18.83	5.5	0.29
AT1G01610	0	0.02	3.36	1.5	50.18	9.5	0.19
AT2G15620	0	0	3.36	1.5	116.51	38.78	0.33
AT1G69910	0	0	3.36	1.49	13	3.32	0.26
AT3G46450	0	0	3.36	1.48	65.87	20.62	0.31
AT2G03140	0	0	3.36	1.48	57.08	9.93	0.17
AT4G32010	0.01	0.08	3.36	1.48	29.86	2.05	0.07
AT3G63120	0	0.03	3.36	1.48	29.09	4.01	0.14
AT5G49215	0	0	3.36	1.48	8.71	2.92	0.34
AT5G67160	0	0.04	3.36	1.48	17.61	4.79	0.27
AT5G41900	0	0.01	3.36	1.47	8.26	4.35	0.53
AT4G30560	0	0	3.36	1.47	5.45	0.95	0.17
AT1G07870	0	0.01	3.36	1.44	7.23	1.13	0.16
AT5G44370	0	0	3.36	1.44	7.11	1.28	0.18
AT1G61890	0.01	0.05	3.36	1.27	43.31	11.39	0.26
AT3G10540	0.02	0.14	3.36	1.27	15.7	1.12	0.07
AT1G28340	0	0	3.36	1.27	38.87	5.05	0.13
AT1G11090	0.01	0.09	3.36	1.26	12.82	1.67	0.13
AT5G06610	0	0	3.36	1.24	4.48	0.83	0.19
AT1G32260	0.01	0.07	3.36	1.24	11.39	0.77	0.07
AT4G35890	0	0	3.36	1.24	58.96	5.62	0.1
AT4G16120	0	0	3.36	1.24	11.72	2.28	0.19
AT1G48110	0	0	3.36	1.23	45.45	4.04	0.09
AT2G47630	0	0.01	3.36	1.22	6.5	1.18	0.18
AT1G19630	0	0	3.36	1.22	1.28	0.73	0.57
AT5G65683	0.02	0.1	3.36	1.22	25.1	6.58	0.26
AT4G39800	0	0	3.36	1.22	302.54	155.66	0.51
AT5G20680	0	0	3.36	1.21	19.75	2.59	0.13
AT1G45249	0	0	3.36	1.19	29.69	6.65	0.22
AT3G51480	0.01	0.08	3.36	1.19	6.86	1.31	0.19
AT5G42990	0	0	3.36	1.18	24.2	6.09	0.25
AT1G04120	0	0.03	3.36	1.18	70.95	6.99	0.1
AT3G56370	0.04	0.22	3.36	1.16	49.16	15.43	0.31
AT5G60690	0	0	3.36	1.16	13.38	2.78	0.21
AT1G64080	0	0.01	3.36	1.16	8.58	2.41	0.28
AT1G08250	0.02	0.14	3.36	1.15	20.2	4.02	0.2
AT1G68570	0.01	0.09	3.36	1.15	43.73	8.75	0.2
AT5G05790	0	0	3.36	1.14	7.4	1.63	0.22
AT3G61950	0	0	3.36	1.14	6.29	2.52	0.4
AT2G41000	0.02	0.11	3.36	1.12	8.49	1.12	0.13
AT5G01030	0.01	0.07	3.36	1.08	15.65	1.81	0.12
AT3G14730	0	0.01	3.36	1	1.79	0.23	0.13
AT5G63940	0	0	3.36	1	21.11	4.23	0.2
AT2G43440	0.01	0.08	3.36	1	1.19	0.55	0.46
AT3G18310	0.01	0.1	3.36	2.89	12.6	0.73	0.06
AT4G33945	0	0	3.36	2.16	16.66	1.56	0.09
AT2G40095	0.02	0.12	3.36	1.23	6.9	0.94	0.14
AT1G07390	0	0	3.36	1.21	13	3.45	0.27
AT1G17420	0	0	3.36	1.2	14.59	4.19	0.29
AT5G55400	0	0.03	3.36	1.2	8.4	1.45	0.17
AT1G77280	0	0	3.36	1.19	12.59	2.96	0.23
AT2G44600	0	0.01	3.36	1.14	7.18	1.59	0.22
AT3G03450	0	0	3.36	1.09	5.56	3.13	0.56
AT3G23210	0	0	3.36	1.07	7.6	3.39	0.45
AT3G23160	0	0	3.36	1.02	9.41	1.51	0.16
AT3G29375	0	0.03	3.36	1	10.75	1.08	0.1
AT4G26640	0.01	0.06	3.36	1	51.49	3.58	0.07
AT1G32240	0	0.01	3.36	0.96	5.99	1.45	0.24
AT4G08850	0	0.01	3.36	0.59	203.68	49.4	0.24
AT1G20950	0	0	3.36	2.27	35.65	5.31	0.15
AT3G09540	0	0	3.36	1.81	9.76	2.87	0.29
AT4G39210	0	0	3.36	1.77	199.07	69.59	0.35
AT3G23300	0	0	3.36	1.77	57.3	8.18	0.14
AT3G02580	0	0	3.36	1.77	29.24	3.6	0.12
AT3G57360	0	0.01	3.36	6.25	1.43	0.24	0.17
AT3G16030	0	0	3.36	0.54	11.07	1.53	0.14
AT2G21710	0.01	0.05	3.36	2.11	4.92	0.22	0.04
AT3G45640	0.01	0.07	3.36	1.3	196.61	22.32	0.11
AT3G19150	0	0	3.36	1.29	9.38	2.57	0.27
AT4G17695	0	0	3.36	1.29	5.29	1.19	0.22
AT4G24740	0	0.02	3.36	1.28	61.14	7.79	0.13
AT1G70750	0	0	3.36	1.27	16.69	2.18	0.13
AT4G08170	0	0	3.36	1.25	9.22	0.97	0.11
AT1G70780	0	0	3.36	1.25	82.97	18.4	0.22
AT2G46650	0	0	3.36	1.25	60.01	8.59	0.14
AT4G21903	0	0.01	3.36	1.25	6.6	1.7	0.26
AT1G76980	0	0.01	3.36	1.21	5.73	1.17	0.2
AT2G43020	0	0.01	3.36	2.35	34.57	6.64	0.19
AT1G18580	0.02	0.12	3.36	2.8	17.78	0.77	0.04
AT1G20300	0.03	0.16	3.36	2.72	11.36	0.76	0.07
AT1G77810	0	0	3.36	2.35	19.62	3.75	0.19
AT3G46980	0	0.01	3.36	2.08	29.39	2.17	0.07
AT2G38280	0	0.01	3.36	2.06	70.36	8.14	0.12
AT1G52720	0	0.03	3.36	1.96	14.31	1.39	0.1
AT1G31280	0	0	3.36	1.95	28.61	2.5	0.09
AT2G29190	0.01	0.08	3.36	1.94	59.41	4.34	0.07
AT2G42230	0	0.01	3.36	1.91	22.46	2.19	0.1
AT1G78680	0.01	0.04	3.36	1.89	181.38	31.81	0.18
AT5G24570	0.02	0.11	3.36	1.84	10.88	1.23	0.11
AT2G35620	0	0	3.36	1.81	29.72	3.61	0.12
AT5G20410	0.01	0.04	3.36	1.8	23.6	3.3	0.14
AT4G16360	0	0	3.36	1.79	32.87	4.04	0.12
AT3G03810	0.01	0.1	3.36	1.78	15.12	1.07	0.07
AT3G01780	0	0	3.36	1.75	53.31	4.45	0.08
AT5G64640	0	0	3.36	1.74	6.39	1.35	0.21
AT3G51160	0.04	0.2	3.36	1.69	47.42	5.97	0.13
AT1G02270	0	0.01	3.36	1.65	34.56	6.48	0.19
AT1G07670	0	0.02	3.36	1.65	53.33	3.88	0.07
AT4G38200	0	0	3.36	1.64	39.92	3.74	0.09
AT5G56000	0	0.03	3.36	1.63	25.62	2.76	0.11
AT5G63410	0.04	0.21	3.36	1.6	50.2	6.58	0.13
AT1G71230	0.01	0.08	3.36	1.59	3.88	0.41	0.11
AT3G01720	0.01	0.06	3.36	1.59	42.29	2.74	0.06
AT1G77610	0	0	3.36	1.59	33.09	4.33	0.13
AT3G05050	0.03	0.16	3.36	1.58	25.12	2.06	0.08
AT3G15030	0	0	3.36	1.58	37.28	9.53	0.26
AT2G38610	0	0.01	3.36	1.56	26.44	3.7	0.14
AT5G07460	0	0.01	3.36	1.55	77.87	9.9	0.13
AT1G64640	0	0	3.36	1.54	11.48	2.82	0.25
AT1G03250	0.02	0.14	3.36	1.39	24.88	1.96	0.08
AT4G39030	0	0.02	3.36	1.33	16.63	3.01	0.18
AT2G34970	0.04	0.2	3.36	1.24	21.05	1.33	0.06
AT4G39560	0.03	0.17	3.36	5.39	6.93	0.51	0.07
AT3G57080	0	0.02	3.34	5.84	11.85	0.74	0.06
AT4G02630	0.01	0.07	3.34	1.79	38.48	6.46	0.17
AT1G18360	0.01	0.07	3.34	1.57	17.86	4.28	0.24
AT1G08280	0	0	3.34	1.56	8.96	1.32	0.15
AT5G15740	0	0	3.34	1.53	25.66	11.15	0.43
AT3G24150	0	0	3.34	1.53	9.82	1.66	0.17
AT5G28150	0	0	3.34	1.52	14.82	2.62	0.18
AT1G15060	0.03	0.15	3.34	1.51	44.98	5.43	0.12
AT5G53760	0	0	3.34	1.51	6.88	1.66	0.24
AT2G46920	0	0	3.34	1.49	24.65	3.72	0.15
AT1G10850	0	0	3.34	1.49	8.38	2.25	0.27
AT1G78020	0.05	0.25	3.34	1.48	510.84	154.74	0.3
AT2G17220	0	0	3.34	1.28	44.13	5.4	0.12
AT2G41140	0	0	3.34	1.28	70.08	14.51	0.21
AT4G39840	0	0	3.34	1.28	35.32	11.32	0.32
AT3G05270	0.04	0.2	3.34	1.27	25.55	2.83	0.11
AT3G56260	0	0	3.34	1.27	6.86	3.78	0.55
AT3G24770	0	0.03	3.34	1.26	12.83	1.96	0.15
AT1G45616	0	0.03	3.34	1.23	1.13	0.49	0.43
AT2G36580	0	0.02	3.34	1.23	71.19	12.28	0.17
AT2G41090	0	0.04	3.34	1.22	1044.25	224.06	0.21
AT4G21740	0	0.01	3.34	1.22	8.86	2.42	0.27
AT2G01830	0.01	0.09	3.34	1.21	1.72	0.39	0.23
AT4G11350	0	0	3.34	1.17	4.09	1.12	0.27
AT2G04880	0	0	3.34	1.13	41.41	3.83	0.09
AT5G20280	0	0	3.34	2.94	261.61	27.29	0.1
AT5G14970	0.05	0.25	3.34	2.71	173.58	16.14	0.09
AT3G16200	0	0.03	3.34	2.67	17.14	1.35	0.08
AT5G57390	0.05	0.24	3.34	6.65	2.95	0.36	0.12
AT5G54140	0	0.04	3.34	6.47	7.74	0.7	0.09
AT4G04570	0	0	3.34	1.15	71.12	17.73	0.25
AT1G43910	0	0.02	3.34	1.13	12	3.85	0.32
AT4G30100	0.02	0.1	3.34	1	88.36	8.73	0.1
AT4G37100	0	0.02	3.34	0.95	11.34	1.91	0.17
AT5G61010	0	0.01	3.34	0.82	60.62	11.83	0.2
AT5G16190	0	0.04	3.34	0.75	1.81	0.41	0.22
AT5G01540	0.03	0.16	3.34	0.74	13.97	3.53	0.25
AT3G24440	0.01	0.09	3.34	0.12	9.8	0.84	0.09
AT4G29130	0	0	3.34	2.11	76.82	8.57	0.11
AT4G09510	0	0.01	3.34	2.05	17.21	2.14	0.12
AT1G73600	0	0	3.34	1.98	239.4	105.25	0.44
AT1G03310	0	0	3.34	1.9	92.71	22.91	0.25
AT4G02010	0	0	3.34	1.82	31.75	3.58	0.11
AT3G46540	0	0.01	3.34	1.82	36.38	6.44	0.18
AT1G45010	0	0.01	3.34	1.8	10.23	4.64	0.45
AT2G37860	0.01	0.09	3.34	1.48	20.64	1.51	0.07
AT4G15545	0	0.03	3.34	4.84	348.33	42.55	0.12
AT3G28660	0.05	0.23	3.34	2.21	1.46	0.11	0.07
AT4G20980	0	0.02	3.34	2.91	70.8	2.85	0.04
AT5G67500	0.05	0.23	3.34	2.64	111.05	5.87	0.05
AT1G47870	0.02	0.12	3.34	2.45	7.96	0.3	0.04
AT5G52882	0.03	0.16	3.34	2.45	15.93	2.18	0.14
AT3G16270	0	0	3.34	2.45	48.06	1.64	0.03
AT4G11220	0.01	0.05	3.34	2.45	46.81	3.19	0.07
AT3G52990	0	0	3.34	2.02	160.81	23.61	0.15
AT5G05760	0.02	0.1	3.34	1.99	10.85	0.66	0.06
AT1G06210	0.05	0.25	3.34	1.97	27.19	1	0.04
AT1G53310	0	0	3.34	1.96	206.6	27.81	0.13
AT5G18900	0	0	3.34	1.87	38.18	3.8	0.1
AT3G10330	0.04	0.21	3.34	1.87	17.72	1.27	0.07
AT3G46830	0	0.01	3.34	1.87	39.98	4.48	0.11
AT3G27320	0.03	0.18	3.34	1.86	20.76	1.24	0.06
AT5G42570	0	0	3.34	1.85	25.25	2.68	0.11
AT4G16650	0	0	3.34	1.83	25.39	2.69	0.11
AT2G43360	0	0	3.34	1.81	23.67	2.49	0.11
AT2G35610	0.02	0.12	3.34	1.73	36.78	2.93	0.08
AT4G36890	0	0	3.34	1.68	29.27	2.7	0.09
AT4G39990	0	0	3.34	1.67	22.91	2.87	0.13
AT3G42950	0	0.01	3.34	1.66	13.53	1.12	0.08
AT1G74800	0	0	3.34	1.63	11.28	1.56	0.14
AT4G26940	0	0.03	3.34	1.63	38.58	4.11	0.11
AT3G54950	0.03	0.17	3.34	1.62	7.93	0.82	0.1
AT3G09690	0	0.01	3.34	1.59	23.62	1.48	0.06
AT4G30190	0.01	0.05	3.34	1.55	400.38	71.14	0.18
AT4G39170	0	0	3.34	1.24	38.05	2.93	0.08
AT2G18910	0	0	3.32	1.64	19.69	2.17	0.11
AT5G52320	0	0	3.32	1.62	38.54	19.26	0.5
AT5G09620	0	0	3.32	1.61	73.44	7.37	0.1
AT5G11790	0	0	3.32	1.6	54.77	19.86	0.36
AT1G30530	0	0	3.32	1.57	93.27	26.11	0.28
AT1G15950	0.01	0.04	3.32	1.57	127.33	22.67	0.18
AT5G49330	0	0	3.32	1.56	2.69	2.12	0.79
AT1G02880	0	0.03	3.32	1.41	10.46	1.85	0.18
AT5G63770	0	0.01	3.32	1.38	17.58	1.76	0.1
AT3G21560	0.01	0.04	3.32	1.32	23.39	7.67	0.33
AT2G12462	0.02	0.11	3.32	1.31	2.33	0.88	0.38
AT3G59140	0	0	3.32	1.3	24.77	3.96	0.16
AT1G45688	0	0.02	3.32	1.24	66.37	13.75	0.21
AT3G03090	0	0.02	3.32	3.02	15.19	1.04	0.07
AT1G07900	0.01	0.07	3.32	1.28	4.8	1.28	0.27
AT5G49480	0	0	3.32	1.26	36.6	14.65	0.4
AT4G34040	0	0.03	3.32	1.17	37.72	2.28	0.06
AT1G79410	0	0.02	3.32	1.17	6.94	1.71	0.25
AT2G35940	0	0	3.32	1.16	132.14	22.34	0.17
AT1G29300	0	0.02	3.32	1.07	6.27	1.14	0.18
AT4G21990	0	0	3.32	1.02	98.33	29.85	0.3
AT1G25390	0	0.03	3.32	1	33.16	4.35	0.13
AT1G62180	0	0	3.32	0.99	255.43	75.55	0.3
AT5G65920	0	0.02	3.32	0.71	6.94	1.33	0.19
AT5G50420	0	0	3.32	2.19	15.03	2.39	0.16
AT3G54830	0	0	3.32	1.97	32.63	11.78	0.36
AT5G07180	0	0.02	3.32	1.93	7.56	1.54	0.2
AT2G18510	0	0	3.32	1.93	24.27	3.15	0.13
AT2G01970	0	0.01	3.32	1.92	88.61	7.06	0.08
AT2G38710	0.01	0.05	3.32	1.87	23.79	2.18	0.09
AT3G63450	0	0.03	3.32	1.86	4.95	1.28	0.26
AT1G15410	0	0	3.32	1.86	53.87	15.09	0.28
AT5G18830	0.04	0.23	3.32	1.48	32.12	3.59	0.11
AT4G03540	0.01	0.06	3.32	1.48	2.13	0.45	0.21
AT5G18290	0.01	0.04	3.32	0.16	4.59	0.79	0.17
AT5G04870	0	0	3.32	1.47	36.08	2.46	0.07
AT2G42010	0.02	0.11	3.32	2.55	34.88	0.73	0.02
AT3G61240	0.01	0.09	3.32	2.31	50.76	1.35	0.03
AT5G57990	0	0	3.32	2.25	89.39	4.98	0.06
AT2G14860	0	0.04	3.32	2.24	2.14	0.35	0.16
AT2G28520	0	0	3.32	2.08	34.61	3.54	0.1
AT1G74380	0	0	3.32	1.96	43.27	6.38	0.15
AT5G02620	0	0.01	3.32	1.93	36.47	4.32	0.12
AT2G30060	0	0.04	3.32	1.77	45.59	4.77	0.1
AT1G05910	0.04	0.2	3.32	1.68	24.97	1.23	0.05
AT2G39720	0	0.01	3.32	1.68	51.03	3.5	0.07
AT4G01220	0	0	3.32	1.67	10.86	1.7	0.16
AT4G38710	0	0	3.32	1.63	43.51	4.64	0.11
AT1G02970	0.02	0.13	3.32	1.43	1.07	0.18	0.17
AT2G41960	0.02	0.12	3.32	1.24	50.41	2.25	0.04
AT1G06570	0	0	3.32	5.91	89.17	18.45	0.21
AT4G21700	0.01	0.08	3.29	1.71	7.24	0.71	0.1
AT5G43140	0	0.04	3.29	1.69	8.21	1.06	0.13
AT3G09440	0	0	3.29	1.68	268.56	93.57	0.35
AT2G33540	0.01	0.06	3.29	1.42	35.85	3.64	0.1
AT2G25220	0	0	3.29	1.41	1.28	0.39	0.3
AT2G19520	0	0	3.29	2.39	43.64	3.05	0.07
AT4G32620	0.02	0.11	3.29	1.35	37.54	2.1	0.06
AT1G55915	0	0	3.29	1.34	3.75	0.51	0.14
AT5G57015	0.01	0.08	3.29	1.24	18.95	1.51	0.08
AT3G21070	0	0.01	3.29	1.24	20.44	1.48	0.07
AT5G44060	0	0	3.29	1.03	16.59	3.03	0.18
AT4G00630	0	0	3.29	2.23	82.99	17.04	0.21
AT4G39120	0	0.01	3.29	1.97	12.24	1.05	0.09
AT3G44430	0.01	0.06	3.29	1.97	25.12	2.92	0.12
AT1G62640	0	0.02	3.29	1.92	20	1.98	0.1
AT3G27230	0	0.01	3.29	1.92	29.96	3.52	0.12
AT1G66080	0	0	3.29	1.76	5.04	1.1	0.22
AT1G32440	0	0.02	3.29	1.47	32.33	3.39	0.1
AT4G36150	0.01	0.04	3.29	6.21	17.84	2.59	0.15
AT4G30530	0	0.01	3.29	1.48	253.06	24.75	0.1
AT1G62740	0	0.03	3.29	1.95	59.52	5.33	0.09
AT5G56030	0	0	3.29	1.75	221.11	43.5	0.2
AT5G56010	0	0	3.29	1.74	235.62	58.3	0.25
AT1G34550	0	0	3.29	1.47	26.43	2.37	0.09
AT1G43605	0.01	0.05	3.27	1.47	4.75	1.49	0.31
AT2G32400	0.01	0.09	3.27	1.45	16.4	2.17	0.13
AT4G31600	0.01	0.06	3.27	1.39	8.35	0.84	0.1
AT3G03305	0.02	0.12	3.27	3.06	15.82	0.7	0.04
AT5G52450	0	0	3.27	1.54	53.4	5.86	0.11
AT1G04010	0	0.03	3.27	2.08	9.56	1.3	0.14
AT5G14790	0	0	3.27	2.01	12.76	2.5	0.2
AT1G04130	0	0.02	3.27	1.47	7.84	0.76	0.1
AT3G59290	0	0	3.27	2.75	30.83	0.55	0.02
AT1G70770	0	0.02	3.27	2.75	104.74	6.9	0.07
AT3G13100	0.03	0.17	3.27	1.78	7.07	1.31	0.19
AT2G25490	0.03	0.17	3.26	6.17	157.48	8.95	0.06
AT4G04610	0	0.01	3.25	0.28	129.05	28.78	0.22
AT5G14640	0	0.01	3.25	1.47	49.91	13.62	0.27
AT2G20560	0.01	0.09	3.25	2.15	11.89	2.01	0.17
AT4G35260	0.05	0.25	3.25	2.07	85.85	6.56	0.08
AT5G33320	0.02	0.1	3.25	1.85	124.66	7.76	0.06
AT5G65270	0	0.01	3.25	1.82	20.24	2.61	0.13
AT4G36640	0	0.02	3.23	1.39	24.21	4.92	0.2
AT4G34135	0.03	0.19	3.23	1.01	20.25	3.28	0.16
AT3G63500	0.01	0.1	3.22	6.3	106.71	6.56	0.06
AT1G79920	0	0	3.21	3.01	128.96	13.06	0.1
AT4G24160	0.01	0.07	3.2	1.7	16.29	0.63	0.04
AT3G46845	0.03	0.18	3.18	1.66	19.74	2.83	0.14
AT5G42140	0.01	0.06	3.18	0.43	17.54	1.2	0.07
AT4G14680	0	0.01	3.18	0.48	35.56	5.29	0.15
AT5G18340	0.04	0.2	3.16	2.35	3.01	0.4	0.13
AT4G10040	0.04	0.22	3.16	1.76	22.39	1.94	0.09
AT5G43260	0.01	0.06	3.16	0.06	19	1.88	0.1
AT5G58230	0.04	0.22	3.16	2.63	31.41	0.98	0.03
AT3G43960	0.01	0.05	3.16	2.02	5.47	1.15	0.21
AT2G39435	0	0.01	3.16	1.72	13.57	3.2	0.24
AT5G49280	0	0.01	3.14	1.76	16.78	1.62	0.1
AT3G57530	0.03	0.16	3.14	2.66	48.69	3.93	0.08
AT5G23580	0.03	0.16	3.13	1.73	17.03	2.22	0.13
AT1G21880	0	0.01	3.13	1.7	17.19	2.33	0.14
AT2G38090	0	0.01	3.13	1.68	3.27	1	0.31
AT3G15020	0	0	3.13	2.99	23.43	3.13	0.13
AT2G30080	0.04	0.23	3.13	1.01	5.77	0.81	0.14
AT5G35840	0.04	0.23	3.13	0.14	39.53	1.38	0.03
AT3G61960	0	0	3.13	1.79	40.35	4.35	0.11
AT1G24120	0	0	3.11	1.79	14.02	2	0.14
AT2G03350	0.01	0.09	3.11	1.71	19.96	1.89	0.09
AT1G31780	0	0	3.11	3.06	39.09	3.23	0.08
AT5G11650	0	0.04	3.11	1.41	23.13	2.43	0.11
AT3G17630	0.01	0.07	3.11	1.41	4.37	0.46	0.11
AT1G13195	0.01	0.08	3.11	1.08	12.39	1.45	0.12
AT4G01500	0.01	0.08	3.11	0.62	1.08	0.25	0.23
AT5G39360	0.05	0.25	3.11	0.49	13.62	1.07	0.08
AT5G08660	0	0.01	3.11	0.41	29.73	3.28	0.11
AT3G58630	0	0	3.11	1.74	11.89	1.46	0.12
AT5G59350	0	0.01	3.11	2.15	13.01	2.86	0.22
AT4G33180	0.02	0.11	3.11	1.81	7.85	1.12	0.14
AT5G14700	0.01	0.05	3.1	1.93	7.22	0.98	0.14
AT3G10720	0.04	0.23	3.09	6.08	32.47	5.28	0.16
AT3G21790	0.03	0.16	3.09	6.02	35.57	2.67	0.08
AT4G28320	0.04	0.2	3.09	1.88	2.56	0.37	0.15
AT3G59050	0	0	3.09	1.77	32.85	5.24	0.16
AT5G67470	0.01	0.04	3.09	1.75	31.04	3.26	0.11
AT5G65470	0	0.01	3.09	1.74	32.32	5.69	0.18
AT3G04140	0.04	0.22	3.09	1.73	21.43	4.4	0.21
AT2G29120	0	0	3.09	1.7	35.57	7.57	0.21
AT2G33490	0.02	0.14	3.09	1.52	26.58	1.48	0.06
AT4G12650	0	0	3.09	3.22	119.77	8.9	0.07
AT1G63940	0.03	0.15	3.09	2.96	51.02	7.01	0.14
AT1G53070	0	0.03	3.09	2.81	23.45	5.97	0.25
AT3G58790	0	0	3.09	2.64	18.5	2.57	0.14
AT2G32410	0.04	0.23	3.09	1.33	6.72	0.44	0.07
AT5G49100	0.04	0.21	3.09	1.05	7.4	2.27	0.31
AT1G32870	0.03	0.19	3.09	1	12.95	1.42	0.11
AT1G43850	0.02	0.1	3.09	0.18	70.95	3.32	0.05
AT5G03140	0	0	3.09	2.09	35.44	6.97	0.2
AT3G18620	0	0.01	3.09	1.78	7.06	0.8	0.11
AT2G47330	0.01	0.09	3.09	2.89	34.49	0.84	0.02
AT1G05520	0	0	3.09	2.21	54.81	4.83	0.09
AT1G09780	0	0	3.09	2.16	89.09	15.3	0.17
AT1G28680	0	0	3.07	2.09	44.12	7.6	0.17
AT1G07350	0	0	3.07	1.86	53.36	11.47	0.21
AT4G28480	0	0	3.07	1.86	33.56	4.08	0.12
AT4G14240	0	0	3.07	1.85	27.51	4.76	0.17
AT5G55260	0	0	3.07	1.85	10.63	1.7	0.16
AT3G47640	0	0	3.07	1.85	15.2	5.29	0.35
AT5G52410	0	0	3.07	1.84	11.92	2.1	0.18
AT3G15350	0	0	3.07	1.82	19.36	3.47	0.18
AT4G02590	0.04	0.22	3.07	1.82	40.68	2.34	0.06
AT5G41070	0	0	3.07	1.81	4.75	1.45	0.31
AT4G23490	0	0	3.07	1.8	6.11	2.21	0.36
AT2G26770	0	0	3.07	1.79	26.79	2.46	0.09
AT1G09020	0	0.02	3.07	1.75	43.07	2.5	0.06
AT5G44390	0	0.02	3.07	1.7	9.72	1.8	0.18
AT1G76620	0	0.02	3.07	1.51	3.77	1.6	0.42
AT5G63050	0.05	0.24	3.07	1.51	18.36	1.13	0.06
AT2G01680	0	0.02	3.07	1.51	62.21	6.03	0.1
AT4G00430	0.02	0.13	3.07	1.51	158.74	30.29	0.19
AT4G20890	0	0	3.07	3.23	120.83	13.15	0.11
AT2G30980	0.02	0.1	3.07	2.86	94.83	4.55	0.05
AT3G51180	0	0	3.07	1.57	4.77	0.97	0.2
AT2G18860	0	0.03	3.07	1.24	23.89	3.88	0.16
AT5G38210	0.01	0.09	3.07	1.22	27.5	1.89	0.07
AT2G46440	0.04	0.23	3.07	0.81	148.6	19.62	0.13
AT1G05630	0.01	0.04	3.07	0.58	15.44	2.05	0.13
AT1G67930	0	0.01	3.07	2.22	28.89	3.03	0.1
AT5G53470	0.01	0.09	3.07	1.37	15.45	0.93	0.06
AT5G40270	0.01	0.04	3.07	1.87	9.15	0.76	0.08
AT1G61400	0	0	3.07	2.1	1.05	0.23	0.22
AT1G69290	0.01	0.08	3.07	1.87	2.88	0.24	0.08
AT3G10770	0.04	0.22	3.07	6.01	107.02	6.27	0.06
AT4G17615	0.03	0.18	3.05	0.88	11.5	1.24	0.11
AT1G63010	0.02	0.12	3.05	5.7	67.93	0.09	0
AT2G39830	0	0.04	3.04	2.13	9.89	1.2	0.12
AT5G27030	0	0.01	3.04	1.92	36.87	5.74	0.16
AT5G20885	0	0	3.04	1.9	12.23	2.08	0.17
AT4G00570	0	0	3.04	1.9	86.11	11.93	0.14
AT5G60570	0	0.01	3.04	1.89	33.42	2.67	0.08
AT3G26700	0.02	0.14	3.04	1.88	10.1	1.85	0.18
AT1G72470	0	0	3.04	1.88	8.26	1.98	0.24
AT2G25260	0	0	3.04	1.88	2.33	0.55	0.24
AT5G02590	0	0	3.04	1.87	18.22	7.46	0.41
AT3G16050	0	0	3.04	1.86	13.45	2.79	0.21
AT1G73700	0.04	0.2	3.04	1.85	1.79	0.32	0.18
AT2G38650	0	0	3.04	1.84	32.81	3.85	0.12
AT4G23440	0	0	3.04	1.83	6.31	0.73	0.11
AT5G12080	0	0	3.04	1.82	18.97	2.72	0.14
AT5G22930	0.05	0.24	3.04	1.79	1.87	0.49	0.26
AT3G48700	0.02	0.1	3.04	1.77	1.16	0.54	0.47
AT2G28350	0	0.01	3.04	1.51	22.62	2.53	0.11
AT1G07510	0.01	0.05	3.04	1.51	34.63	1.54	0.04
AT5G56890	0.03	0.15	3.04	1.51	36.57	4.68	0.13
AT3G62810	0.03	0.15	3.04	3.71	15.56	0.68	0.04
AT3G55200	0.03	0.15	3.04	3.48	7.24	0.48	0.07
AT1G35160	0	0.02	3.04	3.44	77.36	4.68	0.06
AT3G10370	0.01	0.06	3.04	3.44	48.86	2.36	0.05
AT1G62020	0	0.02	3.04	3.28	74.16	5.85	0.08
AT3G29360	0	0.01	3.04	3.27	112.31	12.26	0.11
AT1G14830	0	0.04	3.04	2.72	63.6	5.28	0.08
AT4G18890	0	0	3.04	1.66	5.86	1.03	0.18
AT5G55040	0.04	0.23	3.04	1.39	40.24	4.08	0.1
AT3G58980	0.01	0.08	3.04	1.19	3.38	0.46	0.14
AT2G20370	0	0	3.04	2.14	31.17	4.3	0.14
AT2G28900	0	0.01	3.04	3.32	164.43	48.73	0.3
AT5G49520	0.02	0.14	3.04	0.91	8.29	1.6	0.19
AT2G41830	0	0.04	3.04	3.06	8.4	0.37	0.04
AT3G05030	0	0.01	3.04	2.55	35.62	8.98	0.25
AT4G24490	0.01	0.04	3.04	2.46	23.17	1.35	0.06
AT3G04120	0	0	3.04	2.41	524.95	48.28	0.09
AT5G51300	0.01	0.09	3.04	2.27	59.43	3.99	0.07
AT5G39500	0.01	0.09	3.04	2.23	33.04	2.18	0.07
AT2G18730	0	0	3.04	2.15	56.14	8.29	0.15
AT1G64810	0.04	0.23	3.04	2.02	43.91	3.05	0.07
AT3G27090	0	0	3.04	5.91	182.38	9.08	0.05
AT5G10520	0.03	0.16	3.03	0.02	7.86	2.55	0.32
AT3G11320	0	0.02	3.02	1.9	17.66	1.4	0.08
AT3G10760	0.01	0.05	3.02	1.89	36.48	4.92	0.13
AT5G10290	0	0.01	3.02	1.88	36.09	4.83	0.13
AT2G37300	0.02	0.13	3.02	1.84	2.19	0.58	0.27
AT5G58760	0.01	0.08	3.02	1.83	5.66	0.78	0.14
AT1G80280	0.01	0.08	3.02	1.5	4.64	1.16	0.25
AT1G59640	0.04	0.2	3.02	1.5	4.78	0.76	0.16
AT4G33140	0.03	0.16	3.02	1.5	7.77	0.92	0.12
AT2G27360	0.02	0.12	3.02	1.5	9.77	1.44	0.15
AT5G15470	0.03	0.17	3.02	1.5	13.43	1.42	0.11
AT2G43410	0	0	3.02	1.5	43.35	3.68	0.08
AT5G41950	0	0	3.02	3.51	45.43	2.12	0.05
AT1G62330	0	0	3.02	2.84	31.79	3.81	0.12
AT1G79550	0	0.01	3.02	2.7	227.92	21.75	0.1
AT3G22470	0	0.01	3.02	1.3	3.02	0.4	0.13
AT3G59750	0	0.01	3.02	1.23	1.79	0.4	0.23
AT4G10550	0.01	0.05	3.02	1.03	6.67	0.55	0.08
AT4G00955	0	0.02	3.02	0.61	14.16	1.84	0.13
AT5G07350	0.03	0.18	3.02	2.78	98.43	8.97	0.09
AT4G13930	0	0.02	3.02	2.14	111.4	17.73	0.16
AT1G80910	0.01	0.06	3.02	2.01	22.02	1.44	0.07
AT4G16370	0.01	0.08	3.02	1.9	184.33	53.03	0.29
AT2G01660	0.02	0.13	3.02	1.87	9.54	1.97	0.21
AT3G21110	0.02	0.14	3.02	1.76	9.75	0.73	0.08
AT4G37450	0.04	0.21	3.02	1.5	13.36	2.24	0.17
AT2G44670	0	0.01	3.02	1.5	284	48.4	0.17
AT3G19990	0.03	0.18	3.02	3.15	35.34	1.28	0.04
AT4G19006	0.02	0.13	3.02	3.07	28.48	1.11	0.04
AT2G36480	0.02	0.11	3.02	3.05	23.76	0.25	0.01
AT5G59180	0.05	0.24	3.02	2.56	9.36	0.86	0.09
AT3G53880	0	0	3.02	2.53	7.43	1.17	0.16
AT1G02090	0	0.01	3.02	2.48	24.46	1.77	0.07
AT5G55610	0	0	3.02	2.43	29.71	3.01	0.1
AT4G15920	0	0.03	3.02	2.38	18.1	4.55	0.25
AT1G47340	0.02	0.13	3.02	2.23	8.97	0.92	0.1
AT2G36880	0	0.01	3.02	2.2	294.32	48.39	0.16
AT1G30160	0	0.04	3.02	2.17	2.76	0.35	0.13
AT2G20000	0.01	0.08	3.02	1.98	18.3	1.49	0.08
AT4G24630	0	0	3.02	5.79	24.24	2.41	0.1
AT3G55690	0.01	0.06	3	2.12	1.7	0.3	0.18
AT5G65090	0.04	0.21	3	1.98	1.57	0.36	0.23
AT3G13320	0	0.02	3	1.98	30.13	1.93	0.06
AT3G29030	0.04	0.23	3	1.94	4.47	1.98	0.44
AT3G57630	0.01	0.05	3	1.93	35.24	5.12	0.15
AT2G40800	0.02	0.11	3	1.93	20.02	0.96	0.05
AT1G03040	0	0	3	1.92	40.39	2.09	0.05
AT3G59220	0	0.03	3	1.92	6.51	1.33	0.2
AT4G32920	0	0.01	3	1.87	33.4	7.54	0.23
AT5G54710	0.03	0.19	3	1.86	37.21	6.55	0.18
AT3G16560	0.02	0.11	3	1.5	7.77	1.14	0.15
AT3G19370	0.02	0.14	3	1.5	22.04	2.91	0.13
AT1G21660	0.04	0.23	3	1.5	40	2.99	0.07
AT4G00440	0.01	0.08	3	1.5	50.2	5.74	0.11
AT3G05420	0	0.01	3	3.52	46.25	3.66	0.08
AT5G55070	0.02	0.13	3	3.5	111.14	4.91	0.04
AT3G03960	0.03	0.16	3	3.48	59.55	2.81	0.05
AT1G09270	0.03	0.16	3	3.37	51.49	1.83	0.04
AT1G51805	0.01	0.05	3	1.62	135.73	17.13	0.13
AT2G26170	0.04	0.23	3	1.47	38.35	6.99	0.18
AT1G63880	0.02	0.13	3	1.46	103.5	4.65	0.04
AT4G27680	0.03	0.17	3	1.37	20.41	1.08	0.05
AT5G56740	0.02	0.12	3	1.25	15.33	1.01	0.07
AT2G27110	0.02	0.11	3	1.25	23.68	1.33	0.06
AT1G36370	0	0	3	1.22	33.78	5.35	0.16
AT3G20490	0	0	3	0.74	3.57	0.47	0.13
AT1G71110	0.02	0.12	3	0.66	9.94	0.87	0.09
AT2G17525	0.02	0.12	3	0.55	3.82	0.42	0.11
AT3G63445	0	0.03	3	0.51	10.25	1.13	0.11
AT1G74430	0.01	0.06	3	2.52	11.32	1.61	0.14
AT5G43400	0	0	3	2.49	2.85	0.63	0.22
AT5G40540	0	0.02	3	2.49	3.2	0.72	0.22
AT1G25570	0.02	0.11	3	2.18	36.71	2.93	0.08
AT1G77260	0	0.01	3	2.03	35.58	3.79	0.11
AT4G33565	0	0.02	3	0.25	44.76	5.42	0.12
AT5G49550	0.05	0.25	3	3.23	7.1	0.38	0.05
AT3G56740	0.01	0.09	3	2.07	10.99	0.92	0.08
AT1G67410	0	0.03	3	2.03	10.06	0.87	0.09
AT5G36002	0.01	0.06	3	5.97	1.6	0.34	0.21
AT1G15910	0.02	0.1	3	5.69	19.79	1.75	0.09
AT3G03490	0.05	0.25	3	5.56	18.81	1.36	0.07
AT5G66760	0	0.01	2.99	0.52	126.26	0.71	0.01
AT1G10210	0.01	0.04	2.98	5.76	16.26	1.25	0.08
AT3G57980	0	0	2.98	2.23	7.32	1.12	0.15
AT3G24500	0	0.01	2.98	2.06	28.08	5.78	0.21
AT5G09670	0.03	0.17	2.98	1.97	62.95	2.88	0.05
AT1G66390	0	0	2.98	1.96	5.91	2.53	0.43
AT3G60160	0.01	0.08	2.98	1.5	8.37	1.57	0.19
AT1G69770	0.02	0.11	2.98	0.86	8.81	0.48	0.05
AT3G27080	0.02	0.1	2.98	3.86	20.11	1.09	0.05
AT1G20770	0.03	0.17	2.98	3.81	20.52	0.63	0.03
AT4G24820	0.02	0.1	2.98	3.57	98.01	2.48	0.03
AT3G25580	0.02	0.14	2.98	3.04	8.58	0.56	0.06
AT1G66530	0	0	2.98	2.89	21.99	1.39	0.06
AT3G45290	0	0.03	2.98	1.78	9.72	1.4	0.14
AT1G58602	0.03	0.16	2.98	1.71	349.32	42.75	0.12
AT4G26950	0	0.02	2.98	1.59	5.49	1.71	0.31
AT3G59630	0.02	0.14	2.98	1.5	12.11	0.7	0.06
AT4G36140	0.01	0.07	2.98	1.46	26.21	2.12	0.08
AT4G18130	0.05	0.24	2.98	1.25	36.09	3.11	0.09
AT1G25280	0.02	0.14	2.98	0.59	48.64	1.8	0.04
AT1G74170	0	0.02	2.98	0.52	14.23	1.61	0.11
AT3G57710	0.02	0.12	2.98	0.43	9.03	0.74	0.08
AT5G46410	0.03	0.16	2.98	0.41	45.55	4.11	0.09
AT2G16950	0.02	0.13	2.98	3.08	86.74	3.01	0.03
AT4G24670	0.03	0.16	2.98	2.33	2.6	0.44	0.17
AT3G49680	0.04	0.2	2.98	2.3	73.64	5.65	0.08
AT3G12050	0	0	2.98	2.3	43.83	4.45	0.1
AT4G31350	0	0.01	2.98	1.75	16.7	2.04	0.12
AT5G61780	0	0.03	2.98	3.62	73.51	2.52	0.03
AT5G10820	0.01	0.07	2.98	3.32	5.41	0.23	0.04
AT5G45420	0.04	0.2	2.98	2.76	23.52	1.47	0.06
AT3G26780	0.02	0.14	2.98	2.33	37.7	2.36	0.06
AT4G05400	0.01	0.07	2.98	2.28	9.93	1.1	0.11
AT4G19450	0.01	0.05	2.97	2.05	68.55	5.41	0.08
AT2G31370	0	0.04	2.97	1.8	36.81	2.61	0.07
AT5G67140	0.01	0.05	2.97	1.72	13.25	2.14	0.16
AT2G46450	0.01	0.06	2.97	1.61	86.83	12.37	0.14
AT4G12700	0.01	0.04	2.97	1.49	4.92	0.55	0.11
AT2G01260	0.01	0.05	2.97	1.49	21.49	1.88	0.09
AT1G77740	0	0	2.97	1.49	31.63	2.85	0.09
AT3G04080	0.03	0.18	2.97	3.61	29.01	1.06	0.04
AT1G30630	0.04	0.22	2.97	3.59	59.14	1.63	0.03
AT5G09590	0.03	0.15	2.97	3.57	92.59	5.4	0.06
AT5G11040	0	0.02	2.97	3.22	45.04	2.4	0.05
AT2G17190	0.02	0.13	2.97	3.21	70.24	2.53	0.04
AT3G01640	0.05	0.25	2.97	2.09	12.8	0.82	0.06
AT2G46340	0	0.04	2.97	0.69	99.53	8.19	0.08
AT3G28180	0.03	0.18	2.97	3.33	60.19	4.8	0.08
AT3G07090	0	0	2.97	2.31	26.74	4.61	0.17
AT3G18165	0	0	2.97	1.74	25.53	0.98	0.04
AT5G16300	0.03	0.18	2.97	3.47	44.02	1.07	0.02
AT5G58700	0	0	2.97	1.99	2.86	0.38	0.13
AT1G07410	0.03	0.18	2.97	1.74	1.49	0.17	0.11
AT4G00290	0.02	0.11	2.97	5.66	17.35	1.6	0.09
AT2G45150	0	0	2.95	2.08	9.26	0.93	0.1
AT5G39990	0	0	2.95	2.08	14.37	1.32	0.09
AT5G64020	0.02	0.14	2.95	2.04	18.87	1.29	0.07
AT4G16140	0.04	0.21	2.95	1.25	4.53	0.99	0.22
AT3G49390	0.02	0.13	2.95	3.77	32.33	0.48	0.01
AT4G18040	0.04	0.23	2.95	3.73	31.47	0.68	0.02
AT4G24660	0.01	0.05	2.95	3.56	7.71	1.15	0.15
AT3G44110	0.01	0.09	2.95	3.47	275.02	10.67	0.04
AT3G58560	0.02	0.13	2.95	3	56.88	2.46	0.04
AT2G36630	0.03	0.16	2.95	1.25	22.72	3.36	0.15
AT1G60430	0.04	0.22	2.95	1	13.47	0.64	0.05
AT5G41740	0.02	0.12	2.95	0.38	28.57	3.13	0.11
AT5G58800	0.05	0.25	2.95	0.75	34.15	2.84	0.08
AT2G19880	0	0.01	2.95	2.17	24.14	2.6	0.11
AT1G10920	0.02	0.11	2.95	0.51	13.98	1.06	0.08
AT1G76340	0	0.01	2.93	2.14	10.52	0.74	0.07
AT1G73930	0	0.01	2.93	2.07	17.16	1.33	0.08
AT4G13050	0.01	0.05	2.93	1.49	18.09	1.45	0.08
AT1G01520	0.03	0.16	2.93	1.24	5.96	2.33	0.39
AT3G04710	0.03	0.15	2.93	3.81	12.69	0.53	0.04
AT1G31485	0.03	0.16	2.93	1.8	1.1	0.21	0.19
AT2G25680	0.04	0.19	2.93	0.76	3.36	0.69	0.2
AT1G78200	0	0.02	2.93	0.42	23.94	1.6	0.07
AT5G46450	0.01	0.07	2.93	0.26	44.5	3.48	0.08
AT3G55610	0.02	0.11	2.93	0.2	140.95	23.05	0.16
AT3G12580	0	0.03	2.93	2.55	57.36	19.85	0.35
AT1G61430	0.02	0.12	2.93	0.76	9.05	1.09	0.12
AT5G11950	0.01	0.09	2.91	2.19	29.43	3	0.1
AT4G37630	0.02	0.11	2.91	3.72	4.51	0.04	0.01
AT1G55620	0.02	0.12	2.91	2.76	17.81	0.9	0.05
AT5G02065	0.01	0.08	2.91	1.88	1.43	0.17	0.12
AT2G05260	0.01	0.07	2.91	1.24	5.33	0.43	0.08
AT2G26280	0	0.03	2.91	1	81.8	5.06	0.06
AT5G02670	0.05	0.24	2.91	1	7.24	0.9	0.12
AT1G73450	0.01	0.06	2.91	0.64	12.05	0.75	0.06
AT2G34660	0.03	0.17	2.91	1.49	77.53	6.3	0.08
AT4G03260	0.01	0.05	2.89	1.24	127.64	9.79	0.08
AT5G43725	0	0.03	4.36	4.77	1.31	0.22	0.17
ATCG00560	0.02	0.11	4.36	3.91	3.2	0.95	0.3
AT2G27090	0	0	4.36	2.84	48.22	3.27	0.07
AT3G20340	0.04	0.22	4.36	3.53	1.16	0.62	0.53
AT5G53540	0.01	0.08	4.36	3.47	29.19	1.51	0.05
AT5G04600	0	0.04	4.33	5.41	33.54	1.44	0.04
ATCG01100	0	0	4.33	3.6	7.15	2.18	0.31
AT5G04430	0.03	0.18	4.33	3.19	66.32	4.06	0.06
AT3G28760	0	0.03	4.33	2.02	5.54	0.4	0.07
AT5G56840	0	0.01	4.33	1.77	1.75	0.31	0.18
AT5G65460	0	0.01	4.33	1.6	17.5	1.34	0.08
AT4G13550	0.03	0.18	4.33	1.48	30.23	1.53	0.05
AT4G34060	0	0.01	4.33	1.17	2.1	0.39	0.18
AT5G27430	0	0	4.33	3.95	17.33	1.54	0.09
AT5G42030	0.01	0.09	4.29	1.39	53.59	5.47	0.1
[truncated: 2,075 more rows]
