# Supplementary material for: An auxin-mediated ultradian rhythm promotes root regeneration in Arabidopsis
Source: Research Square preprint supplement (doi:10.21203/rs.3.rs-604908/v1), 2021-06-25
Supplement: Supplementary file 8 [file d5879babd3242a2593682f84.xlsx]

## Sheet: Supplementary Table 3
Supplementary Table 3. List of de novo root regeneration (DNRR)-associated genes obtained from previous studies.
TAIR	Gene	Auxin-related	Phase I	Phase II	Phase III	UR	No. of Cluster	DEG	References
AT1G77690	LAX3	Auxin transport		✔		UR	1	✔	Marchant et al., 2002; Swarup et al., 2008; Della Rovere et al., 2013; 2015; Bustillo-Avendaño et al., 2018
AT1G04180	YUC9	Auxin synthesis		✔		UR	2	✔	Chen L. et al., 2016; Tang et al., 2017
AT1G14920	GAI				✔	UR	2		Ibáñez et al., 2019
AT1G70940	PIN3	Auxin transport		✔		UR	5		Bustillo-Avendaño et al., 2018; Petrásek and Friml, 2009
AT3G54220	SCR				✔	UR	9		Della Rovere et al., 2015; Sabatini et al., 2003; Sugimoto et al., 2010; Kim et al., 2018
AT5G20730	ARF7	Auxin signal				UR	NE		Okushima et al., 2005; 2007; Liu et al., 2014; Lee et al., 2017
AT1G19220	ARF19	Auxin signal				UR	10		Okushima et al., 2005; 2007; Liu et al., 2014; Lee et al., 2017
AT1G70560	TAA1	Auxin synthesis		✔	✔	UR	NE		Sun et al., 2016; Stepanova et al., 2008
AT4G24670	TAR2	Auxin synthesis		✔	✔	UR	NE		Sun et al., 2016; Stepanova et al., 2008
AT3G27010	TCP20				✔	UR	NE		Shimotohno et al., 2018
AT4G28720	YUC8	Auxin synthesis		✔			2	✔	Chen L. et al., 2016; Tang et al., 2017
AT5G57090	PIN2	Auxin transport		✔			2	✔	Bustillo-Avendaño et al., 2018;Petrásek and Friml, 2009
AT3G03660	WOX11			✔			2	✔	Liu et al., 2014; Sheng et al., 2017
AT4G37650	SHR				✔		3		Helariutta et al., 2000; Lucas et al., 2011; Della Rovere et al., 2015; Bustillo-Avendaño et al., 2018
AT5G17810	WOX12			✔			3	✔	Liu et al., 2014; Sheng et al., 2017
AT5G25620	YUC6	Auxin synthesis		✔			5		Chen L. et al., 2016; Tang et al., 2017
AT5G07310	ERF115		✔		✔		5	✔	Zhou et al., 2019; Ikeuchi et al., 2017; Heyman et al., 2013
AT4G34410	ERF109		✔				6		Zhang et al., 2019; Cai et al., 2014
AT1G23080	PIN7	Auxin transport		✔			9		Bustillo-Avendaño et al., 2018;Petrásek and Friml, 2009
AT4G14550	IAA14	Auxin signal			✔		10	✔	Fukaki et al., 2002; Shang et al., 2016; Bustillo-Avendaño et al., 2018; Fukaki et al., 2002; Vanneste et al., 2005
AT3G28860	ABCB19	Auxin transport		✔			10		Wu et al., 2007; Sukumar et al., 2013
AT5G11030	ALF4	Auxin signal			✔		NE		Bagchi et al., 2018; Celenza et al., 1995; Sugimoto et al., 2010; Liu et al., 2014; Bustillo-Avendaño et al., 2018
AT4G32540	YUC1	Auxin synthesis		✔			NE		Chen L. et al., 2016; Tang et al., 2017
AT4G13260	YUC2	Auxin synthesis		✔			NE		Chen L. et al., 2016; Tang et al., 2017
AT5G11320	YUC4	Auxin synthesis		✔			NE		Chen L. et al., 2016; Tang et al., 2017
AT2G38120	AUX1	Auxin transport		✔			NE		Marchant et al., 2002; Swarup et al., 2008; Della Rovere et al., 2013; 2015; Bustillo-Avendaño et al., 2018
AT1G73590	PIN1	Auxin transport		✔			NE		Bustillo-Avendaño et al., 2018; Petrásek and Friml, 2009
AT2G42430	LBD16				✔		NE		Liu et al., 2014; Okushima et al., 2007; Fan et al., 2012
AT3G58190	LBD29				✔		NE		Liu et al., 2014; Okushima et al., 2007; Fan et al., 2012
AT3G20840	PLT1				✔		NE		Shimotohno et al., 2018; Bustillo-Avendaño et al., 2018; Aida et al., 2004; Hofhuis et al., 2013; Du and Scheres, 2018
AT1G51190	PLT2				✔		NE		Shimotohno et al., 2018; Bustillo-Avendaño et al., 2018; Aida et al., 2004; Hofhuis et al., 2013; Du and Scheres, 2018
AT5G08330	TCP21				✔		NE		Shimotohno et al., 2018
AT3G11260	WOX5				✔		NE		Hu and Xu, 2016; Sarkar et al., 2007; Sugimoto et al., 2010; Kim et al., 2018; Kong et al., 2016
AT5G05770	WOX7				✔		NE		Hu and Xu, 2016; Sarkar et al., 2007; Sugimoto et al., 2010; Kim et al., 2018; Kong et al., 2016
AT1G56010	NAC1				✔		NE		Xie et al., 2000; Chen X. et al., 2016
✔, validated via gene expression or mutant phenotype which assumed involvement in DNRR
NE, The gene not enough expressed to passing cut-off in eur1-11 mutants
